# Supplementary material for: Antimicrobial Resistance Genes, Cassettes, and Plasmids Present in Salmonella enterica Associated With United States Food Animals
Source: Front Microbiol. 2019 Apr 17;10:832. doi: 10.3389/fmicb.2019.00832 (PMC6479191; doi:10.3389/fmicb.2019.00832)
Supplement: Supplementary file 1 [file Table_1.XLSX]

## Sheet: Supplementary Table 1
Supplementary Table 1. Metadata, genotypic, and phenotypic information for each isolate in the retrospective isolate set. Blank cells in the year, source, and source category columns indicate unknown information. Blank cells in all other columns indicate that the isolate does not contain the replicon, gene, or ARC. For phenotypic data, R indicates resistant, blank indicates susceptible or interme…
Strain ID	Serotype	Year	Source	Source Category	AC	F	HI1	HI2	I1	N	Q1	X	pSC101	colE (rep)	colE (rel)	Aminoglycosides: aac6	Aminoglycosides: aac3-Iid	Aminoglycosides: aac3-VIa	Aminoglycosides: aac4	Aminoglycosides: aphA	Aminoglycosides: sph	Aminoglycosides: aph4	Aminoglycosides: aph3	Aminoglycosides: strA	Aminoglycosides: strB	Aminoglycosides: aadA	Aminoglycosides: aadB	Aminoglycosides: ant	Beta-lactamase: CMY	Beta-lactamase: TEM-1	Beta-lactamase: CARB	Tetracycline: tetA	Tetracycline: tetR	Tetracycline: tetB	Tetracycline: tetC	Tetracycline: tetG	Tetracycline: tetM	Sulfonamide: sul1	Sulfonamide: sul2	Sulfonamide: sul3	Phenicol: floR	Phenicol: cmlA	Phenicol: catA	fosfomycin: fosA	MLS: mphA	MLS: ereA	MLS: mefB	Trimethoprim: dfrA	Rifampicin: arr2
CRJJGF_00001	Kentucky	2009	Chill water	poultry environmental		F										aac6-Iy								strA	strB									tetB
CRJJGF_00003	Heidelberg	1998	Cattle	cattle	A/C							X4				aac6-Iy							aph(3")-Ia	strA	strB		aadB		blaCMY-2	blaTEM-1		tetA	tetR					sul1	sul2		floR	cmlA5		fosA				dfrA1
CRJJGF_00004	Enteritidis	2008	Foam	poultry environmental		F										aac6-Iy
CRJJGF_00005	Enteritidis	2001	Chicken	chicken		F										aac6-Iy
CRJJGF_00006	Enteritidis	2008	Scald water	chicken												aac6-Iy
CRJJGF_00007	Enteritidis	2005	Young chicken rinse	chicken		F										aac6-Iy
CRJJGF_00008	Enteritidis	2007	Ground chicken	chicken		F						X1				aac6-Iy
CRJJGF_00009	Enteritidis	2010	Young Chicken carcass rinse	chicken		F										aac6-Iy
CRJJGF_00010	Enteritidis	2002	Ready to eat product	ready to eat		F										aac6-Iy
CRJJGF_00011	Enteritidis	2002	Cattle	cattle		F										aac6-Iy
CRJJGF_00012	Enteritidis	1998	Chicken	chicken		F								colE	colE (mob)	aac6-Iy														blaTEM-1
CRJJGF_00013	Enteritidis	2010	Ground Chicken	chicken		F						X1				aac6-Iy
CRJJGF_00014	Newport				A/C									colE		aac6-Iy		aac3-VIa					aph(3")-Ia	strA	strB	aadA22			blaCMY-2			tetA	tetR					sul1	sul2		floR
CRJJGF_00015	Typhimurium var. O 5 - (Copenhagen)	2004	Young chicken rinse	chicken	A/C				I1						colE (mobA)	aac6-Iaa													blaCMY-2			tetA	tetR					sul1
CRJJGF_00016	Typhimurium var. O 5 - (Copenhagen)	2001	Dairy cattle	cattle		F										aac6-Iaa							aph(3")-Ia			aadA12				blaTEM-1		tetA	tetR					sul1
CRJJGF_00017	Typhimurium	2007	Turkey carcass swab	turkey	A/C	F								colE	colE (mob)	aac6-Iaa							aph(3")-Ia	strA	strB		aadB		blaCMY-2	blaTEM-1		tetA	tetR	tetB					sul2		floR	cmlA5
CRJJGF_00018	Typhimurium	2003	Egg	chicken		F										aac6-Iaa										aadA2					blaCARB-3		tetR			tetG					floR
CRJJGF_00019	Agona	2005	Swine	swine	A/C											aac6-Iy							aph(3")-Ia	strA	strB				blaCMY-2			tetA	tetR					sul1	sul2		floR			fosA				dfrA1
CRJJGF_00020	Agona	2007	Ready to eat product	ready to eat					I1							aac6-Iy																		tetB					sul2					fosA
CRJJGF_00021	Montevideo	2005	Young chicken rinse	chicken					I1							aac6-Iy																												fosA
CRJJGF_00022	Derby	2006	Turkey swab	turkey					I1							aac6-Iy										aadA2						tetA	tetR					sul1						fosA
CRJJGF_00023	Hadar	2004	Environmental-hall	environmental					I1					colE		aac6-Iy								strA	strB	aad1A-pm						tetA	tetR					sul1
CRJJGF_00024	Hadar	2004	Cattle	cattle								X1				aac6-Iy								strA	strB					blaTEM-1		tetA	tetR
CRJJGF_00025	Heidelberg											X1		colE	colE (mob)	aac6-Iy																												fosA
CRJJGF_00026	Anatum	2009	Cattle	cattle												aac6-Iy
CRJJGF_00027	Dublin	2004	Dairy cattle	cattle	A/C							X1				aac6-Iy							aph(3")-Ia	strA	strB		aadB		blaCMY-2	blaTEM-1		tetA	tetR						sul2		floR	cmlA
CRJJGF_00028	Dublin	2003	Young chicken rinse	chicken		F	HI1					X1				aac6-Iy								strA	strB	aad1A-pm				blaTEM-1				tetB				sul1					catA1
CRJJGF_00029	Typhimurium I 4,[5],12:i:-	2004	Ground turkey	turkey		F			I1							aac6-Iaa		aac3-VIa								aad1A-pm												sul1
CRJJGF_00030	Infantis	2005	Young chicken rinse	chicken					I1							aac6-Iy													blaCMY-2
CRJJGF_00031	Infantis	2005	Swine	swine					I1							aac6-Iy
CRJJGF_00032	Senftenberg	2010	Ground beef	cattle										colE x 3	colE x 3	aac6-Iy														blaTEM-1
CRJJGF_00033	Schwarzengrund								I1						colE (mobA)	aac6-Iy		aac3-VIa								aad1A-pm												sul1
CRJJGF_00034	Schwarzengrund													colE x 2		aac6-Iy
CRJJGF_00035	Mbandaka					F										aac6-Iaa										aadA2						tetA	tetR					sul1										dfrA12
CRJJGF_00036	Saintpaul	2004	Horse	horse												aac6-Iy
CRJJGF_00037	Saintpaul	2010	Turkey swab	turkey					I1			X1				aac6-Iy													blaCMY-2	blaTEM-1
CRJJGF_00038	Muenster	2009	Dog	dog												aac6-Iy
CRJJGF_00039	Uganda	2008	Ground beef	cattle	A/C											aac6-Iy								strA	strB		aadB		blaCMY-2			tetA	tetR					sul1	sul2		floR	cmlA5
CRJJGF_00040	Reading	2004	Cattle	cattle	A/C				I1			X1				aac6-Iaa		aac3-VIa						strA	strB	aadA23			blaCMY-2	blaTEM-1		tetA	tetR		tetC			sul1	sul2		floR			fosA
CRJJGF_00041	Cerro	2003	Cattle swab	cattle					I1					colE		aac6-Iy													blaCMY-2
CRJJGF_00042	Muenchen	2010	Ground Turkey	turkey							Q1			colE		aac6-Iy								strA	strB							tetA	tetR						sul2
CRJJGF_00043	Heidelberg				A/C							X1				aac6-Iy								strA	strB		aadB		blaCMY-2	blaTEM-1		tetA	tetR						sul2		floR	cmlA5		fosA
CRJJGF_00044	Johannesburg	2009	Market hog swab	swine					I1							aac6-Iy													blaCMY-2
CRJJGF_00045	Berta	2007	Turkey carcass swab	turkey					I1			X1				aac6-Iy		aac3-VIa								aad1A-pm				blaTEM-1								sul1
CRJJGF_00046	Braenderup	2007	Ground chicken	chicken		F								colE		aac6-Iaa								strA	strB							tetA	tetR
CRJJGF_00047	Braenderup	2002	Dairy cattle	cattle												aac6-Iaa
CRJJGF_00048	Meleagridis	2006	Ground beef	cattle							Q1					aac6-Iy								strA	strB							tetA	tetR						sul2					fosA
CRJJGF_00049	Meleagridis	2008	Ground beef	cattle										colE x 2	colE (mobA)	aac6-Iy																												fosA
CRJJGF_00050	Uganda				A/C											aac6-Iy								strA	strB	aadAB			blaCMY-2			tetA	tetR				tetM	sul1	sul2		floR	cmlA5
CRJJGF_00051	Typhimurium	2004	Swine	swine		F									colE (mob)	aac6-Iaa										aadA2					blaCARB-3		tetR(G)			tetG					floR
CRJJGF_00052	Cholerasuis	2005	Swine	swine		F			I1							aac6-Iaa
CRJJGF_00053	Kentucky	2008	Environmental foam	poultry environmental		F			I1							aac6-Iy								strA	strB							tetA	tetR	tetB
CRJJGF_00054	Untypable	2004	Cattle	cattle										colE	colE (mobA)	aac6-Iy
CRJJGF_00055	Newport	2008	Ground beef	cattle												aac6-Iy
CRJJGF_00056	Enteritidis	2004	Reptile	reptile		F										aac6-Iy
CRJJGF_00057	Kentucky	2005	Young chicken rinse	chicken					I1							aac6-Iy
CRJJGF_00058	Widemarsh	2008	Egg	chicken												aac6-Iy
CRJJGF_00059	IIIa 18:z4,z23:-								I1									aac3-VIa								aad1A-pm												sul1
CRJJGF_00060	Infantis	2006	Chicken	chicken												aac6-Iy
CRJJGF_00061	Kiambu	2004	Cattle	cattle												aac6-Iy
CRJJGF_00062	IIIa 18:z4,z23:-	2008	Ground turkey	turkey	A/C																		aph(3")-Ia	strA	strB				blaCMY-2			tetA	tetR					sul1	sul2		floR							dfrA1
CRJJGF_00063	Brandenburg	2006	Ground beef	cattle				HI2							colE (mobA)	aac6-Iy		aac3-VIa					aph(3")-Ia			aad1A-pm								tetB				sul1
CRJJGF_00064	Brandenburg	2007	Young chicken rinse	chicken												aac6-Iy
CRJJGF_00065	London	2010	Market hog swab	swine							Q1	X1				aac6-Iaa							aph(3")-Ia	strA	strB							tetA	tetR						sul2
CRJJGF_00066	London	2010	Market hog swab	swine												aac6-Iaa
CRJJGF_00067	Adelaide	2010	Steer/Heifer swab	cattle												aac6-Iaa
CRJJGF_00068	Oranienburg	2008	Ground veal	cattle												aac6-Iy
CRJJGF_00069	Anatum	2008	Ground Beef	cattle									pSC101			aac6-Iy																			tetC
CRJJGF_00070	Bovismobificans	2004	Swine	swine				HI2								aac6-Iy			aac-IVa			aph4-Ia		strA	strB					blaTEM-1				tetB					sul2
CRJJGF_00071	Infantis															aac6-Iy
CRJJGF_00072	Give	2008	Ground beef	cattle	A/C											aac6-Iy		aac3-VIa						strA	strB	aadA24			blaCMY-2	blaTEM-1		tetA	tetR				tetM	sul1	sul2		floR
CRJJGF_00073	Give	2004	Swine swab	swine												aac6-Iy
CRJJGF_00074	Havana	2009	Market hog swab	swine					I1					colE x 2	colE (mobA)	aac6-Iy													blaCMY-2
CRJJGF_00075	Bredeney	2005	Turkey	turkey	A/C			HI2	I1					colE x 4	colE x 3	aac6-Iy	aac3-IId							strA	strB	aadA2	aadB		blaCMY-2			tetA	tetRx2		tetC			sul1	sul2									dfrA14
CRJJGF_00076	Bredeney	2008	Ground beef	cattle												aac6-Iy
CRJJGF_00077	Kentucky	2005	Young chicken rinse	chicken		F			I1							aac6-Iy								strA	strB									tetB
CRJJGF_00078	Minnesota	2004	Swine	swine					I1							aac6-Iy													blaCMY-2			tetA	tetR
CRJJGF_00079	Minnesota	2008	Ground turkey	turkey		F										aac6-Iy							aph(3")-Ia	strA	strB									tetB					sul2
CRJJGF_00080	Typhimurium var 5-	2010	Cattle Swab	cattle	A/C	F										aac6-Iaa							aph(3")-Ia	strA	strB	aadA2			blaCMY-2	blaTEM-1		tetA	tetR					sul1	sul2		floR
CRJJGF_00081	Livingstone	2004	Environmental-hall	environmental				HI2						colE x 3	colE (mobA)	aac6-Iaa								strA	strB									tetB
CRJJGF_00082	Javiana									N						aac6-Iy								strA	strB	aad1A-pm				blaTEM-1		tetA	tetR					sul1	sul2			cmlA5			mphA	ereA			arr2
CRJJGF_00083	Newport	2004	Horse	horse	A/C									colE		aac6-Iy		aac3-VIa					aph(3")-Ia	strA	strB	aadA23			blaCMY-2			tetA	tetR					sul1	sul2		floR
CRJJGF_00084	Hartford	2005	Cat	cat												aac6-Iy
CRJJGF_00085	Hartford	2004	Horse	horse					I1							aac6-Iy																			tetC
CRJJGF_00086	Heidelberg	2004	Young chicken rinse	chicken	A/C							X1				aac6-Iy								strA	strB				blaCMY-2	blaTEM-1		tetA	tetR						sul2		floR	cmlA5		fosA
CRJJGF_00087	Litchfield	2006	Ground chicken	chicken					I1							aac6-Iy		aac3-VIa								aad1A-pm												sul1
CRJJGF_00088	Cubana	2004	Swine	swine												aac6-Iy										aadA10						tetA	tetR					sul1
CRJJGF_00089	Tennessee	2004	Swine	swine						N					colE x 2	aac6-Iy										aadA3					blaCARB-3															ereA
CRJJGF_00090	Alachua	2002	Whole eggs	chicken												aac6-Iaa																												fosA
CRJJGF_00091	Alachua	2006	Market hog swab	swine							Q1			colE x 2		aac6-Iaa								strA	strB							tetA	tetR						sul2					fosA
CRJJGF_00092	Aqua	2004	Snake	reptile												aac6-Iy
CRJJGF_00093	Orion	2005	Dog	dog										colE x 2		aac6-Iy
CRJJGF_00094	Orion	2008	Young chicken rinse	chicken		F			I1					colE		aac6-Iy							aph(3")-Ia						blaCMY-2
CRJJGF_00095	Heidelberg	2002	Whole eggs	chicken								X1		colE	colE (mob)	aac6-Iy																												fosA
CRJJGF_00096	Typhimurium	2003	Egg whites	chicken		F										aac6-Iaa
CRJJGF_00097	Bareilly	2010	Ground Beef	cattle											colE (mobA)	aac6-Iy
CRJJGF_00098	IIIb 38:(k):z35	2004	Snake	wild animal								X1		colE	colE (mob)	aac6-Iy																												fosA
CRJJGF_00099	Bardo	2005	Dairy cattle	cattle	A/C									colE		aac6-Iy							aph(3")-Ia	strA	strB				blaCMY-2			tetA	tetR						sul2		floR
CRJJGF_00100	IIIb 48:i:z	2004	Snake	reptile												aac6-Iy
CRJJGF_00101	Lille	2007	Ground Beef	cattle									pSC101	colE		aac6-Iaa																			tetC
CRJJGF_00102	Heidelberg	2004	Cat	cat					I1			X1		colE		aac6-Iy													blaCMY-2															fosA
CRJJGF_00103	Heidelberg	2004	Ground turkey	turkey	A/C				I1			X1		colE	colE (mob)	aac6-Iy		aac3-VIa						strA	strB	aad1A-pm			blaCMY-2			tetA	tetR					sul1	sul2		floR			fosA
CRJJGF_00104	Anatum var. O 15+,34+ (Minneapolis)	2006	Market hog swab	swine								X1		colE	colE (mob)	aac6-Iy																												fosA
CRJJGF_00105	Anatum var. O 15+,34+ (Minneapolis)	2007	Ground turkey	turkey					I1				pSC101	colE x 2	colE (mobA)	aac6-Iy	aac3-IId									aad1A-pm				blaTEM-1		tetA	tetR		tetC
CRJJGF_00106	IIIa 18:z4,z32:-	2008	Ground turkey	turkey	A/C																											tetA	tetR
CRJJGF_00107	IIIb 35:i:z35	2004	Snake	reptile												aac6-Iy
CRJJGF_00108	Miami	2003	Horse	horse												aac6-Iy
CRJJGF_00109	Kentucky	2005	Young chicken rinse	chicken		F			I1							aac6-Iy								strA	strB				blaCMY-2					tetB
CRJJGF_00110	Putten	2005	Swine	swine				HI2		N						aac6-Iy	aac3-IId		aac-IVa			aph4-Ia		strA	strB	aadA8				blaTEM-1				tetB				sul1
CRJJGF_00111	Uganda var. O 15+ (Kinshasa)	2005	Ground beef	cattle	A/C											aac6-Iy								strA	strB	aad1A-pm	aadB	ant(3'')-Ia	blaCMY-2			tetA	tetR					sul1	sul2		floR	cmlA5
CRJJGF_00112	Manhattan	2005	Swine	swine												aac6-Iaa
CRJJGF_00113	Anatum	2008	Ground turkey	turkey					I1							aac6-Iy		aac3-VIa								aad1A-pm				blaTEM-1				tetB				sul1
CRJJGF_00114	Rissen	2004	Ready to eat product	Ready to eat product										colE	colE (mobA)	aac6-Iy																tetA	tetR
CRJJGF_00115	II 48:d:z6 (Hagenbeck)	2005	Environmental	environmental		FV										aac6-Iy								strA	strB														sul2		floR
CRJJGF_00116	Kentucky	2007	Young chicken rinse	chicken		F			I1							aac6-Iy								strA	strB				blaCMY-2					tetB
CRJJGF_00117	Fresno	2004	Lizard	wild animal					I1					colE		aac6-Iy
CRJJGF_00118	Sandeigo	2004	Lizard	wild animal					I1							aac6-Iy
CRJJGF_00119	Thompson	2007	Ground chicken	chicken												aac6-Iy
CRJJGF_00120	Thompson	2005	Young chicken rinse	chicken					I1							aac6-Iy													blaCMY-2
CRJJGF_00121	Anatum	2004	Swine	swine									pSC101			aac6-Iy																			tetC
CRJJGF_00122	Mbandaka	2006	Ground chicken	chicken												aac6-Iaa
CRJJGF_00123	Mbandaka	2010	Market hog	swine												aac6-Iaa
CRJJGF_00124	Senftenberg		Ground beef	cattle					I1					colE	colE (mobA)	aac6-Iy				aphA2	sph																	sul1
CRJJGF_00125	Typhimurium	2008	Cattle	cattle	A/C	F										aac6-Iy								strA	strB	aad1A-pm				blaTEM-1		tetA	tetR					sul1	sul2		floR
CRJJGF_00126	Heidelberg	2010	Turkey carcass swab	turkey	A/C			HI2	I1					colE	colE (mobA)	aac6-Iy		aac3-VIa		aphA2	sph		aph(3")-Ia	strA	strB	aad1A-pm			blaCMY-2			tetA	tetR	tetB				sul1	sul2					fosA
CRJJGF_00127	Kentucky	2007	Young chicken rinse	chicken					I1							aac6-Iy
CRJJGF_00128	Heidelberg	2004	Horse	horse				HI2	I1					colE	colE (mobA)	aac6-Iy				aphA2	sph			strA	strB									tetB										fosA
CRJJGF_00129	Enteritidis	1999	Chicken	chicken		F						X1				aac6-Iy														blaTEM-1		tetA	tetR
CRJJGF_00130	Enteritidis	2006	Young chicken rinse	chicken		F										aac6-Iy
CRJJGF_00131	Enteritidis	2005	Wild mammal	wild animal		F										aac6-Iy
CRJJGF_00132	Typhimurium	2008	Ground beef	cattle	A/C										colE x 2	aac6-Iaa								strA	strB	aadA7			blaCMY-2			tetA	tetR					sul1	sul2		floR
CRJJGF_00133	Montevideo	2011	Ground Beef	cattle						N						aac6-Iy																tetA	tetR											fosA
CRJJGF_00134	Hadar	2006	Turkey carcass swab	turkey					I1			X1		colE		aac6-Iy		aac3-VIa						strA	strB	aad1A-pm				blaTEM-1		tetA	tetR					sul1
CRJJGF_00135	Muenster															aac6-Iy
CRJJGF_00136	Cerro	2007	Market hog swab	swine												aac6-Iaa
CRJJGF_00137	Enteritidis					F										aac6-Iy
CRJJGF_00139	Newport	2002	Dairy cattle	cattle	A/C				I1			X2		colE		aac6-Iy							aph(3")-Ia	strA	strB				blaCMY-2			tetA	tetR						sul2		floR
CRJJGF_00140	Dublin	2007	Ground beef	cattle	A/C	F						X1				aac6-Iy								strA	strB				blaCMY-2			tetA	tetR						sul2		floR
CRJJGF_00141	Worthington	2004	Swine	swine					I1					colE x 2	colE (mobA)	aac6-Iaa																		tetB
CRJJGF_00142	Albany	2009	Turkey Swab	turkey					I1						colE (mobA)	aac6-Iaa		aac3-VIa								aad1A-pm												sul1
CRJJGF_00143	Manhattan	2007	Market hog swab	swine					I1		Q1					aac6-Iaa								strA	strB	aad1A-pm							tetR					sul1	sul2
CRJJGF_00144	Javiana	2004	Dog	dog										colE		aac6-Iy
CRJJGF_00145	Heidelberg	2005	Market hog swab	swine				HI2						colE x 2		aac6-Iy				aphA2	sph			strA	strB									tetB										fosA
CRJJGF_00146	Blockley	2004	Reptile	reptile											colE (mobA)	aac6-Iy
CRJJGF_00147	Blockley	2009	Chicken Rinse	chicken										colE	colE (mobA)	aac6-Iy
CRJJGF_00148	Cholerasuis var. Kunzendorf	2004	Swine	swine		F					Q1					aac6-Iaa								strA	strB									tetB
CRJJGF_00149	Dublin	2007	cattle	cattle		F	HI1					X1				aac6-Iy										aad1A-pm				blaTEM-1				tetB				sul1					catA1
CRJJGF_00150	Dublin	2008	Ground beef	cattle	A/C	F						X1				aac6-Iy							aph(3")-Ia	strA	strB				blaCMY-2	blaTEM-1		tetA	tetR						sul2		floR
CRJJGF_00151	Panama	2005	Unknown	unknown												aac6-Iy
CRJJGF_00152	Rubislaw	2003	Environmental QC	environmental			HI1		I1							aac6-Iy							aph(3")-Ia	strA	strB	aad1A-pm			blaCMY-2	blaTEM-1				tetB				sul1	sul2			cmlA5	catA1		mphA				arr2
CRJJGF_00153	IIIb 58:z52:z35	2004	Snake	reptile											colE (mob)	aac6-Iy
CRJJGF_00154	Krefeld	2004	Swine	swine			HI1		I1							aac6-Iy							aph(3")-Ia			aad1A-pm, aadA2			blaCMY-2					tetB						sul3		cmlA1	catA1				mefB
CRJJGF_00155	Gallinarum var. Pullorum	2004	Avian	avian		F								colE		aac6-Iy
CRJJGF_00156	Ouakam	2004	Young chicken rinse	chicken				HI2								aac6-Iy																		tetB
CRJJGF_00157	Gaminara	2004	Horse	horse												aac6-Iy
CRJJGF_00158	Agona	2005	Ground beef	cattle	A/C											aac6-Iy							aph(3")-Ia	strA	strB				blaCMY-2			tetA	tetR					sul1	sul2		floR			fosA				dfrA1
CRJJGF_00159	Putten	2004	Unknown	unknown				HI2								aac6-Iy			aac-IVa			aph4-Ia				aadA9								tetB				sul1
CRJJGF_00160	Uganda var. O 15+ (Kinshasa)	2004	Ground beef	cattle												aac6-Iy
CRJJGF_00161	Ohio				A/C											aac6-Iy							aph(3")-Ia	strA	strB				blaCMY-2	blaTEM-1		tetA	tetR					sul1	sul2		floR							dfrA1
CRJJGF_00162	Thompson	2007	Ground chicken	chicken												aac6-Iaa
CRJJGF_00163	Orion var. O 15+ (Binza)	2004	Ground beef	cattle										cole x 4	colE (mobA)	aac6-Iy
CRJJGF_00164	Orion var. O 15+ (Binza)	2006	Turkey carcass swab	turkey		FV		HI2						colE		aac6-Iy																		tetB
CRJJGF_00165	IIIb 61:-:1,5,7	2007	Ground beef	cattle								X1				aac6-Iy
CRJJGF_00166	IIIb 61:-:1,5,7	2009	Cattle swab	cattle								X1		colE		aac6-Iy
CRJJGF_00167	Give var. O 15+ (Newbrunswick)	2004	Ground beef	cattle												aac6-Iy
CRJJGF_00168	IIIb 47:k:z35	2004	Snake	reptile										colE		aac6-Iy
CRJJGF_00169	IIIa				A/C	F								colE x 2																		tetA	tetR
CRJJGF_00170	Infantis															aac6-Iy																												fosA
CRJJGF_00171	Enteritidis	2004	Deer	wild animal		F										aac6-Iy
CRJJGF_00172	Schwarzengrund															aac6-Iy
CRJJGF_00173	Heidelberg	2005	Young Chicken	chicken											colE (mobA)	aac6-Iy																												fosA
CRJJGF_00174	Heidelberg	2009	Young Chicken	chicken				HI2	I1					colE	colE (mobA)	aac6-Iy		aac3-VIa		aphA2	sph			strA	strB	aad1A-pm								tetB				sul1						fosA
CRJJGF_00175	Heidelberg	2010	Turkey Carcass	turkey	A/C			HI2	I1					colE	colE (mobA)	aac6-Iy		aac3-VIa		aphA2	sph		aph(3")-Ia	strA	strB	aad1A-pm			blaCMY-2			tetA	tetR	tetB				sul1	sul2					fosA
CRJJGF_00176	Heidelberg	2009	Ground chicken	chicken								X1		colE	colE (mob)	aac6-Iy																												fosA
CRJJGF_00177	Derby	2005	Market hog swab	swine							Q1			colE x 2	colE x 2	aac6-Iy								strA	strB							tetA	tetR						sul2					fosA
CRJJGF_00178	Heidelberg	2001	Ground Turkey	turkey					I1					colE	colE (mobA)	aac6-Iy													blaCMY-2															fosA
CRJJGF_00179	Heidelberg	2004	Ground Turkey	turkey					I1					colE	colE (mobA)	aac6-Iy		aac3-VIa								aad1A-pm												sul1						fosA
CRJJGF_00180	Heidelberg	2005	Ground Turkey	turkey				HI2	I1					colE	colE (mobA)	aac6-Iy		aac3-VIa		aphA2	sph				strB	aad1A-pm						tetA	tetR	tetB				sul1						fosA
CRJJGF_00181	Heidelberg	2006	Turkey Carcass	turkey				HI2						colE	colE (mobA)	aac6-Iy				aphA2	sph				strB									tetB										fosA
CRJJGF_00182	Heidelberg	2007	Young Chicken	chicken					I1					colE	colE (mobA)	aac6-Iy													blaCMY-2															fosA
CRJJGF_00183	Heidelberg	2008	Ground Turkey	turkey					I1					colE	colE (mobA)	aac6-Iy		aac3-VIa								aad1A-pm												sul1						fosA
CRJJGF_00184	Heidelberg	2010	Young Chicken	chicken				HI2							colE (mobA)	aac6-Iy				aphA2	sph			strA	strB									tetB										fosA
CRJJGF_00185	Heidelberg	2010	Turkey Carcass	turkey	A/C			HI2	I1					colE	colE (mobA)	aac6-Iy		aac3-VIa		aphA2	sph			strA	strB	aad1A-pm			blaCMY-2			tetA	tetR	tetB				sul1	sul2					fosA
CRJJGF_00186	Heidelberg	2010	Ground Turkey	turkey				HI2				X1		colE	colE (mobA)	aac6-Iy				aphA2	sph			strA	strB					blaTEM-1				tetB										fosA
CRJJGF_00187	Heidelberg	2010	Ground Turkey	turkey	A/C			HI2	I1					colE x 2	colE (mobA)	aac6-Iy		aac3-VIa		aphA2	sph			strA	strB	aad1A-pm			blaCMY-2			tetA	tetR	tetB				sul1	sul2					fosA
CRJJGF_00188	Heidelberg	2011	Human	human					I1			X1		colE	colE (mobA)	aac6-Iy	aac3-IId							strA	strB	aad1A-pm				blaTEM-1		tetA	tetR											fosA
CRJJGF_00189	Heidelberg	2011	Human	human					I1					colE	colE (mobA)	aac6-Iy	aac3-IId									aad1A-pm				blaTEM-1		tetA	tetR											fosA
CRJJGF_00190	Heidelberg	2011	Human	human					I1			X1		colE	colE (mobA)	aac6-Iy	aac3-IId									aad1A-pm				blaTEM-1		tetA	tetR											fosA
CRJJGF_00191	Heidelberg	2011	Ground Turkey	turkey					I1			X1		colE	colE (mobA)	aac6-Iy	aac3-IId							strA	strB	aad1A-pm				blaTEM-1		tetA	tetR											fosA
CRJJGF_00192	Heidelberg	2011	Ground Turkey	turkey					I1			X1		colE	colE (mobA)	aac6-Iy	aac3-IId							strA	strB	aad1A-pm				blaTEM-1		tetA	tetR											fosA
CRJJGF_00193	Heidelberg	2011	Human feces	human					I1			X1		colE	colE (mobA)	aac6-Iy	aac3-IId							strA	strB	aad1A-pm				blaTEM-1		tetA	tetR											fosA
CRJJGF_00194	Heidelberg	2009	Turkey Carcass	turkey				HI2	I1			X1		colE	colE (mobA)	aac6-Iy	aac3-IId			aphA2	sph			strA	strB	aad1A-pm				blaTEM-1		tetA	tetR	tetB										fosA
CRJJGF_00195	Heidelberg	2011	Human blood	human					I1			X1				aac6-Iy	aac3-IId							strA	strB	aad1A-pm				blaTEM-1		tetA	tetR											fosA
[truncated: 20 more columns]

## Sheet: Supplementary Table 2
Supplementary Table 2. Assembly statistics for 193 retrospective isolates.
Strain ID	Contigs	Scaffolds	Genome Size	Longest Scaffold	N50	Raw reads	EC Reads	% reads passing EC	Raw nucleotides	EC nt	% nt passing EC	Raw cov	Median cov	10th percentile cov	bases >= Q40	assembler version
CRJJGF_00001	112	52	4872258	527929	288028	4862068	4667208	95.99	486206800	439355711	90.36	90.17	95	71	4871255	A5-miseq
CRJJGF_00003	102	36	4956867	1077417	298852	4636874	4459909	96.18	463687400	421468818	90.9	85.03	84	60	4955714	A5-miseq
CRJJGF_00004	52	23	4702868	1634119	406324	3753790	3607951	96.11	375379000	340832626	90.8	72.47	76	59	4702364	A5-miseq
CRJJGF_00005	55	21	4736939	1183739	709162	3928310	3777686	96.17	392831000	357169908	90.92	75.4	80	61	4736434	A5-miseq
CRJJGF_00006	57	22	4678604	1184581	478032	3525518	3384244	95.99	352551800	318944733	90.47	68.17	73	56	4678162	A5-miseq
CRJJGF_00007	70	39	4740677	1161867	439827	2898758	2788896	96.21	289875800	263806141	91.01	55.65	59	43	4735615	A5-miseq
CRJJGF_00008	58	28	4736754	1544548	486871	2845920	2732332	96.01	284592000	258168952	90.72	54.5	58	44	4736044	A5-miseq
CRJJGF_00009	68	28	4706173	1852919	683429	4949056	4760966	96.2	494905600	449744648	90.87	95.56	102	80	4704071	A5-miseq
CRJJGF_00010	65	30	4713125	1224841	649388	3260656	3134377	96.13	326065600	296152348	90.83	62.84	67	51	4711417	A5-miseq
CRJJGF_00011	57	20	4703214	1908228	546559	3813744	3663261	96.05	381374400	345761388	90.66	73.52	78	59	4702840	A5-miseq
CRJJGF_00012	59	27	4711741	1545111	484805	4499690	4330543	96.24	449969000	408823672	90.86	86.77	91	64	4710826	A5-miseq
CRJJGF_00013	324	252	4963106	1233525	655280	3184008	3085991	96.92	318400800	297479551	93.43	59.94	62	43	4864822	A5-miseq
CRJJGF_00014	126	45	4983755	780734	423254	4665220	4480399	96.04	466522000	422783325	90.62	84.83	88	65	4983105	A5-miseq
CRJJGF_00015	104	55	5070187	710962	215003	2745384	2635137	95.98	274538400	248382504	90.47	48.99	49	37	5068156	A5-miseq
CRJJGF_00016	121	53	5039651	601001	250274	3904308	3755228	96.18	390430800	355305961	91	70.5	73	55	5038489	A5-miseq
CRJJGF_00017	156	74	5059039	528111	188215	4418980	4241879	95.99	441898000	400550861	90.64	79.18	82	64	5058215	A5-miseq
CRJJGF_00018	134	68	4979865	567371	223083	4675086	4502889	96.32	467508600	426141350	91.15	85.57	90	70	4979093	A5-miseq
CRJJGF_00019	112	53	5047267	1191359	472489	4145166	3986224	96.17	414516600	376890124	90.92	74.67	78	60	5045393	A5-miseq
CRJJGF_00020	105	49	4927845	879107	274958	4471154	4299503	96.16	447115400	406067863	90.82	82.4	86	66	4927007	A5-miseq
CRJJGF_00021	69	31	4643095	1043912	490428	3727238	3578776	96.02	372723800	336984641	90.41	72.58	76	59	4641050	A5-miseq
CRJJGF_00022	111	41	4935469	950609	465882	4006392	3844459	95.96	400639200	362810565	90.56	73.51	76	58	4934814	A5-miseq
CRJJGF_00023	84	29	4805087	633392	421586	3873210	3720354	96.05	387321000	351720298	90.81	73.2	76	59	4804540	A5-miseq
CRJJGF_00024	88	35	4716151	1644093	471600	3554210	3407282	95.87	355421000	320613206	90.21	67.98	72	55	4714850	A5-miseq
CRJJGF_00025	90	30	4762233	745985	298844	4952102	4754735	96.01	495210200	448562747	90.58	94.19	99	76	4761637	A5-miseq
CRJJGF_00026	60	21	4713676	923651	487972	3843666	3678067	95.69	384366600	344539702	89.64	73.09	79	61	4712480	A5-miseq
CRJJGF_00027	87	44	4974915	931798	367558	4293032	4120703	95.99	429303200	388284876	90.45	78.05	77	61	4974426	A5-miseq
CRJJGF_00028	79	43	5093538	1254049	403431	3650288	3512560	96.23	365028800	332458200	91.08	65.27	64	49	5093022	A5-miseq
CRJJGF_00029	103	43	4999335	742310	297701	3609896	3467743	96.06	360989600	328118001	90.89	65.63	66	51	4998399	A5-miseq
CRJJGF_00030	101	49	4838483	918943	216990	3215358	3077878	95.72	321535800	290422604	90.32	60.02	63	48	4836175	A5-miseq
CRJJGF_00031	75	39	4751972	864271	227176	3866692	3709743	95.94	386669200	350341323	90.6	73.73	76	59	4751565	A5-miseq
CRJJGF_00032	107	48	4917031	564722	278173	3610404	3462679	95.91	361040400	326802055	90.52	66.46	68	53	4915543	A5-miseq
CRJJGF_00033	56	33	4780843	865912	469683	3497128	3361735	96.13	349712800	317977241	90.93	66.51	67	52	4780423	A5-miseq
CRJJGF_00034	68	33	4644541	1270149	512732	3471992	3337081	96.11	347199200	315251759	90.8	67.88	72	56	4644144	A5-miseq
CRJJGF_00035	95	45	4893398	770768	283595	3160306	3036159	96.07	316030600	286726988	90.73	58.59	62	47	4892387	A5-miseq
CRJJGF_00036	86	36	4707569	561529	361129	3406570	3268592	95.95	340657000	308756836	90.64	65.59	69	53	4706902	A5-miseq
CRJJGF_00037	82	37	4875586	1056693	289982	4644920	4504917	96.99	464492000	435016252	93.65	89.22	88	68	4875189	A5-miseq
CRJJGF_00038	75	38	4751116	664103	228326	3749980	3596953	95.92	374998000	338893343	90.37	71.33	76	59	4750281	A5-miseq
CRJJGF_00039	78	31	4928186	790595	490821	3022976	2901530	95.98	302297600	274163479	90.69	55.63	58	44	4927206	A5-miseq
CRJJGF_00040	101	50	5122129	1056681	312551	3166742	3036215	95.88	316674200	287020568	90.64	56.04	56	41	5120904	A5-miseq
CRJJGF_00041	91	31	4659836	1340798	369205	4838316	4693393	97	483831600	452437133	93.51	97.09	97	74	4659425	A5-miseq
CRJJGF_00042	66	30	4787902	772354	558946	3099708	2952444	95.25	309970800	278091723	89.72	58.08	61	47	4787178	A5-miseq
CRJJGF_00043	89	37	4920063	664018	391630	3699138	3555625	96.12	369913800	336060638	90.85	68.3	69	48	4919312	A5-miseq
CRJJGF_00044	86	32	4673314	1056851	486743	3162082	3053025	96.55	316208200	293990436	92.97	62.91	63	50	4672052	A5-miseq
CRJJGF_00045	102	38	4935743	660381	456460	3421212	3323757	97.15	342121200	321542763	93.99	65.15	64	49	4934509	A5-miseq
CRJJGF_00046	77	37	4802694	1186818	409367	3554632	3449270	97.04	355463200	332914740	93.66	69.32	69	53	4801962	A5-miseq
CRJJGF_00047	71	26	4634675	1246270	583384	4108628	3988610	97.08	410862800	385244193	93.76	83.12	85	65	4634270	A5-miseq
CRJJGF_00048	126	52	4914100	901727	401282	3655762	3546782	97.02	365576200	342265723	93.62	69.65	71	53	4913003	A5-miseq
CRJJGF_00049	112	40	4951819	763480	420093	3051578	2951782	96.73	305157800	284969404	93.38	57.55	58	45	0	A5-miseq
CRJJGF_00050	373	253	5208179	431560	129415	3816402	3705026	97.08	381640200	357341663	93.63	68.61	72	49	5172196	A5-miseq
CRJJGF_00051	130	59	4988631	886093	239271	3607756	3503229	97.1	360775600	338636695	93.86	67.88	69	53	4987438	A5-miseq
CRJJGF_00052	387	306	4920743	523941	200761	3273224	3173072	96.94	327322400	306508187	93.64	62.29	65	47	4804652	A5-miseq
CRJJGF_00053	120	52	5032736	445603	234451	3466454	3360698	96.95	346645400	324739062	93.68	64.53	62	46	5031708	A5-miseq
CRJJGF_00054	87	37	4798213	912431	332954	3486738	3381397	96.98	348673800	327083103	93.81	68.17	69	53	4797526	A5-miseq
CRJJGF_00055	74	30	4798039	954402	346942	3043176	2956747	97.16	304317600	286041569	93.99	59.62	61	46	4797293	A5-miseq
CRJJGF_00056	52	18	4703285	1804744	683614	3798628	3687523	97.08	379862800	356200567	93.77	75.73	78	59	4702965	A5-miseq
CRJJGF_00057	106	49	4827876	1335519	238796	3344386	3243780	96.99	334438600	313227799	93.66	64.88	66	49	4827111	A5-miseq
CRJJGF_00058	76	23	4764715	965738	609579	3743028	3635731	97.13	374302800	350762915	93.71	73.62	75	58	4764267	A5-miseq
CRJJGF_00059	127	58	4599743	790107	233567	3193890	3098046	97	319389000	298400647	93.43	64.87	64	48	4597655	A5-miseq
CRJJGF_00060	79	31	4626074	552658	244147	3852640	3739591	97.07	385264000	359455961	93.3	77.7	79	62	4625511	A5-miseq
CRJJGF_00061	102	42	4612109	629100	246027	3520806	3421273	97.17	352080600	330092370	93.75	71.57	73	52	1610736	A5-miseq
CRJJGF_00062	144	74	4651156	377652	135886	3018108	2934814	97.24	301810800	283690618	94	60.99	62	46	4648892	A5-miseq
CRJJGF_00063	77	36	4946454	1132154	275942	3495368	3391952	97.04	349536800	327765253	93.77	66.26	68	51	4945656	A5-miseq
CRJJGF_00064	65	27	4672104	782145	514774	3546612	3442491	97.06	354661200	332442237	93.74	71.15	73	57	4671562	A5-miseq
CRJJGF_00065	80	35	4680363	512466	381075	3559034	3450057	96.94	355903400	332810203	93.51	71.11	71	52	4678070	A5-miseq
CRJJGF_00066	82	35	4632535	477255	307444	3382902	3283067	97.05	338290200	316272349	93.49	68.27	69	49	4631667	A5-miseq
CRJJGF_00067	67	24	4581253	1031743	370316	4440642	4306597	96.98	444064200	415601464	93.59	90.72	93	66	4580897	A5-miseq
CRJJGF_00068	107	29	4965761	697856	322318	5028460	4880228	97.05	502846000	470716138	93.61	94.79	95	69	4965236	A5-miseq
CRJJGF_00069	72	31	4703019	947532	320990	4600246	4470083	97.17	460024600	432150148	93.94	91.89	93	70	4702580	A5-miseq
CRJJGF_00070	89	39	4944065	917631	526726	4816972	4679172	97.14	481697200	452213387	93.88	91.47	93	70	4943618	A5-miseq
CRJJGF_00071	77	32	4612605	648326	373776	5292454	5146589	97.24	529245400	497913820	94.08	107.95	110	84	4612183	A5-miseq
CRJJGF_00072	65	24	4818523	1869754	932829	4867798	4731768	97.21	486779800	457228768	93.93	94.89	97	74	4818211	A5-miseq
CRJJGF_00073	61	24	4626004	1080744	402949	4280082	4156640	97.12	428008200	401403897	93.78	86.77	89	67	4625363	A5-miseq
CRJJGF_00074	94	35	4940818	822361	521716	5531530	5376619	97.2	553153000	519243017	93.87	105.09	104	79	4940474	A5-miseq
CRJJGF_00075	118	63	5165738	632690	270661	4745372	4622241	97.41	474537200	447702023	94.34	86.67	79	58	5165186	A5-miseq
CRJJGF_00076	70	30	4650961	518765	370964	5287578	5134311	97.1	528757800	493658538	93.36	106.14	108	80	4650628	A5-miseq
CRJJGF_00077	128	69	5034281	1149339	237069	4991326	4855393	97.28	499132600	468547851	93.87	93.07	90	66	5032459	A5-miseq
CRJJGF_00078	87	39	4712124	988766	624494	4899958	4683681	95.59	489995800	450459654	91.93	95.6	95	73	4709212	A5-miseq
CRJJGF_00079	91	36	4662255	562836	430017	5142118	4986319	96.97	514211800	478072911	92.97	102.54	100	73	4661079	A5-miseq
CRJJGF_00080	135	61	5166554	600704	248464	4992674	4852903	97.2	499267400	469268402	93.99	90.83	91	68	5165847	A5-miseq
CRJJGF_00081	93	45	4945561	1339762	412582	3205604	3114038	97.14	320560400	301025698	93.91	60.87	58	43	4944154	A5-miseq
CRJJGF_00082	84	30	4726925	876773	460167	3955930	3845317	97.2	395593000	370668537	93.7	78.42	79	60	4726036	A5-miseq
CRJJGF_00083	101	33	5026580	1311931	501858	3436644	3332974	96.98	343664400	322420649	93.82	64.14	64	46	5025634	A5-miseq
CRJJGF_00084	110	44	4789922	619725	255741	3431186	3329134	97.03	343118600	321392871	93.67	67.1	68	48	4788487	A5-miseq
CRJJGF_00085	90	29	4906713	664442	267820	3360940	3259207	96.97	336094000	314782924	93.66	64.15	64	48	4905701	A5-miseq
CRJJGF_00086	97	31	4956686	615131	416224	3773218	3662901	97.08	377321800	353992191	93.82	71.42	72	52	4955713	A5-miseq
CRJJGF_00087	80	34	4750238	608798	223825	3285926	3156232	96.05	328592600	298063700	90.71	62.75	64	46	4749251	A5-miseq
CRJJGF_00088	78	33	4952692	828320	444596	3009994	2896812	96.24	300999400	273851481	90.98	55.29	58	42	4951527	A5-miseq
CRJJGF_00089	92	40	4850564	880610	530174	2822802	2702735	95.75	282280200	254030364	89.99	52.37	53	37	4848733	A5-miseq
CRJJGF_00090	90	33	4876443	705783	504704	3462718	3318015	95.82	346271800	312146287	90.14	64.01	67	49	4873878	A5-miseq
CRJJGF_00091	97	40	4883062	812923	437626	3832064	3677830	95.98	383206400	346490825	90.42	70.96	74	54	4881085	A5-miseq
CRJJGF_00092	225	93	5513378	816110	178640	3702390	3554275	96	370239000	335510017	90.62	60.85	64	44	5510691	A5-miseq
CRJJGF_00093	103	42	4728644	975860	383184	4183624	4017984	96.04	418362400	378752119	90.53	80.1	83	58	4727565	A5-miseq
CRJJGF_00094	124	44	4832802	982173	370828	5038130	4901306	97.28	503813000	474129709	94.11	98.11	94	70	4831130	A5-miseq
CRJJGF_00095	84	34	4762723	946872	254158	4871370	4687945	96.23	487137000	443474464	91.04	93.11	97	72	4762330	A5-miseq
CRJJGF_00096	117	50	4910825	1017379	292953	3540580	3400335	96.04	354058000	320870265	90.63	65.34	69	52	4909416	A5-miseq
CRJJGF_00097	488	210	6165757	514074	147776	3896792	3761078	96.52	389679200	357097304	91.64	57.92	58	42	6159562	A5-miseq
CRJJGF_00098	88	30	4765178	746054	276860	3724272	3574018	95.97	372427200	337387733	90.59	70.8	74	57	4763988	A5-miseq
CRJJGF_00099	106	42	4901540	569317	435361	5050994	4908069	97.17	505099400	474676485	93.98	96.84	96	71	4901137	A5-miseq
CRJJGF_00100	172	66	5425881	903187	267592	3965900	3816957	96.24	396590000	361318731	91.11	66.59	71	53	5423583	A5-miseq
CRJJGF_00101	116	43	5011813	541054	237150	4304692	4138019	96.13	430469200	390858236	90.8	77.99	81	60	5010804	A5-miseq
CRJJGF_00102	116	71	4864501	640170	133073	3595254	3391191	94.32	359525400	316574716	88.05	65.08	67	48	4857650	A5-miseq
CRJJGF_00103	134	69	5095928	431453	170587	3952566	3798649	96.11	395256600	358904616	90.8	70.43	72	51	5093455	A5-miseq
CRJJGF_00104	82	33	4764357	613460	293913	4349054	4178144	96.07	434905400	394623483	90.74	82.83	87	65	4763628	A5-miseq
CRJJGF_00105	134	65	5257577	904505	328883	3642160	3494734	95.95	364216000	329461700	90.46	62.66	65	45	5253457	A5-miseq
CRJJGF_00106	106	62	4594230	448888	150326	3282072	3182432	96.96	328207200	308752452	94.07	67.2	68	52	4593053	A5-miseq
CRJJGF_00107	358	137	5770403	767503	214152	3788362	3678028	97.09	378836200	356874288	94.2	61.85	62	47	5763611	A5-miseq
CRJJGF_00108	117	52	4744816	716282	223880	3975744	3811679	95.87	397574400	357598391	89.95	75.37	78	57	4743427	A5-miseq
CRJJGF_00109	159	80	5021169	401679	172866	3671068	3528728	96.12	367106800	333847781	90.94	66.49	64	48	5020242	A5-miseq
CRJJGF_00110	104	42	5045737	532938	441726	4468030	4289972	96.01	446803000	405350142	90.72	80.34	83	62	5043927	A5-miseq
CRJJGF_00111	74	39	4873508	794739	395216	4120764	3958691	96.07	412076400	373511712	90.64	76.64	79	59	4871748	A5-miseq
CRJJGF_00112	201	160	4756255	1126948	462651	4490624	4320274	96.21	449062400	408531842	90.97	85.89	90	67	4706813	A5-miseq
CRJJGF_00113	62	27	4882693	1142292	537900	4076118	3917786	96.12	407611800	370391807	90.87	75.86	78	60	4882100	A5-miseq
CRJJGF_00114	87	28	4881454	769243	500837	5322970	5105759	95.92	532297000	480429452	90.26	98.42	104	80	4880698	A5-miseq
CRJJGF_00115	526	386	5151227	503347	183790	3933472	3819019	97.09	393347200	369449764	93.92	71.72	73	48	5026989	A5-miseq
CRJJGF_00116	136	58	5016952	738611	290998	3891892	3784371	97.24	389189200	367393821	94.4	73.23	69	53	5015850	A5-miseq
CRJJGF_00117	103	44	4954896	638539	410538	3902616	3792005	97.17	390261600	366857750	94	74.04	72	47	4953070	A5-miseq
CRJJGF_00118	128	57	5286868	540729	231074	3984766	3877256	97.3	398476600	375812504	94.31	71.08	71	50	5285856	A5-miseq
CRJJGF_00119	82	24	4676671	1294208	520796	3675068	3569947	97.14	367506800	346008398	94.15	73.99	76	58	4676024	A5-miseq
CRJJGF_00120	89	27	4775639	1358285	1124960	3489988	3391092	97.17	348998800	328716001	94.19	68.83	69	50	4773940	A5-miseq
CRJJGF_00121	65	30	4730613	663488	331975	3794198	3691219	97.29	379419800	357841969	94.31	75.64	76	54	4730067	A5-miseq
CRJJGF_00122	73	33	4686548	897381	324598	2786834	2709120	97.21	278683400	262677997	94.26	56.05	58	43	4685708	A5-miseq
CRJJGF_00123	121	53	4941368	994704	278137	3674352	3570374	97.17	367435200	346192456	94.22	70.06	72	55	4940136	A5-miseq
CRJJGF_00124	70	25	4892982	1545391	485207	3954206	3842695	97.18	395420600	372443089	94.19	76.12	74	53	4892419	A5-miseq
CRJJGF_00125	120	45	5082403	1272844	291069	4113746	4000226	97.24	411374600	387425967	94.18	76.23	76	55	5080962	A5-miseq
CRJJGF_00126	114	48	5250007	647991	375368	3785522	3679427	97.2	378552200	356516989	94.18	67.91	63	46	5248845	A5-miseq
CRJJGF_00127	103	44	4883947	1435715	386417	3682540	3579206	97.19	368254000	347106563	94.26	71.07	67	49	4883383	A5-miseq
CRJJGF_00128	103	48	5099136	613517	298841	2788844	2708154	97.11	278884400	261872156	93.9	51.36	51	38	5097493	A5-miseq
CRJJGF_00129	55	19	4752848	2057681	684067	3277194	3150134	96.12	327719400	297397547	90.75	62.57	66	48	4752241	A5-miseq
CRJJGF_00130	60	21	4735941	934041	489898	3405976	3271837	96.06	340597600	308096347	90.46	65.05	69	52	4735588	A5-miseq
CRJJGF_00131	66	29	4726662	1689736	879309	5316804	5164947	97.14	531680400	499375215	93.92	105.65	108	85	4723907	A5-miseq
CRJJGF_00132	101	41	4962142	1055990	451729	3878428	3771092	97.23	387842800	365595515	94.26	73.68	72	52	4961250	A5-miseq
CRJJGF_00133	91	37	4629822	772318	477992	3727142	3619709	97.12	372714200	351105666	94.2	75.84	76	60	4628661	A5-miseq
CRJJGF_00134	124	49	4924440	1347277	330029	4024200	3912603	97.23	402420000	379419513	94.28	77.05	71	53	4923363	A5-miseq
CRJJGF_00135	65	31	4673474	696601	389532	3896906	3783175	97.08	389690600	366907619	94.15	78.51	80	64	4672729	A5-miseq
CRJJGF_00136	135	60	4811468	496493	254164	3516046	3418885	97.24	351604600	331624654	94.32	68.92	70	51	4810212	A5-miseq
CRJJGF_00137	67	29	4705400	1422838	546395	3186248	3098718	97.25	318624800	300326810	94.26	63.83	65	47	4704678	A5-miseq
CRJJGF_00139	97	42	5050188	874543	377690	2962936	2873411	96.98	296293600	277657428	93.71	54.98	52	39	5048978	A5-miseq
CRJJGF_00140	74	39	4945237	824648	401337	3768816	3664352	97.23	376881600	355493893	94.33	71.89	73	57	4944702	A5-miseq
CRJJGF_00141	97	26	4963411	1741226	1061419	4056178	3941387	97.17	405617800	382130725	94.21	76.99	75	56	4962625	A5-miseq
CRJJGF_00142	82	21	4858059	941142	509679	3668430	3567606	97.25	366843000	345672717	94.23	71.15	69	50	4857208	A5-miseq
CRJJGF_00143	76	31	4813991	1495269	509836	3751568	3639281	97.01	375156800	351859881	93.79	73.09	69	52	4811263	A5-miseq
CRJJGF_00144	99	39	4593416	963320	421695	3779916	3659779	96.82	377991600	353321550	93.47	76.92	79	63	4591521	A5-miseq
CRJJGF_00145	104	40	5004433	975582	315176	3791390	3685846	97.22	379139000	357282004	94.24	71.39	70	52	5003209	A5-miseq
CRJJGF_00146	303	147	5590686	374987	205934	3973764	3863851	97.23	397376400	374606261	94.27	67.01	64	47	5586736	A5-miseq
CRJJGF_00147	54	28	4743505	1656793	437297	2599790	2490347	95.79	259979000	234719865	90.28	49.48	51	38	4742359	A5-miseq
CRJJGF_00148	99	57	4782672	523989	188836	4194518	4075678	97.17	419451800	394629277	94.08	82.51	80	60	4780585	A5-miseq
CRJJGF_00149	101	56	5084333	403784	215085	3827638	3725556	97.33	382763800	361688809	94.49	71.14	69	54	5083054	A5-miseq
CRJJGF_00150	78	40	4987948	1061968	403695	3822800	3714843	97.18	382280000	360155135	94.21	72.21	67	49	4987178	A5-miseq
CRJJGF_00151	84	34	4611232	1064962	316629	3399416	3303999	97.19	339941600	320528821	94.29	69.51	71	56	4610562	A5-miseq
CRJJGF_00152	140	55	5260082	1159974	269695	3264132	3172048	97.18	326413200	307370841	94.17	58.43	56	39	5258516	A5-miseq
CRJJGF_00153	173	74	5445610	498619	362276	3303956	3212575	97.23	330395600	311953861	94.42	57.29	58	44	5436798	A5-miseq
CRJJGF_00154	144	57	5234401	599132	291624	3332586	3241872	97.28	333258600	314615515	94.41	60.11	59	43	5232843	A5-miseq
CRJJGF_00155	51	22	4745221	2370354	676706	3938538	3823442	97.08	393853800	370414115	94.05	78.06	75	57	4744840	A5-miseq
CRJJGF_00156	111	36	5123172	1025766	298680	3765170	3653793	97.04	376517000	354366298	94.12	69.17	70	56	5122259	A5-miseq
CRJJGF_00157	215	105	5180897	479286	318735	3403082	3305006	97.12	340308200	320568619	94.2	61.88	58	44	5172483	A5-miseq
CRJJGF_00158	106	56	5055729	673856	278703	3701412	3584628	96.84	370141200	346892280	93.72	68.61	69	53	5053419	A5-miseq
CRJJGF_00159	87	37	4934101	628061	413760	3814458	3707870	97.21	381445800	359997100	94.38	72.96	73	56	4931738	A5-miseq
CRJJGF_00160	58	18	4733490	1169609	833773	3486098	3377032	96.87	348609800	327407325	93.92	69.17	71	56	4733049	A5-miseq
CRJJGF_00161	91	42	4961366	769899	404550	3931698	3815974	97.06	393169800	369417823	93.96	74.46	74	56	4960507	A5-miseq
CRJJGF_00162	84	28	4676865	1079758	517964	3344716	3244493	97	334471600	314060114	93.9	67.15	69	52	4675818	A5-miseq
CRJJGF_00163	655	453	5098213	564831	384787	3329126	3224749	96.86	332912600	312251790	93.79	61.25	63	44	4871114	A5-miseq
CRJJGF_00164	121	49	4987600	659295	244587	3314508	3211686	96.9	331450800	311546258	93.99	62.46	60	45	4986528	A5-miseq
CRJJGF_00165	102	66	4814285	402432	267985	3848000	3733823	97.03	384800000	362563927	94.22	75.31	74	57	4808254	A5-miseq
CRJJGF_00166	103	70	4801198	402668	258419	3340208	3227244	96.62	334020800	312660777	93.61	65.12	64	48	4796015	A5-miseq
CRJJGF_00167	64	35	4648059	1264198	443973	3472146	3367277	96.98	347214600	326551742	94.05	70.26	71	55	4644986	A5-miseq
CRJJGF_00168	292	205	5548675	987104	324580	3331332	3213127	96.45	333133200	311193395	93.41	56.08	47	34	5492461	A5-miseq
CRJJGF_00169	479	423	4767375	438347	155797	3673620	3567635	97.11	367362000	346599504	94.35	72.7	75	57	4633153	A5-miseq
CRJJGF_00170	601	387	5186498	683642	129548	2564466	2482467	96.8	256446600	239495374	93.39	46.18	50	17	5118941	A5-miseq
CRJJGF_00171	63	25	4636549	1617194	452673	4423922	4285466	96.87	442392200	412602308	93.27	88.99	90	69	4634213	A5-miseq
CRJJGF_00172	83	33	4774438	1206356	410267	3798674	3683568	96.97	379867400	357146545	94.02	74.8	76	59	4772214	A5-miseq
CRJJGF_00173	82	30	4771521	1356117	332766	2717792	2639800	97.13	271779200	255293926	93.93	53.5	54	41	4770325	A5-miseq
CRJJGF_00174	99	44	5104148	559362	365115	2860762	2780290	97.19	286076200	267426445	93.48	52.39	51	37	5102574	A5-miseq
CRJJGF_00175	109	42	5238790	694207	429522	2860962	2773575	96.95	286096200	267957992	93.66	51.15	49	35	5237089	A5-miseq
CRJJGF_00176	86	29	4765880	1168695	412938	3909994	3802925	97.26	390999400	369268927	94.44	77.48	77	58	4765437	A5-miseq
CRJJGF_00177	138	61	4971699	949752	494863	3175026	3086465	97.21	317502600	299481670	94.32	60.24	49	36	4968503	A5-miseq
CRJJGF_00178	88	34	4866684	694247	291230	3413168	3318897	97.24	341316800	321652252	94.24	66.09	65	47	4864460	A5-miseq
CRJJGF_00179	82	30	4872132	615132	249406	3489430	3390352	97.16	348943000	328336673	94.09	67.39	66	46	4871193	A5-miseq
CRJJGF_00180	105	40	5135741	1638334	239998	3512610	3416397	97.26	351261000	331436821	94.36	64.54	63	48	5134295	A5-miseq
CRJJGF_00181	93	38	4994733	557511	286906	3569672	3466861	97.12	356967200	336269178	94.2	67.32	68	52	4993827	A5-miseq
CRJJGF_00182	102	35	4883746	613600	416249	3471374	3377094	97.28	347137400	327668416	94.39	67.09	60	46	4882667	A5-miseq
CRJJGF_00183	97	31	4876584	726144	298864	3468080	3361222	96.92	346808000	324991113	93.71	66.64	66	47	4875740	A5-miseq
CRJJGF_00184	99	31	5031383	1012675	530851	3176306	3084450	97.11	317630600	298735502	94.05	59.37	59	43	5030170	A5-miseq
CRJJGF_00185	116	53	5244895	608205	231024	3710454	3608803	97.26	371045400	349742210	94.26	66.68	62	44	5243426	A5-miseq
CRJJGF_00186	92	35	5038745	725126	290878	3362202	3270760	97.28	336220200	317558848	94.45	63.02	63	48	5037609	A5-miseq
CRJJGF_00187	121	55	5251589	608826	249354	3609268	3508547	97.21	360926800	340002687	94.2	64.74	61	44	5248411	A5-miseq
CRJJGF_00188	109	43	4929191	797089	299907	3830952	3726860	97.28	383095200	361289033	94.31	73.3	71	51	4928152	A5-miseq
CRJJGF_00189	91	35	4901780	779315	389237	3589298	3490516	97.25	358929800	338397901	94.28	69.04	68	49	4900048	A5-miseq
CRJJGF_00190	91	37	4922783	610860	272070	3432090	3336346	97.21	343209000	323492446	94.26	65.71	64	46	4921533	A5-miseq
CRJJGF_00191	102	47	4915740	613349	293318	3197204	3111012	97.3	319720400	301571699	94.32	61.35	59	41	4914633	A5-miseq
CRJJGF_00192	100	42	4930515	759188	332272	3532664	3429794	97.09	353266400	331950174	93.97	67.33	65	44	4929393	A5-miseq
CRJJGF_00193	111	40	4931605	662902	346109	3840260	3722913	96.94	384026000	360045000	93.76	73.01	72	49	4930694	A5-miseq
CRJJGF_00194	100	38	5148585	853694	343393	3763588	3655556	97.13	376358800	354362499	94.16	68.83	68	48	5147597	A5-miseq
CRJJGF_00195	97	32	4925152	746159	299906	3850246	3740206	97.14	385024600	362167578	94.06	73.53	75	52	4923906	A5-miseq
	115.653	55.3472	4.90361e+06	903027	378743	3.78116e+06	3.65718e+06	96.7199	3.78116e+08	3.50855e+08	92.8019	71.7232	72.3109	53.8705	4.85634e+06
	97	39	4883746	816110	365115	3710454	3579206	97	371045400	345761388	93.71	70.06	71	52	4875740
	82	30	#N/A	#N/A	#N/A	#N/A	#N/A	97.17	#N/A	#N/A	94.26	68.17	69	48	#N/A

## Sheet: Supplementary Table 3
Supplementary Table 3. Isolates containing ColE plasmids with AR genes on the same contig as the replicon gene. *Anatum variant
Isolate	Serotype	Source	Plasmid type	Genotypic profile
CRJJGF_00012	Enteritidis	chicken	colE	blaTEM-1
CRJJGF_00032	Senftenberg	cattle	colE	blaTEM-1
CRJJGF_00069	Anatum	cattle	pSC101	tetC
CRJJGF_00075	Bredeney	turkey	colE	aac3-Iid
CRJJGF_00083	Newport	horse	colE	aph3-Ia
CRJJGF_00099	Bardo	cattle	colE	aph3-Ia
CRJJGF_00101	Lille	cattle	pSC101	tetC
CRJJGF_00105	Minneapolis*	turkey	pSC101	tetC
CRJJGF_00121	Anatum	swine	pSC101	tetC

## Sheet: Supplementary Table 4
Supplementary Table 4. Metadata and AR cassette profile of FSIS isolates positive for at least one cassette. Additional metatdata is available from NCBI Pathogen Browser. Empty cells in the cassette columns indicate that the isolate does not contain that cassette. Colored cells coorespond to plasmid types listed in the key and indicate that the cassette is located on a contig containing a plasmid…
Strain	Serovar	Isolate	Create Date	Location	Isolation Source	Source Category	AMR genotypes	ARC1	ARC2	ARC3	ARC4	ARC5	ARC6
FSIS11703960	8,20:-:z6	PDT000237066.1	2017-08-27T22:38:00Z	USA:KY	comminuted chicken	chicken	aph(3'')-Ib,aph(6)-Id,tet(B)						6 (F)
FSIS11703985	Kentucky	PDT000237089.1	2017-08-27T23:38:16Z	USA:ME	chicken carcass	chicken	aph(3'')-Ib,aph(6)-Id,tet(B)						6 (F)
FSIS11703986	Kentucky	PDT000237081.1	2017-08-27T23:38:15Z	USA:IA	chicken carcass	chicken	aph(3'')-Ib,aph(6)-Id,tet(B)						6 (F)
FSIS11703989	Kentucky	PDT000237087.1	2017-08-27T23:38:16Z	USA:WA	chicken carcass	chicken	aph(3'')-Ib,aph(6)-Id,tet(B)						6 (F)
FSIS11703990	Kentucky	PDT000237090.1	2017-08-27T23:38:16Z	USA:AR	raw intact chicken	chicken	aph(3'')-Ib,aph(6)-Id,tet(B)						6 (F)
FSIS11703991	Reading	PDT000237082.1	2017-08-27T23:38:15Z	USA:MN	Comminuted Turkey	turkey	aph(3'')-Ib,aph(6)-Id,sul2,tet(A)	1 (Q1)
FSIS11703996	Typhimurium	PDT000239143.1	2017-09-06T14:38:42Z	USA:PA	comminuted chicken	chicken	aph(3')-Ia,blaCMY-2,sul2,tet(A)				4
FSIS11704077	Newport	PDT000239183.1	2017-09-06T18:34:36Z	USA:TX	comminuted beef	cattle	aph(3'')-Ib,aph(6)-Id,blaCMY-2,floR,sul2,tet(A)	1 (A/C)			4 (A/C)
FSIS11704100	Kentucky	PDT000239162.1	2017-09-06T15:35:44Z	USA:NJ	chicken carcass	chicken	aph(3'')-Ib,aph(6)-Id,tet(B)						6 (F)
FSIS11704114	Kentucky	PDT000240072.1	2017-09-11T18:35:47Z	USA:ME	chicken carcass	chicken	aph(3'')-Ib,aph(6)-Id,blaCMY-2,tet(B)				4
FSIS11704121	Newport	PDT000247577.1	2017-10-05T00:34:10Z	USA:CA	comminuted beef	cattle	aph(3'')-Ib,aph(6)-Id,blaCMY-2,floR,sul2,tet(A)	1			4
FSIS11704142	Kentucky	PDT000247602.1	2017-10-05T00:34:16Z	USA:GA	chicken carcass	chicken	aph(3'')-Ib,aph(6)-Id,blaCMY-2,tet(B)				4
FSIS11704146	Kentucky	PDT000240698.1	2017-09-14T23:30:05Z	USA:MS	chicken carcass	chicken	aac(3)-VIa,aadA1,aph(3'')-Ib,aph(6)-Id,blaCMY-2,qacEdelta1,sul1,tet(B)				4 (K)		6
FSIS11704260	Kentucky	PDT000240675.1	2017-09-14T23:29:59Z	USA:NY	raw intact chicken	chicken	aph(3'')-Ib,aph(6)-Id,tet(B)						6 (F)
FSIS11704283	Kentucky	PDT000240776.1	2017-09-15T23:32:35Z	USA:MS	raw intact chicken	chicken	aph(3'')-Ib,aph(6)-Id,tet(B)						6 (F)
FSIS11704286	Kentucky	PDT000240788.1	2017-09-15T23:32:37Z	USA:DE	chicken carcass	chicken	aph(3'')-Ib,aph(6)-Id,tet(B)						6 (F)
FSIS11704297	Kentucky	PDT000241368.1	2017-09-19T17:41:26Z	USA:TX	chicken carcass	chicken	aph(3'')-Ib,aph(6)-Id,tet(B)						6 (I1)
FSIS11704298	Kentucky	PDT000241362.1	2017-09-19T17:41:24Z	USA:NY	raw intact chicken	chicken	aph(3'')-Ib,aph(6)-Id,tet(B)						6
FSIS11704303	Kentucky	PDT000241633.1	2017-09-19T21:40:02Z	USA:SC	chicken carcass	chicken	aph(3'')-Ib,aph(6)-Id,tet(B)						6 (F)
FSIS11704366	Kentucky	PDT000241651.1	2017-09-19T22:35:40Z	USA:TX	chicken carcass	chicken	aph(3'')-Ib,aph(6)-Id,tet(B)						6 (F)
FSIS11704416	Kentucky	PDT000245645.1	2017-09-28T16:43:26Z	USA:TX	comminuted chicken	chicken	aph(3'')-Ib,aph(6)-Id,tet(B)						6 (F)
FSIS11704417	Kentucky	PDT000245647.1	2017-09-28T16:43:26Z	USA:GA	raw intact chicken	chicken	aph(3'')-Ib,aph(6)-Id,tet(B)						6 (F)
FSIS11704418	Kentucky	PDT000245650.1	2017-09-28T16:43:27Z	USA:MS	raw intact chicken	chicken	aph(3'')-Ib,aph(6)-Id,tet(B)						6 (F)
FSIS11704439	Kentucky	PDT000245651.1	2017-09-28T16:43:27Z	USA:MS	raw intact chicken	chicken	aph(3'')-Ib,aph(6)-Id,tet(B)						6 (F)
FSIS11704440	Kentucky	PDT000245657.1	2017-09-28T16:43:28Z	USA:FL	raw intact chicken	chicken	aph(3'')-Ib,aph(6)-Id,tet(B)						6
FSIS11704443	Kentucky	PDT000258228.1	2017-10-25T19:44:12Z	USA:AL	raw intact chicken	chicken	aph(3'')-Ib,aph(6)-Id,tet(B)						6 (F)
FSIS11704444	Kentucky	PDT000245649.1	2017-09-28T16:43:27Z	USA:MS	chicken carcass	chicken	aph(3'')-Ib,aph(6)-Id,tet(B)						6
FSIS11704636	Kentucky	PDT000248206.1	2017-10-06T18:31:54Z	USA:TX	chicken carcass	chicken	aph(3'')-Ib,aph(6)-Id,tet(B)						6 (F)
FSIS11704639	Kentucky	PDT000248197.1	2017-10-06T18:31:52Z	USA:GA	comminuted chicken	chicken	aph(3'')-Ib,aph(6)-Id,tet(B)						6 (F)
FSIS11704643	Bovismorbificans	PDT000248207.1	2017-10-06T18:31:54Z	USA:OH	Product-Raw-Ground, Comminuted or Otherwise Nonintact-Pork	swine	tet(B)						6 (F)
FSIS11704650	Newport	PDT000250504.1	2017-10-11T20:39:34Z	USA:TX	comminuted beef	cattle	aph(3'')-Ib,aph(6)-Id,blaCMY-2,floR,sul2,tet(A)				4	5
FSIS11704683	Kentucky	PDT000262685.1	2017-11-09T00:33:45Z	USA:NC	raw intact chicken	chicken	aph(3'')-Ib,aph(6)-Id,tet(B)						6 (F)
FSIS11704684	Infantis	PDT000258227.1	2017-10-25T19:44:12Z	USA:NY	raw intact chicken	chicken	aac(3)-IV,aph(3')-Ia,aph(4)-Ia,blaCTX-M-65,dfrA14,floR,tet(A)					5
FSIS11704688	Infantis	PDT000247580.1	2017-10-05T00:34:11Z	USA:AR	raw intact chicken	chicken	aac(3)-IV,aadA1,aph(3')-Ia,aph(4)-Ia,blaCTX-M-65,floR,fosA3,qacEdelta1,sul1,tet(A)					5
FSIS11704689	Kentucky	PDT000247584.1	2017-10-05T00:34:12Z	USA:CA	raw intact chicken	chicken	aph(3'')-Ib,aph(6)-Id,tet(B)						6 (F)
FSIS11704694	Albany	PDT000247588.1	2017-10-05T00:34:13Z	USA:IN	Comminuted Turkey	turkey	aac(6')-Ib4,aadA1,tet(B)						6
FSIS11704705	Kentucky	PDT000253374.1	2017-10-18T17:36:04Z	USA:WA	raw intact chicken	chicken	aph(3'')-Ib,aph(6)-Id,tet(B)						6 (F)
FSIS11704708	Kentucky	PDT000253361.1	2017-10-18T17:36:01Z	USA:AL	chicken carcass	chicken	aph(3'')-Ib,aph(6)-Id,tet(B)						6 (F)
FSIS11704711	Kentucky	PDT000253378.1	2017-10-18T17:36:05Z	USA:MS	chicken carcass	chicken	aph(3'')-Ib,aph(6)-Id,tet(B)						6
FSIS11704782	Newport	PDT000253401.1	2017-10-18T18:38:20Z	USA:CA	comminuted beef	cattle	aph(3'')-Ib,aph(6)-Id,blaCMY-2,floR,sul2,tet(A)	1			4
FSIS11704783	Newport	PDT000253391.1	2017-10-18T18:38:18Z	USA:CA	comminuted beef	cattle	aph(3'')-Ib,aph(6)-Id,blaCMY-2,floR,sul2,tet(A)	1			4
FSIS11704784	Newport	PDT000253400.1	2017-10-18T18:38:20Z	USA:CA	comminuted beef	cattle	aph(3'')-Ib,aph(6)-Id,blaCMY-2,floR,sul2,tet(A)	1			4
FSIS11704787	Johannesburg	PDT000262680.1	2017-11-09T00:33:44Z	USA:IL	Product-Raw-Ground, Comminuted or Otherwise Nonintact-Pork	swine	aac(3)-IV,aadA7,aph(3')-Ia,aph(4)-Ia,blaTEM-1,bleO,qacEdelta1,qnrB19,sul1,tet(B)						6
FSIS11704791	Kentucky	PDT000262690.1	2017-11-09T00:33:47Z	USA:LA	comminuted chicken	chicken	aph(3'')-Ib,aph(6)-Id,tet(B)						6 (F)
FSIS11704792	Kentucky	PDT000262683.1	2017-11-09T00:33:44Z	USA:MS	chicken carcass	chicken	aph(3'')-Ib,aph(6)-Id,tet(B)						6 (F)
FSIS11704803	Kentucky	PDT000253386.1	2017-10-18T18:38:17Z	USA:NC	raw intact chicken	chicken	aph(3'')-Ib,aph(6)-Id,tet(B)						6 (F)
FSIS11704805	London	PDT000253387.1	2017-10-18T18:38:17Z	USA:TN	Product-Raw-Ground, Comminuted or Otherwise Nonintact-Pork	swine	aph(3'')-Ib,aph(6)-Id,floR,sul2,tet(A)	1
FSIS11704808	Kentucky	PDT000262687.1	2017-11-09T00:33:46Z	USA:TX	comminuted chicken	chicken	aph(3'')-Ib,aph(6)-Id,tet(B)						6 (F)
FSIS11704822	Typhimurium	PDT000262686.1	2017-11-09T00:33:45Z	USA:GA	raw intact chicken	chicken	blaCMY-2,sul2,tet(A)				4
FSIS11704827	Kentucky	PDT000250509.1	2017-10-11T20:39:35Z	USA:CA	comminuted chicken	chicken	aph(3'')-Ib,aph(6)-Id,tet(B)						6 (F)
FSIS11704829	derby	PDT000253364.1	2017-10-18T17:36:01Z	USA:OH	Product-Raw-Ground, Comminuted or Otherwise Nonintact-Pork	swine	fosA7,tet(B)						6
FSIS11704831	Newport	PDT000253379.1	2017-10-18T17:36:05Z	USA:WA	comminuted beef	cattle	aph(3'')-Ib,aph(6)-Id,blaCMY-2,floR,sul2,tet(A)	1			4
FSIS11704837	Kentucky	PDT000258223.1	2017-10-25T19:44:10Z	USA:AL	raw intact chicken	chicken	aph(3'')-Ib,aph(6)-Id,tet(B)						6 (F)
FSIS11704855	Newport	PDT000258240.1	2017-10-25T19:44:14Z	USA:WI	comminuted beef	cattle	aph(3'')-Ib,aph(6)-Id,blaCMY-2,floR,sul2,tet(A)	1			4
FSIS11704856	Newport	PDT000258246.1	2017-10-25T19:44:15Z	USA:ID	comminuted beef	cattle	aph(3'')-Ib,aph(6)-Id,blaCMY-2,floR,sul2,tet(A)	1			4
FSIS11704857	Newport	PDT000258233.1	2017-10-25T19:44:13Z	USA:ID	comminuted beef	cattle	aph(3'')-Ib,aph(6)-Id,blaCMY-2,floR,sul2,tet(A)	1			4
FSIS11704858	Newport	PDT000258242.1	2017-10-25T19:44:14Z	USA:ID	comminuted beef	cattle	aph(3'')-Ib,aph(6)-Id,blaCMY-2,floR,sul2,tet(A)	1			4
FSIS11704859	Newport	PDT000258234.1	2017-10-25T19:44:13Z	USA:ID	comminuted beef	cattle	aph(3'')-Ib,aph(6)-Id,blaCMY-2,floR,sul2,tet(A)	1			4
FSIS11704860	Newport	PDT000258221.1	2017-10-25T19:44:09Z	USA:ID	comminuted beef	cattle	aph(3'')-Ib,aph(6)-Id,blaCMY-2,floR,sul2,tet(A)	1			4
FSIS11704861	Newport	PDT000258243.1	2017-10-25T19:44:15Z	USA:ID	comminuted beef	cattle	aph(3'')-Ib,aph(6)-Id,blaCMY-2,floR,sul2,tet(A)	1			4
FSIS11704862	Newport	PDT000258247.1	2017-10-25T19:44:15Z	USA:ID	comminuted beef	cattle	aph(3'')-Ib,aph(6)-Id,blaCMY-2,floR,sul2,tet(A)	1			4
FSIS11704895	Kentucky	PDT000258237.1	2017-10-25T19:44:14Z	USA:MS	chicken carcass	chicken	aph(3'')-Ib,aph(6)-Id,tet(B)						6
FSIS11704901	Newport	PDT000260966.1	2017-11-03T21:39:04Z	USA:TX	comminuted beef	cattle	aph(3'')-Ib,aph(6)-Id,blaCMY-2,floR,sul2,tet(A)	1			4	5
FSIS11704909	Kentucky	PDT000260810.1	2017-11-03T19:42:37Z	USA:IN	chicken carcass	chicken	aph(3'')-Ib,aph(6)-Id,tet(B)						6 (F)
FSIS11704915	Kentucky	PDT000260812.1	2017-11-03T20:38:02Z	USA:MS	raw intact chicken	chicken	aph(3'')-Ib,aph(6)-Id,tet(B)						6
FSIS11704921	Newport	PDT000260826.1	2017-11-03T21:38:34Z	USA:ID	comminuted beef	cattle	aph(3'')-Ib,aph(6)-Id,blaCMY-2,floR,sul2,tet(A)	1			4	5
FSIS11704922	Newport	PDT000260946.1	2017-11-03T21:39:00Z	USA:ID	comminuted beef	cattle	aph(3'')-Ib,aph(6)-Id,blaCMY-2,floR,sul2,tet(A)	1			4	5
FSIS11704923	Newport	PDT000260943.1	2017-11-03T21:38:59Z	USA:ID	comminuted beef	cattle	aph(3'')-Ib,aph(6)-Id,blaCMY-2,floR,sul2,tet(A)	1			4	5
FSIS11705093	Kentucky	PDT000258768.1	2017-10-27T23:23:01Z	USA:VT	chicken carcass	chicken	aph(3'')-Ib,aph(6)-Id,tet(B)						6
FSIS11705109	Kentucky	PDT000259590.1	2017-10-31T16:42:45Z	USA:AL	raw intact chicken	chicken	aph(3'')-Ib,aph(6)-Id,tet(B)						6 (F)
FSIS11705113	Kentucky	PDT000259621.1	2017-10-31T16:42:57Z	USA:NY	raw intact chicken	chicken	aph(3'')-Ib,aph(6)-Id,blaCMY-2,tet(B)				4
FSIS11705114	Agona	PDT000259601.1	2017-10-31T16:42:49Z	USA:CA	Comminuted Turkey	turkey	fosA7,sul2,tet(B)						6
FSIS11705116	Newport	PDT000259616.1	2017-10-31T16:42:56Z	USA:ID	product-raw-intact-beef	cattle	aph(3'')-Ib,aph(6)-Id,blaCMY-2,floR,sul2,tet(A)	1			4	5
FSIS11705161	Kentucky	PDT000260532.1	2017-11-02T21:38:32Z	USA:AL	raw intact chicken	chicken	aph(3'')-Ib,aph(6)-Id,tet(B)						6 (F)
FSIS11705362	Reading	PDT000260971.1	2017-11-03T21:39:05Z	USA:IA	Comminuted Turkey	turkey	aph(3'')-Ib,aph(6)-Id,blaTEM-1,sul2,tet(A)	1 (Q1)
FSIS11705370	Kentucky	PDT000262662.1	2017-11-09T00:33:39Z	USA:NJ	chicken carcass	chicken	tet(B)						6
FSIS11705375	Kentucky	PDT000262653.1	2017-11-09T00:33:36Z	USA:CA	chicken carcass	chicken	blaCMY-2				4 (I1)
FSIS11705384	Heidelberg	PDT000262671.1	2017-11-09T00:33:41Z	USA:GA	comminuted chicken	chicken	aph(3'')-Ib,aph(3')-IIa,aph(6)-Ic,aph(6)-Id,blaCMY-2,ble,fosA7,tet(B)			3
FSIS11705445	Typhimurium	PDT000262667.1	2017-11-09T00:33:40Z	USA:MA	raw intact chicken	chicken	blaCMY-2,sul2,tet(A)				4
FSIS11705462	brandenburg	PDT000266352.1	2017-11-21T23:37:16Z	USA:CA	Product-Raw-Ground, Comminuted or Otherwise Nonintact-Pork	swine	aac(3)-VIa,aadA1,aph(3')-Ia,qacEdelta1,sul1,tet(B)						6
FSIS11705540	Dublin	PDT000264836.1	2017-11-15T22:39:00Z	USA:CA	comminuted beef	cattle	aph(3'')-Ib,aph(6)-Id,blaCMY-2,floR,sul2,tet(A)	1			4	5
FSIS11705541	Dublin	PDT000264837.1	2017-11-15T22:39:00Z	USA:CA	comminuted beef	cattle	aph(3'')-Ib,aph(6)-Id,blaCMY-2,floR,sul2,tet(A)	1			4	5
FSIS11705542	Newport	PDT000264840.1	2017-11-15T22:39:01Z	USA:MN	comminuted beef	cattle	aph(3'')-Ib,aph(6)-Id,blaCMY,sul2,tet(A)	1			4
FSIS11705543	Newport	PDT000264841.1	2017-11-15T22:39:02Z	USA:TX	comminuted beef	cattle	aph(3'')-Ib,aph(6)-Id,blaCMY-2,floR,sul2,tet(A)	1			4	5
FSIS11705544	Newport	PDT000264844.1	2017-11-15T22:39:02Z	USA:SD	comminuted beef	cattle	aph(3'')-Ib,aph(6)-Id,blaCMY-2,floR,sul2,tet(A)	1 (A/C)			4 (A/C)	5 (A/C)
FSIS11705545	Newport	PDT000264834.1	2017-11-15T22:39:00Z	USA:SD	comminuted beef	cattle	aph(3'')-Ib,aph(6)-Id,blaCMY-2,floR,sul2,tet(A)	1			4
FSIS11705552	Dublin	PDT000264831.1	2017-11-15T20:42:42Z	USA:TX	comminuted beef	cattle	aph(3'')-Ib,aph(6)-Id,floR,qnrB19,sul2,tet(A)	1				5
FSIS11705559	Reading	PDT000268136.1	2017-12-01T05:47:27Z	USA:TX	comminuted beef	cattle	aadA7,aph(3'')-Ib,aph(6)-Id,blaCMY-2,floR,fosA7,qacEdelta1,qnrB19,sul1,sul2,tet(A)	1 (A/C)			4 (A/C)	6 (A/C)
FSIS11705579	Kentucky	PDT000266637.1	2017-11-22T18:44:04Z	USA:SC	chicken carcass	chicken	blaCMY-2				4
FSIS11705584	Kentucky	PDT000264848.1	2017-11-16T00:35:07Z	USA:IA	chicken carcass	chicken	aph(3'')-Ib,aph(6)-Id,tet(B)						6 (F)
FSIS11705702	derby	PDT000265107.1	2017-11-17T00:35:37Z	USA:NE	Product-Raw-Ground, Comminuted or Otherwise Nonintact-Pork	swine	fosA7,tet(B)						6
FSIS11705706	Kentucky	PDT000265102.1	2017-11-17T00:35:36Z	USA:NY	chicken carcass	chicken	aph(3'')-Ib,aph(6)-Id,blaCMY-2,tet(B)				4
FSIS11705709	Heidelberg	PDT000265100.1	2017-11-17T00:35:36Z	USA:UT	Comminuted Turkey	turkey	aac(3)-VIa,aadA1,aph(3'')-Ib,aph(6)-Id,blaCMY-2,floR,fosA7,qacEdelta1,sul1,sul2,tet(A)	1			4	5
FSIS11705713	Kentucky	PDT000265111.1	2017-11-17T00:35:38Z	USA:IL	chicken carcass	chicken	blaCMY-2				4
FSIS11705753	Dublin	PDT000266627.1	2017-11-22T17:39:53Z	USA:ID	comminuted beef	cattle	aph(3'')-Ib,aph(6)-Id,blaCMY-2,floR,sul2,tet(A)	1				5
FSIS11705754	Dublin	PDT000271367.1	2017-12-13T20:50:51Z	USA:ID	comminuted beef	cattle	aph(3'')-Ib,aph(6)-Id,blaCMY-2,floR,sul2,tet(A)	1				5
FSIS11705755	Dublin	PDT000266607.1	2017-11-22T17:39:49Z	USA:ID	comminuted beef	cattle	aph(3'')-Ib,aph(6)-Id,blaCMY-2,floR,sul2,tet(A)	1				5
FSIS11705756	Dublin	PDT000266608.1	2017-11-22T17:39:49Z	USA:ID	comminuted beef	cattle	aph(3'')-Ib,aph(6)-Id,blaCMY-2,blaTEM,floR,sul2,tet(A)	1
FSIS11705757	Dublin	PDT000266622.1	2017-11-22T17:39:52Z	USA:ID	comminuted beef	cattle	aph(3'')-Ib,aph(6)-Id,blaCMY-2,floR,sul2,tet(A)	1				5
FSIS11705899	Dublin	PDT000268122.1	2017-12-01T05:47:24Z	USA:CA	comminuted beef	cattle	blaCMY-2,sul2				4
FSIS11705968	Typhimurium	PDT000267974.1	2017-11-30T20:54:11Z	USA:DE	chicken carcass	chicken	blaCMY-2,sul2,tet(A)				4
FSIS11705973	Heidelberg	PDT000268044.1	2017-11-30T23:47:19Z	USA:NC	Product-Raw-Intact-Pork	swine	aph(3'')-Ib,aph(3')-IIa,aph(6)-Ic,aph(6)-Id,ble,fosA7,tet(B)			3			6
FSIS11705981	Dublin	PDT000268138.1	2017-12-01T05:47:28Z	USA:MN	comminuted beef	cattle	aph(3'')-Ib,aph(6)-Id,floR,sul2,tet(A)	1				5
FSIS11705982	Dublin	PDT000268128.1	2017-12-01T05:47:25Z	USA:MN	comminuted beef	cattle	aph(3'')-Ib,aph(6)-Id,floR,sul2,tet(A)	1				5
FSIS11705983	Dublin	PDT000268139.1	2017-12-01T05:47:28Z	USA:MN	comminuted beef	cattle	aph(3'')-Ib,aph(6)-Id,blaCMY-2,blaTEM,floR,sul2,tet(A)	1				5
FSIS11705988	Infantis	PDT000268154.1	2017-12-01T06:48:44Z	USA:GA	raw intact chicken	chicken	aac(3)-IV,aadA1,aph(3')-Ia,aph(4)-Ia,dfrA14,floR,qacEdelta1,sul1,tet(A)					5
FSIS11706048	Typhimurium	PDT000269855.1	2017-12-07T13:45:15Z	USA:DE	comminuted chicken	chicken	blaCMY-2,sul2,tet(A)				4
FSIS11706052	Dublin	PDT000269722.1	2017-12-06T22:42:31Z	USA:MN	comminuted beef	cattle	aph(3'')-Ib,aph(6)-Id,blaCMY-2,blaTEM,floR,sul2,tet(A)	1
FSIS11706054	Dublin	PDT000269729.1	2017-12-06T22:42:33Z	USA:MN	comminuted beef	cattle	aph(3'')-Ib,aph(3')-Ia,aph(6)-Id,blaCMY-2,blaTEM,floR,sul2,tet(A)	1
FSIS11706055	Dublin	PDT000269727.1	2017-12-06T22:42:33Z	USA:MN	comminuted beef	cattle	aph(3'')-Ib,aph(3')-Ia,aph(6)-Id,blaCMY-2,blaTEM,floR,sul2,tet(A)	1
FSIS11706056	Dublin	PDT000269685.1	2017-12-06T21:43:42Z	USA:MN	comminuted beef	cattle	aph(3'')-Ib,aph(6)-Id,floR,sul2,tet(A)	1
FSIS11706057	Newport	PDT000269728.1	2017-12-06T22:42:33Z	USA:MN	comminuted beef	cattle	aph(3'')-Ib,aph(6)-Id,sul2,tet(A)	1
FSIS11706059	Kentucky	PDT000269692.1	2017-12-06T21:43:44Z	USA:MS	chicken carcass	chicken	aph(3'')-Ib,aph(6)-Id,tet(B)						6
FSIS11706164	derby	PDT000269820.1	2017-12-07T06:47:18Z	USA:VA	Product-Raw-Intact-Pork	swine	fosA7,tet(B)						6
FSIS11706173	Typhimurium	PDT000269805.1	2017-12-07T06:47:14Z	USA:TX	comminuted beef	cattle	aph(3'')-Ib,aph(6)-Id,blaCMY-2,floR,sul2,tet(A)	1			4
FSIS11706188	Dublin	PDT000269853.1	2017-12-07T13:45:14Z	USA:CA	comminuted beef	cattle	aph(3'')-Ib,aph(3')-Ia,aph(6)-Id,blaCMY-2,floR,sul2,tet(A)	1
FSIS11706189	Dublin	PDT000269858.1	2017-12-07T13:45:15Z	USA:CA	comminuted beef	cattle	aph(3'')-Ib,aph(3')-Ia,aph(6)-Id,blaCMY-2,floR,sul2,tet(A)	1				5
FSIS11706191	Dublin	PDT000271362.1	2017-12-13T20:50:48Z	USA:CA	comminuted beef	cattle	aph(3'')-Ib,aph(3')-Ia,aph(6)-Id,blaCMY-2,floR,sul2,tet(A)	1
FSIS11706192	Dublin	PDT000271372.1	2017-12-13T21:47:36Z	USA:CA	comminuted beef	cattle	aph(3'')-Ib,aph(3')-Ia,aph(6)-Id,blaCMY-2,floR,sul2,tet(A)	1
FSIS11706193	Dublin	PDT000271373.1	2017-12-13T21:47:36Z	USA:CA	comminuted beef	cattle	aph(3'')-Ib,aph(3')-Ia,aph(6)-Id,blaCMY-2,floR,sul2,tet(A)	1				5
FSIS11706198	Kentucky	PDT000271562.1	2017-12-14T00:48:28Z	USA:GA	chicken carcass	chicken	aph(3'')-Ib,aph(6)-Id,tet(B)						6
FSIS11706202	Kentucky	PDT000271604.1	2017-12-14T00:48:38Z	USA:MO	chicken carcass	chicken	aph(3'')-Ib,aph(6)-Id,tet(B)						6 (F)
FSIS11706333	Reading	PDT000271738.1	2017-12-14T01:44:01Z	USA:WI	Comminuted Turkey	turkey	aph(3'')-Ib,aph(6)-Id,sul2,tet(A)	1 (Q1)
FSIS11706375	Dublin	PDT000272439.1	2017-12-15T05:54:18Z	USA:CA	comminuted beef	cattle	aph(3'')-Ib,aph(6)-Id,blaCMY-2,floR,sul2,tet(A)	1
FSIS11706376	Dublin	PDT000272440.1	2017-12-15T05:54:18Z	USA:CA	comminuted beef	cattle	aph(3'')-Ib,aph(6)-Id,blaCMY-2,floR,sul2,tet(A)	1
FSIS11706377	Dublin	PDT000272444.1	2017-12-15T05:54:19Z	USA:CA	comminuted beef	cattle	ant(2'')-Ia,aph(3''),aph(3')-Ia,aph(6)-Id,blaCMY-2,blaTEM-1,cmlA5,floR,qacEdelta1,sul2,tet(A)	1			4	5
FSIS11706382	Kentucky	PDT000276997.1	2018-01-09T16:54:50Z	USA:CA	chicken carcass	chicken	aph(3'')-Ib,aph(6)-Id,blaCMY-2,tet(B)				4 (F)
FSIS11706383	Kentucky	PDT000281054.1	2018-01-24T17:56:17Z	USA:MS	comminuted chicken	chicken	aph(3'')-Ib,aph(6)-Id,tet(B)						6 (F)
FSIS11706506	Braenderup	PDT000276966.1	2018-01-09T16:54:44Z	USA:TN	Product-Raw-Ground, Comminuted or Otherwise Nonintact-Pork	swine	tet(B)						6 (I1)
FSIS11706524	Reading	PDT000274660.1	2017-12-27T18:43:50Z	USA:IN	Comminuted Turkey	turkey	aph(3'')-Ib,aph(6)-Id,blaTEM-1,sul2,tet(A)	1 (Q1)
FSIS11706527	Reading	PDT000274669.1	2017-12-27T18:43:52Z	USA:TX	comminuted beef	cattle	aadA7,aph(3'')-Ib,aph(6)-Id,blaCMY-2,floR,fosA7,qacEdelta1,sul1,sul2,tet(A)	1 (A/C)			4 (A/C)
FSIS11706529	Newport	PDT000274663.1	2017-12-27T18:43:51Z	USA:TX	comminuted beef	cattle	aph(3'')-Ib,aph(6)-Id,blaCMY-2,floR,sul2,tet(A)	1			4
FSIS11706648	Dublin	PDT000274593.1	2017-12-27T17:43:55Z	USA:MN	comminuted beef	cattle	aph(3'')-Ib,aph(3')-Ia,aph(6)-Id,blaCMY-2,blaTEM,floR,sul2,tet(A)	1
FSIS11706673	Dublin	PDT000275850.1	2018-01-04T18:40:10Z	USA:IL	comminuted beef	cattle	aph(3'')-Ib,aph(3')-Ia,aph(6)-Id,blaCMY-2,blaTEM,floR,sul2,tet(A)	1
FSIS11706694	Reading	PDT000277702.1	2018-01-10T22:47:03Z	USA:MN	Comminuted Turkey	turkey	aph(3'')-Ib,aph(6)-Id,sul2,tet(A)	1 (Q1)
FSIS11706802	derby	PDT000275954.1	2018-01-04T18:40:39Z	USA:IA	Product-Raw-Ground, Comminuted or Otherwise Nonintact-Pork	swine	fosA7,tet(B)						6
FSIS11706810	Kentucky	PDT000275952.1	2018-01-04T18:40:38Z	USA:GA	chicken carcass	chicken	aph(3'')-Ib,aph(6)-Id,tet(B)						6
FSIS11706835	Typhimurium	PDT000281404.1	2018-01-24T17:57:44Z	USA:GA	raw intact chicken	chicken	blaCMY-2,sul2,tet(A)				4
FSIS11706840	Kentucky	PDT000281406.1	2018-01-24T17:57:44Z	USA:NY	raw intact chicken	chicken	aph(3'')-Ib,aph(6)-Id,tet(B)						6 (F)
FSIS11807008	Kentucky	PDT000281204.1	2018-01-24T17:56:56Z	USA:LA	chicken carcass	chicken	aph(3'')-Ib,aph(6)-Id,tet(B)						6 (F)
FSIS11807131	Kentucky	PDT000282197.1	2018-01-26T23:44:06Z	USA:MS	raw intact chicken	chicken	aph(3'')-Ib,aph(6)-Id,tet(B)						6 (F)
FSIS11807132	Litchfield	PDT000282199.1	2018-01-26T23:44:07Z	USA:MS	chicken carcass	chicken	blaCMY-2				4 (I1)
FSIS11807140	Newport	PDT000282202.1	2018-01-26T23:44:08Z	USA:WI	comminuted beef	cattle	aph(3'')-Ib,aph(6)-Id,blaCMY-2,floR,sul2,tet(A)	1 (A/C)			4 (A/C)	7 (A/C)
FSIS11807141	Newport	PDT000282198.1	2018-01-26T23:44:06Z	USA:WI	comminuted beef	cattle	aph(3'')-Ib,aph(6)-Id,blaCMY-2,floR,sul2,tet(A)	1 (A/C)			4 (A/C)	8 (A/C)
FSIS11807142	Newport	PDT000282195.1	2018-01-26T23:44:05Z	USA:WI	comminuted beef	cattle	aph(3'')-Ib,aph(6)-Id,blaCMY-2,floR,sul2,tet(A)	1 (A/C)			4 (A/C)	9 (A/C)
FSIS11807143	Newport	PDT000282215.1	2018-01-26T23:44:12Z	USA:WI	comminuted beef	cattle	aph(3'')-Ib,aph(6)-Id,blaCMY-2,floR,sul2,tet(A)	1				5
FSIS11807144	Newport	PDT000282217.1	2018-01-27T01:42:37Z	USA:WI	comminuted beef	cattle	aph(3'')-Ib,aph(6)-Id,blaCMY-2,floR,sul2,tet(A)	1 (A/C)			4 (A/C)	10 (A/C)
FSIS11807145	Newport	PDT000282224.1	2018-01-27T01:42:38Z	USA:WI	comminuted beef	cattle	aph(3'')-Ib,aph(6)-Id,blaCMY-2,floR,sul2,tet(A)	1 (A/C)				11 (A/C)
FSIS11807146	Newport	PDT000282214.1	2018-01-26T23:44:11Z	USA:WI	comminuted beef	cattle	aph(3'')-Ib,aph(6)-Id,blaCMY-2,floR,sul2,tet(A),tet(B)	1 (A/C)				12 (A/C)
FSIS11807147	Newport	PDT000282221.1	2018-01-27T01:42:37Z	USA:WI	comminuted beef	cattle	aph(3'')-Ib,aph(6)-Id,blaCMY-2,floR,sul2,tet(A)	1 (A/C)			4 (A/C)	13 (A/C)
FSIS11807149	Newport	PDT000282216.1	2018-01-26T23:44:12Z	USA:WI	comminuted beef	cattle	aph(3'')-Ib,aph(6)-Id,blaCMY-2,floR,sul2,tet(A)	1 (A/C)			4 (A/C)	14 (A/C)
FSIS11807150	Newport	PDT000282220.1	2018-01-27T01:42:37Z	USA:WI	comminuted beef	cattle	aph(3'')-Ib,aph(6)-Id,blaCMY-2,floR,sul2,tet(A)	1 (A/C)			4 (A/C)	15 (A/C)
FSIS11807151	Newport	PDT000282223.1	2018-01-27T01:42:38Z	USA:WI	comminuted beef	cattle	aph(3'')-Ib,aph(6)-Id,blaCMY-2,floR,sul2,tet(A)	1 (A/C)			4 (A/C)	16 (A/C)
FSIS11807152	Newport	PDT000282222.1	2018-01-27T01:42:38Z	USA:WI	comminuted beef	cattle	aph(3'')-Ib,aph(6)-Id,blaCMY-2,floR,sul2,tet(A)	1 (A/C)				17 (A/C)
FSIS11807153	Newport	PDT000282225.1	2018-01-27T01:42:38Z	USA:WI	comminuted beef	cattle	aph(3'')-Ib,aph(6)-Id,blaCMY-2,floR,sul2,tet(A)	1 (A/C)			4 (A/C)	18 (A/C)
FSIS11807154	Newport	PDT000282219.1	2018-01-27T01:42:37Z	USA:WI	comminuted beef	cattle	aph(3'')-Ib,aph(6)-Id,blaCMY-2,floR,sul2,tet(A)	1			4	5
FSIS11807155	Newport	PDT000284853.1	2018-02-05T21:03:16Z	USA:WI	comminuted beef	cattle	aph(3'')-Ib,aph(6)-Id,blaCMY-2,floR,sul2,tet(A)	1			4	5
FSIS11807156	Newport	PDT000281470.1	2018-01-24T17:57:56Z	USA:WI	comminuted beef	cattle	aph(3'')-Ib,aph(6)-Id,blaCMY-2,floR,sul2,tet(A)	1			4	5
FSIS11807157	Newport	PDT000281463.1	2018-01-24T17:57:55Z	USA:WI	comminuted beef	cattle	aph(3'')-Ib,aph(6)-Id,blaCMY-2,floR,sul2,tet(A)	1			4	5
FSIS11807158	Newport	PDT000281471.1	2018-01-24T17:57:56Z	USA:WI	comminuted beef	cattle	aph(3'')-Ib,aph(6)-Id,blaCMY-2,floR,sul2,tet(A)	1			4
FSIS11807160	Newport	PDT000281465.1	2018-01-24T17:57:55Z	USA:WI	comminuted beef	cattle	aph(3'')-Ib,aph(6)-Id,blaCMY-2,floR,sul2,tet(A)	1			4	5
FSIS11807161	Newport	PDT000281467.1	2018-01-24T17:57:56Z	USA:WI	comminuted beef	cattle	aph(3'')-Ib,aph(6)-Id,blaCMY-2,floR,sul2,tet(A)	1			4
FSIS11807162	Newport	PDT000284851.1	2018-02-05T21:03:16Z	USA:WI	comminuted beef	cattle	aph(3'')-Ib,aph(6)-Id,blaCMY-2,floR,sul2,tet(A)	1
FSIS11807163	Newport	PDT000281466.1	2018-01-24T17:57:55Z	USA:WI	comminuted beef	cattle	aph(3'')-Ib,aph(6)-Id,blaCMY-2,floR,sul2,tet(A)	1			4	5
FSIS11807164	Newport	PDT000281472.1	2018-01-24T17:57:56Z	USA:WI	comminuted beef	cattle	aph(3'')-Ib,aph(6)-Id,blaCMY-2,floR,sul2,tet(A)	1			4
FSIS11807165	Newport	PDT000281473.1	2018-01-24T17:57:57Z	USA:WI	comminuted beef	cattle	aph(3'')-Ib,aph(6)-Id,blaCMY-2,floR,sul2,tet(A)	1			4	5
FSIS11807166	Newport	PDT000284858.1	2018-02-05T21:03:17Z	USA:NE	comminuted beef	cattle	aph(3'')-Ib,aph(6)-Id,blaCMY-2,floR,sul2,tet(A)	1			4	5
FSIS11807167	Newport	PDT000281458.1	2018-01-24T17:57:54Z	USA:IL	comminuted beef	cattle	ampC,aph(3'')-Ib,aph(6)-Id,floR,sul2,tet(A)	1
FSIS11807224	Kentucky	PDT000284870.1	2018-02-05T21:03:20Z	USA:NC	raw intact chicken	chicken	aph(3'')-Ib,aph(6)-Id,blaCMY-2,tet(B)				4
FSIS11807303	Dublin	PDT000284117.1	2018-02-03T01:49:46Z	USA:IL	comminuted beef	cattle	aph(3'')-Ib,aph(6)-Id,blaCMY-2,blaTEM,floR,sul2,tet(A)	1			4
FSIS11807400	derby	PDT000285973.1	2018-02-09T02:49:20Z	USA:VA	Product-Raw-Intact-Pork	swine	fosA7,tet(B)						6
FSIS11807402	Dublin	PDT000285981.1	2018-02-09T02:49:21Z	USA:CA	comminuted beef	cattle	aph(3'')-Ib,aph(6)-Id,blaCMY-2,floR,sul2,tet(A)	1			4
FSIS11807403	Dublin	PDT000285982.1	2018-02-09T02:49:21Z	USA:CA	comminuted beef	cattle	aph(3'')-Ib,aph(3')-Ia,aph(6)-Id,blaCMY-2,blaTEM,floR,sul2,tet(A)	1				5
FSIS11807404	Dublin	PDT000285974.1	2018-02-09T02:49:20Z	USA:CA	comminuted beef	cattle	aph(3'')-Ib,aph(3')-Ia,aph(6)-Id,blaCMY-2,blaTEM,floR,sul2,tet(A)	1
FSIS11807559	Agona	PDT000286404.1	2018-02-09T20:55:32Z	USA:OH	Product-Raw-Ground, Comminuted or Otherwise Nonintact-Pork	swine	aac(3)-VIa,aadA25,aph(3'')-Ib,aph(3')-Ia,aph(6)-Id,blaCMY-2,floR,fosA7,qacEdelta1,sul1,sul2,tet(A)	1			4	5
FSIS11807563	Kentucky	PDT000286407.1	2018-02-09T20:55:32Z	USA:LA	comminuted chicken	chicken	aph(3'')-Ib,aph(6)-Id,tet(B)						6 (F)
FSIS11807727	Kentucky	PDT000288605.1	2018-02-23T00:53:21Z	USA:MS	comminuted chicken	chicken	blaCMY-2				4 (I1)
FSIS11807758	Newport	PDT000288633.1	2018-02-23T00:53:28Z	USA:UT	product-raw-intact-beef	cattle	aph(3'')-Ib,aph(6)-Id,blaCMY-2,floR,sul2,tet(A)	1			4
FSIS11807768	Kentucky	PDT000288631.1	2018-02-23T00:53:27Z	USA:NE	comminuted chicken	chicken	aph(3'')-Ib,aph(6)-Id,tet(B)						6 (F)
FSIS11807770	Kentucky	PDT000288619.1	2018-02-23T00:53:25Z	USA:CA	raw intact chicken	chicken	aph(3'')-Ib,aph(6)-Id,tet(B)						6 (F)
FSIS11807772	Kentucky	PDT000288632.1	2018-02-23T00:53:27Z	USA:NY	chicken carcass	chicken	aph(3'')-Ib,aph(6)-Id,blaCMY-2,tet(B)				4		6 (F)
FSIS11807774	Kentucky	PDT000288659.1	2018-02-23T00:53:34Z	USA:IL	chicken carcass	chicken	aph(3'')-Ib,aph(6)-Id,blaCMY-2,tet(B)				4
FSIS11807779	Kentucky	PDT000288680.1	2018-02-23T00:53:38Z	USA:GA	raw intact chicken	chicken	aph(3'')-Ib,aph(6)-Id,blaCMY-2,tet(B)				4 (I1)
FSIS11807907	Kentucky	PDT000291320.1	2018-03-02T16:43:54Z	USA:OH	raw intact chicken	chicken	aph(3'')-Ib,aph(6)-Id,tet(B)						6 (F)
FSIS11807956	Newport	PDT000292833.1	2018-03-07T02:58:39Z	USA:WI	product-raw-intact-beef	cattle	aph(3'')-Ib,aph(6)-Id,blaCMY-2,floR,sul2,tet(A)	1			4	5
FSIS11808094	Typhimurium	PDT000293309.1	2018-03-08T21:50:32Z	USA:TX	comminuted chicken	chicken	blaCMY-2,sul2,tet(A)				4
FSIS11808102	derby	PDT000293257.1	2018-03-08T21:50:21Z	USA:VA	Product-Raw-Ground, Comminuted or Otherwise Nonintact-Pork	swine	fosA7,tet(B)						6 (I1)
FSIS11808106	Dublin	PDT000293292.1	2018-03-08T21:50:28Z	USA:CA	comminuted beef	cattle	aph(3'')-Ib,aph(6)-Id,blaCMY-2,blaTEM,floR,sul2,tet(A)	1
FSIS11808108	Dublin	PDT000293297.1	2018-03-08T21:50:29Z	USA:CA	comminuted beef	cattle	aph(3'')-Ib,aph(6)-Id,blaTEM,floR,sul2,tet(A)	1
FSIS11808109	Dublin	PDT000293267.1	2018-03-08T21:50:23Z	USA:CA	comminuted beef	cattle	aph(3'')-Ib,aph(6)-Id,blaTEM,floR,sul2,tet(A)	1
FSIS11808114	Kentucky	PDT000293276.1	2018-03-08T21:50:25Z	USA:GA	raw intact chicken	chicken	aph(3'')-Ib,aph(6)-Id,tet(B)						6 (F)
FSIS11808119	Dublin	PDT000300053.1	2018-03-27T22:42:08Z	USA:ID	comminuted beef	cattle	aph(3'')-Ib,aph(6)-Id,floR,sul2,tet(A)	1				5
FSIS11808154	derby	PDT000293353.1	2018-03-09T01:49:04Z	USA:WV	Product-Swab-Pork	swine	fosA7,tet(B)						6
FSIS11808155	derby	PDT000293349.1	2018-03-09T01:49:03Z	USA:WV	Product-Swab-Pork	swine	fosA7,tet(B)						6
FSIS11808373	Kentucky	PDT000303154.1	2018-04-03T23:40:26Z	USA:VA	raw intact chicken	chicken	aph(3'')-Ib,aph(6)-Id,tet(B)						6 (F)
FSIS11808389	Dublin	PDT000303128.1	2018-04-03T23:40:21Z	USA:TX	comminuted beef	cattle	aph(3'')-Ib,aph(6)-Id,blaCMY-2,floR,sul2,tet(A)	1			4	5
FSIS11808554	Dublin	PDT000305956.1	2018-04-13T23:47:05Z	USA:CA	comminuted beef	cattle	ant(2'')-Ia,aph(3''),aph(6)-Id,blaCMY-2,cmlA5,floR,qacEdelta1,sul2,tet(A)	1			4	5
FSIS11808686	Montevideo	PDT000303118.1	2018-04-03T23:40:19Z	USA:PA	Comminuted Turkey	turkey	aac(6')-Ib4,aadA1,blaCMY-2				4 (I1)
FSIS11808687	Kentucky	PDT000303111.1	2018-04-03T23:40:18Z	USA:CA	comminuted chicken	chicken	blaCMY-2				4 (I1)
FSIS11808688	Dublin	PDT000303172.1	2018-04-03T23:40:29Z	USA:CA	comminuted beef	cattle	aph(3'')-Ib,aph(3')-Ia,aph(6)-Id,blaCMY-2,blaTEM,floR,sul2,tet(A)	1
FSIS11808689	Dublin	PDT000303160.1	2018-04-03T23:40:27Z	USA:CA	comminuted beef	cattle	aph(3'')-Ib,aph(6)-Id,blaCMY-2,floR,sul2,tet(A)	1				5
FSIS11808690	Dublin	PDT000303122.1	2018-04-03T23:40:20Z	USA:CA	comminuted beef	cattle	aph(3'')-Ib,aph(6)-Id,blaCMY-2,floR,sul2,tet(A)	1				5
FSIS11808691	Dublin	PDT000303163.1	2018-04-03T23:40:27Z	USA:CA	comminuted beef	cattle	aph(3'')-Ib,aph(6)-Id,blaCMY-2,floR,sul2,tet(A)	1
FSIS11808692	Dublin	PDT000305958.1	2018-04-13T23:47:05Z	USA:CA	comminuted beef	cattle	aph(3'')-Ib,aph(6)-Id,blaCMY-2,floR,sul2,tet(A)	1				5
FSIS11808693	Dublin	PDT000303125.1	2018-04-03T23:40:20Z	USA:CA	comminuted beef	cattle	aph(3'')-Ib,aph(6)-Id,floR,sul2,tet(A)	1				5
FSIS11808694	Dublin	PDT000303135.1	2018-04-03T23:40:22Z	USA:CA	comminuted beef	cattle	aph(3'')-Ib,aph(6)-Id,blaCMY-2,blaTEM,floR,sul2,tet(A)	1				5
FSIS11808695	Dublin	PDT000303149.1	2018-04-03T23:40:25Z	USA:CA	comminuted beef	cattle	aph(3'')-Ib,aph(6)-Id,floR,sul2,tet(A)	1				5
FSIS11808696	Dublin	PDT000303164.1	2018-04-03T23:40:27Z	USA:CA	comminuted beef	cattle	aph(3'')-Ib,aph(3')-Ia,aph(6)-Id,blaCMY-2,blaTEM,floR,sul2,tet(A)	1				5
FSIS11808697	Dublin	PDT000303157.1	2018-04-03T23:40:26Z	USA:CA	comminuted beef	cattle	aph(3'')-Ib,aph(6)-Id,floR,sul2,tet(A)	1				5
FSIS11808698	Dublin	PDT000303161.1	2018-04-03T23:40:27Z	USA:CA	comminuted beef	cattle	aph(3'')-Ib,aph(6)-Id,blaCMY-2,floR,sul2,tet(A)	1
FSIS11808699	Dublin	PDT000303167.1	2018-04-03T23:40:28Z	USA:CA	comminuted beef	cattle	aph(3'')-Ib,aph(6)-Id,blaCMY-2,floR,sul2,tet(A)					5
FSIS11808700	Dublin	PDT000303105.1	2018-04-03T23:40:17Z	USA:CA	comminuted beef	cattle	aph(3'')-Ib,aph(6)-Id,blaCMY-2,floR,sul2,tet(A)	1
FSIS11808846	Kentucky	PDT000303607.1	2018-04-05T21:39:49Z	USA:WA	chicken carcass	chicken	aph(3'')-Ib,aph(6)-Id,tet(B)						6 (F)
FSIS11808865	Kentucky	PDT000305415.1	2018-04-11T19:41:56Z	USA:CA	chicken carcass	chicken	aph(3'')-Ib,aph(6)-Id,tet(B)						6
FSIS11808970	Newport	PDT000304082.1	2018-04-07T19:40:57Z	USA:CA	comminuted beef	cattle	aph(3'')-Ib,aph(6)-Id,blaCMY-2,floR,sul2,tet(A)	1			4	5
FSIS1400129	Newport	PDT000076947.1	2015-07-27T22:09:45Z	USA:CA	Comminuted Beef	cattle	aadA,aph(3'')-Ib,aph(6)-Id,blaCMY,blaCMY-2,floR,sul2,tet(A)	1			4	5
FSIS1400138	Newport	PDT000076942.1	2015-07-27T22:09:44Z	USA:CA	Animal-Calf	cattle	aadA,aadA2,aph(3'')-Ib,aph(6)-Id,blaCMY,blaCMY-2,dfrA12,floR,qacEdelta1,sul1,sul2,tet(A)				4
FSIS1400139	Newport	PDT000076949.1	2015-07-27T22:09:45Z	USA:CA	Animal-Calf	cattle	aadA,aadA2,aph(3'')-Ib,aph(3')-Ia,aph(6)-Id,blaCMY,blaCMY-2,floR,qacEdelta1,sul1,sul2,tet(A)				4
FSIS1400258	Heidelberg	PDT000041590.1	2014-10-31T20:07:01Z	USA:PA	chicken carcass	chicken	aadA,aph(3')-II,blaCMY,floR,fosA,tet(A)				4 (I1)	5
FSIS1400280	Dublin	PDT000041588.2	2015-02-10T19:09:54Z	USA:FL	Comminuted poultry	poultry	aadA,aph(3'')-Ib,aph(3')-Ia,aph(6)-Id,blaCMY,blaTEM,floR,sul2,tet(A)	1
FSIS1400417	Heidelberg	PDT000088555.1	2015-10-22T17:17:41Z	USA:CA	NRTE (Not-Ready-to-Eat) Comminuted Poultry Exploratory Sampling - Chickens	chicken	aadA,aph(3'')-Ib,aph(3')-II,aph(6)-Ic,aph(6)-Id,ble,fosA,tet(B)			3			6
FSIS1400418	Heidelberg	PDT000088556.1	2015-10-22T17:17:41Z	USA:CA	NRTE (Not-Ready-to-Eat) Comminuted Poultry Exploratory Sampling - Chickens	chicken	aadA,aph(3'')-Ib,aph(3')-II,aph(6)-Ic,aph(6)-Id,ble,fosA,tet(B)			3			6
FSIS1400419	Heidelberg	PDT000088558.1	2015-10-22T17:17:41Z	USA:CA	NRTE (Not-Ready-to-Eat) Comminuted Poultry Exploratory Sampling - Chickens	chicken	aac(3),aadA,aadA1,aph(3'')-Ib,aph(3')-II,aph(6)-Ic,aph(6)-Id,ble,fosA,qacEdelta1,sul1,tet(B)			3			6
FSIS1400422	Heidelberg	PDT000088568.1	2015-10-22T17:17:42Z	USA:CA	NRTE (Not-Ready-to-Eat) Comminuted Poultry Exploratory Sampling - Chickens	chicken	aadA,aph(3'')-Ib,aph(3')-II,aph(6)-Ic,aph(6)-Id,ble,fosA,tet(B)			3			6
FSIS1400423	Heidelberg	PDT000088566.1	2015-10-22T17:17:42Z	USA:CA	NRTE (Not-Ready-to-Eat) Comminuted Poultry Exploratory Sampling - Chickens	chicken	aac(3),aadA,aadA1,aph(3'')-Ib,aph(3')-II,aph(6)-Ic,aph(6)-Id,ble,fosA,qacEdelta1,sul1,tet(B)			3			6
FSIS1400425	Heidelberg	PDT000088565.1	2015-10-22T17:17:42Z	USA:FL	NRTE (Not-Ready-to-Eat) Comminuted Poultry Exploratory Sampling - Chickens	chicken	aadA,ant(2'')-Ia,aph(3'')-Ib,aph(6)-Id,blaTEM-1,cmlA5,floR,fosA,qacEdelta1,sul2,tet(A)	1				5
FSIS1400426	Heidelberg	PDT000088563.1	2015-10-22T17:17:42Z	USA:MO	NRTE (Not-Ready-to-Eat) Comminuted Poultry Exploratory Sampling - Chickens	chicken	aadA,ant(2'')-Ia,aph(3'')-Ib,aph(6)-Id,blaCMY,cmlA5,fosA,qacEdelta1,sul2				4
FSIS1500990	Kentucky	PDT000072808.1	2015-07-24T20:09:35Z	USA:CO	Chicken Carcass	chicken	aadA,aph(3'')-Ib,aph(6)-Id,tet(B)						6 (F)
FSIS1500992	Senftenberg	PDT000072804.1	2015-07-24T20:09:35Z	USA:UT	NRTE (Not-Ready-to-Eat) Comminuted Poultry Exploratory Sampling - Turkeys	turkey	aadA,aph(3'')-Ib,aph(3')-Ia,aph(6)-Id,floR,sul2,tet(A)	1				5
FSIS1500999	Kentucky	PDT000072807.1	2015-07-24T20:09:35Z	USA:NY	Raw Intact Chicken	chicken	aadA,aph(3'')-Ib,aph(6)-Id,blaTEM-135,tet(B)						6 (F)
FSIS1501002	Kentucky	PDT000076992.1	2015-07-28T19:09:55Z	USA:CA	NRTE (Not-Ready-to-Eat) Comminuted Poultry Exploratory Sampling - Chickens	chicken	aadA,aph(3'')-Ib,aph(6)-Id,tet(B)						6 (F)
FSIS1501007	Kentucky	PDT000067274.1	2015-06-18T10:17:42Z	USA:NY	Raw Intact Chicken	chicken	aadA,aph(3'')-Ib,aph(6)-Id,tet(B)						6 (F)
FSIS1501010	Cerro	PDT000067277.1	2015-06-18T10:17:42Z	USA:CA	NRTE (Not-Ready-to-Eat) Comminuted Poultry Exploratory Sampling - Chickens	chicken	aac(3),aadA,aadA1,aph(3'')-Ib,aph(6)-Id,blaCMY,fosA,qacEdelta1,sul1,tet(A)				4
FSIS1501013	Kentucky	PDT000067280.1	2015-06-18T10:17:42Z	USA:MI	Chicken Carcass	chicken	aadA,aph(3'')-Ib,aph(6)-Id,tet(B)						6 (F)
FSIS1501019	Mbandaka	PDT000067284.1	2015-06-18T10:17:42Z	USA:NC	NRTE (Not-Ready-to-Eat) Comminuted Poultry Exploratory Sampling - Chickens	chicken	aadA,tet(B)						6
FSIS1501020	Kentucky	PDT000067285.1	2015-06-18T10:17:42Z	USA:MS	NRTE (Not-Ready-to-Eat) Comminuted Poultry Exploratory Sampling - Chickens	chicken	aadA,aph(3'')-Ib,aph(6)-Id,tet(B)						6 (F)
FSIS1501023	Kentucky	PDT000067288.1	2015-06-18T10:17:43Z	USA:GA	NRTE (Not-Ready-to-Eat) Comminuted Poultry Exploratory Sampling - Chickens	chicken	aadA,aph(3'')-Ib,aph(6)-Id,tet(B)						6 (F)
FSIS1501035	Schwarzengrund	PDT000069351.1	2015-07-09T05:16:37Z	USA:TN	Raw Intact Chicken	chicken	aac(3)-IId,aadA,aadA2,aph(3'')-Ib,aph(6)-Id,blaTEM-1,dfrA12,mph(A),qacEdelta1,sul1,sul2,tet(B)		2
FSIS1501036	Kentucky	PDT000069352.1	2015-07-09T05:16:37Z	USA:GA	NRTE (Not-Ready-to-Eat) Comminuted Poultry Exploratory Sampling - Chickens	chicken	aadA,aph(3'')-Ib,aph(6)-Id,tet(B)						6 (F)
FSIS1501037	Kentucky	PDT000069353.1	2015-07-09T05:16:37Z	USA:TX	Comminuted Chicken	chicken	aadA,aph(3'')-Ib,aph(6)-Id,tet(B)						6 (F)
FSIS1501040	Newport	PDT000082702.1	2015-09-05T08:10:07Z	USA:MN	Product-Raw-Intact-Beef	cattle	aadA,aph(3'')-Ib,aph(6)-Id,blaCMY,floR,sul2,tet(A)	1
FSIS1501044	Heidelberg	PDT000082705.1	2015-09-05T08:10:07Z	USA:MN	NRTE (Not-Ready-to-Eat) Comminuted Poultry Exploratory Sampling - Turkeys	turkey	aac(3),aadA,aadA1,aph(3'')-Ib,aph(3')-Ia,aph(6)-Id,blaCMY,blaTEM-1,floR,fosA,qacEdelta1,sul1,sul2,tet(A)	1 (I1)			4 (I1)	5(I1)
FSIS1501378	Heidelberg	PDT000072743.1	2015-07-24T14:09:59Z	USA:MN	Animal-Turkey-Turkey Carcass Sponge	turkey	aac(3),aadA,aadA1,aph(3'')-Ib,aph(3')-II,aph(6)-Ic,aph(6)-Id,blaCMY,ble,fosA,qacEdelta1,sul1,sul2,tet(A),tet(B)			3 (HI2)	4
FSIS1501380	Mbandaka	PDT000072748.1	2015-07-24T14:09:59Z	USA:GA	NRTE (Not-Ready-to-Eat) Comminuted Poultry Exploratory Sampling - Chickens	chicken	aadA,tet(B)						6
FSIS1501552	Heidelberg	PDT000072460.1	2015-07-21T19:52:42Z	USA:AR	Raw Intact Chicken	chicken	aadA,blaCMY,fosA				4 (I1)
FSIS1502272	Kentucky	PDT000083315.1	2015-09-16T16:10:58Z	USA:AL	NRTE (Not-Ready-to-Eat) Comminuted Poultry Exploratory Sampling - Chickens	chicken	aadA,aph(3'')-Ib,aph(6)-Id,tet(B)						6 (F)
FSIS1503366	Dublin	PDT000094850.1	2015-11-19T18:19:23Z	USA:CA	Comminuted Beef	cattle	aadA,ant(2'')-Ia,blaCMY,cmlA5,qacEdelta1,sul2				4
FSIS1503367	Dublin	PDT000094848.1	2015-11-19T18:19:23Z	USA:CA	Comminuted Beef	cattle	aadA,aph(3'')-Ib,aph(6)-Id,blaCMY,floR,sul2,tet(A)	1				5
FSIS1503368	Newport	PDT000094855.1	2015-11-19T18:19:23Z	USA:CA	Comminuted Beef	cattle	aadA,aph(3'')-Ib,aph(6)-Id,blaCMY,blaCMY-2,floR,sul2,tet(A)	1			4	5
FSIS1503369	Dublin	PDT000094844.1	2015-11-19T18:19:22Z	USA:CA	Comminuted Beef	cattle	aadA,aph(3'')-Ib,aph(3')-Ia,aph(6)-Id,blaCMY,blaTEM,floR,sul2,tet(A)	1
FSIS1503370	Dublin	PDT000094851.1	2015-11-19T18:19:23Z	USA:CA	Comminuted Beef	cattle	aadA,aph(3'')-Ib,aph(6)-Id,blaCMY,blaTEM,floR,sul2,tet(A)	1				5
FSIS1503371	Dublin	PDT000094849.1	2015-11-19T18:19:23Z	USA:CA	Comminuted Beef	cattle	aadA,aph(3'')-Ib,aph(6)-Id,blaCMY,blaTEM,floR,sul2,tet(A)	1				5
FSIS1503372	Dublin	PDT000094853.1	2015-11-19T18:19:23Z	USA:CA	Comminuted Beef	cattle	aadA,aph(3'')-Ib,aph(6)-Id,blaCMY,blaTEM,floR,sul2,tet(A)	1				5
FSIS1503375	Newport	PDT000094843.1	2015-11-19T18:19:22Z	USA:CA	Comminuted Beef	cattle	aadA,aph(3'')-Ib,aph(6)-Id,blaCMY,blaCMY-2,floR,sul2,tet(A)	1				5
FSIS1503376	Dublin	PDT000094859.1	2015-11-19T19:18:53Z	USA:CA	Comminuted Beef	cattle	aadA,aph(3'')-Ib,aph(6)-Id,blaCMY,blaTEM,floR,sul2,tet(A)	1				5
FSIS1503377	Newport	PDT000094860.1	2015-11-19T19:18:53Z	USA:CA	Comminuted Beef	cattle	aadA,aph(3'')-Ib,aph(6)-Id,blaCMY,blaCMY-2,floR,sul2,tet(A)	1			4	5
FSIS1503378	Newport	PDT000094866.1	2015-11-19T20:19:13Z	USA:CA	Comminuted Beef	cattle	aadA,aph(3'')-Ib,aph(6)-Id,blaCMY,blaCMY-2,floR,sul2,tet(A)	1			4	5
FSIS1503379	Newport	PDT000094861.1	2015-11-19T19:18:53Z	USA:CA	Comminuted Beef	cattle	aadA,aph(3'')-Ib,aph(6)-Id,blaCMY,blaCMY-2,floR,sul2,tet(A)	1			4	5
FSIS1503462	Heidelberg	PDT000095167.1	2015-11-23T23:18:48Z	USA:WA	Raw Intact Chicken	chicken	aadA,blaCMY,fosA				4 (I1)
FSIS1503487	Dublin	PDT000095303.1	2015-11-27T16:18:13Z	USA:CA	Comminuted Beef	cattle	aadA,aph(3'')-Ib,aph(3')-Ia,aph(6)-Id,blaCMY,floR,sul2,tet(A)	1				5
FSIS1503493	Schwarzengrund	PDT000095307.1	2015-11-27T16:18:13Z	USA:GA	Chicken Carcass	chicken	aadA,aph(3'')-Ib,aph(6)-Id,tet(B)						6
FSIS1503631	Typhimurium	PDT000128737.2	2016-05-04T20:14:09Z	USA:MD	Raw Intact Chicken	chicken	aadA,blaCMY,sul2,tet(A)				4
FSIS1503696	Kentucky	PDT000128739.1	2016-05-04T20:14:10Z	USA:MN	Chicken Carcass	chicken	aadA,aph(3'')-Ib,aph(6)-Id,tet(B)						6 (F)
FSIS1503794	Kentucky	PDT000095178.1	2015-11-24T21:19:09Z	USA:TN	Raw Intact Chicken	chicken	aadA,aph(3'')-Ib,aph(6)-Id,tet(B)						6 (F)
FSIS1503809	Typhimurium	PDT000095176.1	2015-11-24T21:19:09Z	USA:PA	Raw Intact Chicken	chicken	aadA,aph(3')-Ia,blaCMY,sul2,tet(A)				4
FSIS1503816	Kentucky	PDT000095174.1	2015-11-24T21:19:09Z	USA:IL	Comminuted Chicken	chicken	aadA,aph(3'')-Ib,aph(6)-Id,tet(B)						6 (F)
FSIS1503819	Montevideo	PDT000095165.1	2015-11-23T23:18:48Z	USA:MI	Animal-Cattle-Heifer	cattle	aadA,tet(B)						6 (I1)
FSIS1503822	Kentucky	PDT000095159.1	2015-11-23T23:18:48Z	USA:MN	Chicken Carcass	chicken	aadA,aph(3'')-Ib,aph(6)-Id,tet(B)						6 (F)
FSIS1503823	Kentucky	PDT000095163.1	2015-11-23T23:18:48Z	USA:TX	Chicken Carcass	chicken	aadA,aph(3'')-Ib,aph(6)-Id,tet(B)						6 (F)
FSIS1503824	Kentucky	PDT000095162.1	2015-11-23T23:18:48Z	USA:GA	Comminuted Chicken	chicken	aadA,aph(3'')-Ib,aph(6)-Id,tet(B)						6 (F)
FSIS1503825	Kentucky	PDT000095160.1	2015-11-23T23:18:48Z	USA:LA	Raw Intact Chicken	chicken	aadA,aph(3'')-Ib,aph(6)-Id,tet(B)						6 (F)
FSIS1503894	London	PDT000082886.1	2015-09-11T22:10:57Z	USA:WA	Animal-Swine-Market Swine	swine	aadA,blaCMY				4 (I1)
FSIS1503898	Typhimurium	PDT000082888.1	2015-09-11T22:10:57Z	USA:KS	Product-Raw-Intact-Beef	cattle	aadA,aph(3'')-Ib,aph(6)-Id,blaCMY,floR,sul2,tet(A)	1			4	5
FSIS1503902	I 4,[5],12:i:-	PDT000083089.1	2015-09-15T20:09:56Z	USA:MN	Comminuted Turkey	turkey	aadA,tet(B)						6 (I1)
FSIS1503963	Typhimurium	PDT000083088.1	2015-09-15T20:09:56Z	USA:ME	Comminuted Chicken	chicken	aadA,aph(3')-Ia,blaCMY,sul2,tet(A)				4
FSIS1503964	Kentucky	PDT000083092.1	2015-09-15T20:09:56Z	USA:ME	Comminuted Chicken	chicken	aadA,aph(3'')-Ib,aph(6)-Id,tet(B)						6 (F)
FSIS1503967	Kentucky	PDT000083086.1	2015-09-15T20:09:56Z	USA:IL	Comminuted Chicken	chicken	aadA,aph(3'')-Ib,aph(6)-Id,tet(B)						6 (F)
FSIS1504007	Kentucky	PDT000083102.1	2015-09-15T20:09:56Z	USA:ME	Comminuted Chicken	chicken	aadA,aph(3'')-Ib,aph(6)-Id,tet(B)						6 (F)
FSIS1504008	Kentucky	PDT000083101.1	2015-09-15T20:09:56Z	USA:ME	Comminuted Chicken	chicken	aadA,aph(3'')-Ib,aph(6)-Id,tet(B)						6 (F)
FSIS1504009	Kentucky	PDT000083047.1	2015-09-15T19:11:14Z	USA:ME	Comminuted Chicken	chicken	aadA,aph(3'')-Ib,aph(6)-Id,tet(B)						6 (F)
FSIS1504094	Typhimurium	PDT000086427.1	2015-10-08T22:16:32Z	USA:ME	Comminuted Chicken	chicken	aadA,blaCMY,sul2,tet(A)				4 (I1)
FSIS1504218	Typhimurium	PDT000086430.1	2015-10-08T22:16:32Z	USA:ME	Comminuted Chicken	chicken	aadA,blaCMY,sul2,tet(A)				4
FSIS1504221	Typhimurium	PDT000084111.1	2015-09-22T20:11:28Z	USA:IL	Environmental: food-contact surface	environment	aadA,blaCMY,sul2,tet(A)				4 (I1)
FSIS1504222	Typhimurium	PDT000086431.1	2015-10-08T22:16:32Z	USA:ME	Comminuted Chicken	chicken	aadA,blaCMY,sul2,tet(A)				4 (I1)
FSIS1504278	Typhimurium	PDT000086429.1	2015-10-08T22:16:32Z	USA:ME	Comminuted Chicken	chicken	aadA,blaCMY,sul2,tet(A)				4
FSIS1504454	Kentucky	PDT000086412.1	2015-10-08T21:16:37Z	USA:ME	Comminuted Chicken	chicken	aadA,aph(3'')-Ib,aph(6)-Id,blaCMY				4 (I1)
FSIS1504496	Kentucky	PDT000086414.1	2015-10-08T21:16:37Z	USA:ME	Comminuted Chicken	chicken	aadA,aph(3'')-Ib,aph(6)-Id,blaCMY,blaCMY-2,tet(B)						6 (F)
FSIS1504497	Kentucky	PDT000084319.1	2015-09-23T19:10:15Z	USA:IL	Comminuted Chicken	chicken	aadA,aph(3'')-Ib,aph(6)-Id,tet(B)						6 (F)
FSIS1504504	Kentucky	PDT000086415.1	2015-10-08T21:16:37Z	USA:ME	Comminuted Chicken	chicken	aadA,aph(3'')-Ib,aph(6)-Id,tet(B)						6 (F)
FSIS1504506	Kentucky	PDT000086410.1	2015-10-08T21:16:37Z	USA:ME	Comminuted Chicken	chicken	aadA,aph(3'')-Ib,aph(6)-Id,tet(B)						6 (F)
FSIS1504508	Kentucky	PDT000088613.1	2015-10-23T22:21:19Z	USA:ME	Comminuted Chicken	chicken	aadA,aph(3'')-Ib,aph(6)-Id,tet(B)						6 (F)
FSIS1504512	Kentucky	PDT000086411.1	2015-10-08T21:16:37Z	USA:ME	Comminuted Chicken	chicken	aadA,aph(3'')-Ib,aph(6)-Id,blaCMY,blaCMY-2,tet(B)						6 (F)
FSIS1504576	Kentucky	PDT000086810.1	2015-10-13T20:17:19Z	USA:ME	Comminuted Chicken	chicken	aadA,aph(3'')-Ib,aph(6)-Id,tet(B)						6 (F)
FSIS1504706	Kentucky	PDT000086823.1	2015-10-13T22:17:56Z	USA:ME	Comminuted Chicken	chicken	aadA,aph(3'')-Ib,aph(6)-Id,tet(B)						6 (F)
FSIS1504772	Heidelberg	PDT000088622.1	2015-10-23T22:21:19Z	USA:ME	Comminuted Chicken	chicken	aadA,blaCMY,fosA				4 (I1)
FSIS1605472	I 4,[5],12:i:-	PDT000102253.1	2016-01-19T19:22:33Z	USA:MN	Comminuted Turkey	turkey	aac(3)-IId,aadA,aadA1,aph(3'')-Ib,aph(3')-Ia,aph(6)-Id,blaTEM-1,sul2,tet(A),tet(B)		2
FSIS1605498	Newport	PDT000103312.1	2016-01-25T18:22:15Z	USA:WI	Comminuted Beef	cattle	aadA,aph(3'')-Ib,aph(6)-Id,blaCMY,floR,sul2,tet(A)	1			4	5
FSIS1605499	Newport	PDT000103314.1	2016-01-25T18:22:15Z	USA:WI	Comminuted Beef	cattle	aadA,aph(3'')-Ib,aph(6)-Id,blaCMY,floR,sul2,tet(A)	1			4	5
FSIS1605500	Newport	PDT000103310.1	2016-01-25T18:22:14Z	USA:WI	Comminuted Beef	cattle	aadA,aph(3'')-Ib,aph(6)-Id,blaCMY,floR,sul2,tet(A)	1			4	5
FSIS1605501	Newport	PDT000103313.1	2016-01-25T18:22:15Z	USA:WI	Comminuted Beef	cattle	aadA,aph(3'')-Ib,aph(6)-Id,blaCMY,floR,sul2,tet(A)	1			4	5
FSIS1605502	Newport	PDT000103311.1	2016-01-25T18:22:14Z	USA:IL	Comminuted Beef	cattle	aadA,aph(3'')-Ib,aph(6)-Id,blaCMY,floR,sul2,tet(A)	1			4	5
FSIS1605503	Newport	PDT000103315.1	2016-01-25T18:22:15Z	USA:CT	Comminuted Beef	cattle	aadA,aph(3'')-Ib,aph(6)-Id,blaCMY,floR,sul2,tet(A)	1			4	5
FSIS1605650	derby	PDT000105835.1	2016-02-06T01:26:01Z	USA:UT	RTE Product	RTE	aadA,fosA,tet(B)						6 (I1)
FSIS1606494	I 4,[5],12:i:-	PDT000128351.1	2016-05-02T19:13:51Z	USA:MO	NRTE (Not-Ready-to-Eat) Comminuted Poultry Exploratory Sampling - Turkeys	turkey	aac(3)-IId,aadA,aph(3'')-Ib,aph(6)-Id,blaCMY,blaTEM-1,tet(A),tet(B)		2		4 (I1)
FSIS1606977	Ohio	PDT000141046.1	2016-07-26T17:17:55Z	USA:NJ	Animal-Calf-Formula-fed Veal	cattle	aac(3),aadA,aadA22,aph(3'')-Ib,aph(3')-Ia,aph(6)-Id,blaCMY,blaTEM,floR,qacEdelta1,sul1,sul2,tet(A)	1			4	5
FSIS1607133	derby	PDT000138875.1	2016-07-18T15:18:45Z	USA:WI	Product-Raw-Ground, Comminuted or Otherwise Nonintact-Pork	swine	fosA,tet(B)						6
FSIS1607153	Reading	PDT000142867.1	2016-08-03T03:14:50Z	USA:KS	Product-Raw-Intact-Beef	cattle	aadA,aph(3'')-Ib,aph(6)-Id,blaCMY,floR,fosA,qnrB19,sul2,tet(A)				4
FSIS1607242	I 4,[5],12:i:-	PDT000143175.1	2016-08-03T19:18:46Z	USA:WI	Comminuted Turkey	turkey	aac(3),aadA,aadA1,aph(3'')-Ib,aph(3')-Ia,aph(6)-Id,blaCMY,blaTEM-1,floR,qacEdelta1,sul1,sul2,tet(A),tet(B)	1			4
FSIS1607512	Heidelberg	PDT000148534.1	2016-09-09T20:17:10Z	USA:TX	Comminuted Beef	cattle	aadA,aadA22,aph(3'')-Ib,aph(3')-Ia,aph(6)-Id,blaCMY,floR,fosA,qacEdelta1,sul1,sul2,tet(A),tet(B),tet(O)	1			4
FSIS1607516	Heidelberg	PDT000148539.1	2016-09-10T00:16:47Z	USA:TX	Comminuted Beef	cattle	aadA,aadA22,aph(3'')-Ib,aph(3')-Ia,aph(6)-Id,blaCMY,floR,fosA,qacEdelta1,sul1,sul2,tet(A),tet(B),tet(O)	1			4
FSIS1607517	I 4,[5],12:i:-	PDT000148530.1	2016-09-09T19:17:46Z	USA:MI	Product-Raw-Ground, Comminuted or Otherwise Nonintact-Pork	swine	aadA,aadA2,aph(3'')-Ib,aph(6)-Id,blaCMY,blaTEM-1,dfrA12,floR,qacEdelta1,sul1,sul2,tet(A)				4
FSIS1607808	Kentucky	PDT000152284.1	2016-10-12T23:20:16Z	USA:WA	Raw Intact Chicken	chicken	aadA,aph(3'')-Ib,aph(6)-Id,blaCMY,blaCMY-2,qnrB19,tet(B)				4
FSIS1607809	Newport	PDT000152282.1	2016-10-12T23:20:16Z	USA:TX	Comminuted Beef	cattle	aadA,aph(3'')-Ib,aph(6)-Id,blaCMY,floR,qnrB19,sul2,tet(A)	1			4	5
FSIS1608089	Anatum	PDT000156699.1	2016-11-05T00:19:18Z	USA:PA	Comminuted Beef	cattle	aadA,aadA2,dfrA12,floR,qacEdelta1,qnrB19,sul1,tet(A)					5
FSIS1608128	Kentucky	PDT000158970.1	2016-11-15T06:18:59Z	USA:GA	Raw Intact Chicken	chicken	aadA,aph(3'')-Ib,aph(6)-Id,tet(B)						6 (F)
FSIS1608142	Schwarzengrund	PDT000158961.1	2016-11-15T06:18:58Z	USA:MI	Comminuted Turkey	turkey	aac(3)-IId,aadA,aadA1,blaTEM-1,tet(A)		2
FSIS1608152	Typhimurium	PDT000156336.1	2016-11-04T21:20:25Z	USA:MA	Raw Intact Chicken	chicken	aadA,blaCMY,sul2,tet(A)				4
FSIS1608204	Anatum	PDT000156293.1	2016-11-04T21:20:18Z	USA:WI	Product-Raw-Ground, Comminuted or Otherwise Nonintact-Pork	swine	aadA,blaCMY,tet(C)				4 (I1)
FSIS1608206	Kentucky	PDT000156292.1	2016-11-04T21:20:17Z	USA:CA	Comminuted Chicken	chicken	aadA,aph(3'')-Ib,aph(6)-Id,tet(B)						6 (F)
FSIS1608232	Dublin	PDT000157644.1	2016-11-08T23:18:28Z	USA:CA	Comminuted Beef	cattle	aadA,aph(3'')-Ib,aph(6)-Id,floR,sul2,tet(A)	1
FSIS1608233	Dublin	PDT000157646.1	2016-11-08T23:18:28Z	USA:CA	Comminuted Beef	cattle	aadA,aph(3'')-Ib,aph(6)-Id,floR,sul2,tet(A)	1
FSIS1608234	Dublin	PDT000157648.1	2016-11-08T23:18:28Z	USA:CA	Comminuted Beef	cattle	aadA,aph(3'')-Ib,aph(6)-Id,floR,sul2,tet(A)	1
FSIS1608236	Dublin	PDT000157643.1	2016-11-08T23:18:28Z	USA:CA	Comminuted Beef	cattle	aadA,aph(3'')-Ib,aph(3')-Ia,aph(6)-Id,blaCMY,floR,sul2,tet(A)	1
FSIS1608254	derby	PDT000157462.1	2016-11-07T19:17:09Z	USA:KY	Product-Raw-Intact-Pork	swine	aadA,fosA,tet(B)						6
FSIS1608273	derby	PDT000157660.1	2016-11-08T23:18:30Z	USA:WI	Product-Raw-Ground, Comminuted or Otherwise Nonintact-Pork	swine	aadA,fosA,tet(B)						6
FSIS1608278	Heidelberg	PDT000157661.1	2016-11-08T23:18:30Z	USA:VA	Product-Raw-Intact-Beef	cattle	aadA,aph(3'')-Ib,aph(3')-IIa,aph(6)-Ic,aph(6)-Id,ble,fosA,tet(B)			3			6
FSIS1608290	Typhimurium	PDT000157651.1	2016-11-08T23:18:29Z	USA:NJ	Raw Intact Chicken	chicken	aadA,aph(3')-Ia,blaCMY,sul2,tet(A)				4
FSIS1608292	Dublin	PDT000157454.1	2016-11-07T19:17:07Z	USA:MN	Comminuted Beef	cattle	aadA,aph(3'')-Ib,aph(6)-Id,floR,sul2,tet(A)	1				5
FSIS1608310	Kentucky	PDT000157438.1	2016-11-07T19:17:05Z	USA:MO	Raw Intact Chicken	chicken	aadA,aph(3'')-Ib,aph(6)-Id,tet(B)						6 (F)
FSIS1608405	Kentucky	PDT000159041.1	2016-11-15T12:17:18Z	USA:MN	Raw Intact Chicken	chicken	aadA,aph(3'')-Ib,aph(6)-Id,tet(B)						6 (F)
FSIS1608419	Uganda	PDT000171512.1	2016-12-13T16:33:01Z	USA:NC	Product-Raw-Ground, Comminuted or Otherwise Nonintact-Pork	swine	aadA,tet(B)						6
FSIS1608435	Kentucky	PDT000162328.1	2016-11-21T22:19:19Z	USA:MS	Chicken Carcass	chicken	aadA,aph(3'')-Ib,aph(6)-Id,tet(B)						6
FSIS1608437	Kentucky	PDT000159054.1	2016-11-15T13:14:58Z	USA:CA	Comminuted Chicken	chicken	aadA,aph(3'')-Ib,aph(6)-Id,tet(B)						6 (F)
FSIS1608441	Kentucky	PDT000159051.1	2016-11-15T13:14:57Z	USA:MI	Product-Raw-Intact-Beef	cattle	aadA,aph(3'')-Ib,aph(6)-Id,tet(B)						6 (F)
FSIS1608443	Dublin	PDT000162681.1	2016-11-22T19:19:14Z	USA:NC	Comminuted Beef	cattle	aadA,aph(3'')-Ib,aph(3')-Ia,aph(6)-Id,blaCMY,floR,sul2,tet(A)	1				5
FSIS1608447	Schwarzengrund	PDT000162682.1	2016-11-22T19:19:14Z	USA:AL	Raw Intact Chicken	chicken	aac(3)-IId,aadA,aadA2,aph(3'')-Ib,aph(6)-Id,blaTEM-1,dfrA12,mph(A),qacEdelta1,sul1,sul2,tet(B)		2
FSIS1608449	Heidelberg	PDT000162684.1	2016-11-22T19:19:14Z	USA:AL	Chicken Carcass	chicken	aadA,aph(3'')-Ib,aph(3')-IIa,aph(3')-Ia,aph(6)-Ic,aph(6)-Id,ble,fosA,tet(A),tet(B)			3			6
FSIS1608450	London	PDT000162685.1	2016-11-22T19:19:14Z	USA:AR	Comminuted Turkey	turkey	aac(3)-IId,aadA,aadA1,blaTEM-1,tet(A),tet(B)		2
FSIS1608483	derby	PDT000162385.1	2016-11-22T00:19:36Z	USA:VA	Product-Raw-Intact-Pork	swine	aadA,fosA,tet(B)						6
FSIS1608503	Mbandaka	PDT000162375.1	2016-11-21T23:20:13Z	USA:OK	Product-Raw-Ground, Comminuted or Otherwise Nonintact-Pork	swine	aadA,aadA2,aph(3')-IIa,aph(6)-Ic,ble,lnu(B),qacEdelta1,sul1,tet(B)			3
FSIS1608507	Kentucky	PDT000159056.1	2016-11-15T13:14:58Z	USA:PA	Product-Raw-Otherwise Processed-Chicken	chicken	aadA,aph(3'')-Ib,aph(6)-Id,tet(B)						6 (F)
FSIS1608663	Kentucky	PDT000162700.1	2016-11-22T20:18:38Z	USA:NY	Raw Intact Chicken	chicken	aadA,aph(3'')-Ib,aph(6)-Id,blaCMY,tet(B)				4
FSIS1608664	Reading	PDT000162698.1	2016-11-22T20:18:38Z	USA:MN	Comminuted Turkey	turkey	aadA,aph(3'')-Ib,aph(6)-Id,sul2,tet(A)	1 (Q1)
FSIS1608675	Typhimurium	PDT000173422.1	2016-12-19T19:30:12Z	USA:DE	Raw Intact Chicken	chicken	aadA,blaCMY-2,sul2,tet(A)				4
FSIS1608683	Uganda	PDT000167493.1	2016-12-05T05:31:45Z	USA:WI	Product-Raw-Ground, Comminuted or Otherwise Nonintact-Pork	swine	aadA,blaCMY				4
FSIS1608686	Kentucky	PDT000167497.1	2016-12-05T05:31:46Z	USA:NY	Raw Intact Chicken	chicken	aadA,aph(3'')-Ib,aph(6)-Id,tet(B)						6 (F)
FSIS1608815	Kentucky	PDT000167731.1	2016-12-05T23:31:35Z	USA:NC	Raw Intact Chicken	chicken	aac(3)-IId,aadA,aph(3'')-Ib,aph(6)-Id,blaTEM-1		2 (F)
FSIS1608832	Kentucky	PDT000167745.1	2016-12-06T00:30:12Z	USA:NC	Chicken Carcass	chicken	aadA,aph(3'')-Ib,aph(6)-Id,blaCMY,tet(B)				4
FSIS1608868	Typhimurium	PDT000167774.1	2016-12-06T16:31:45Z	USA:NJ	Comminuted Chicken	chicken	aadA,blaCMY,sul2,tet(A)				4
FSIS1608871	Heidelberg	PDT000167748.1	2016-12-06T00:30:12Z	USA:VA	Comminuted Chicken	chicken	aadA,aph(3'')-Ib,aph(3')-IIa,aph(6)-Ic,aph(6)-Id,blaCMY,ble,fosA,tet(B)			3	4 (I1)		6
FSIS1608874	Kentucky	PDT000171771.1	2016-12-14T00:30:34Z	USA:NC	Raw Intact Chicken	chicken	aadA,aph(3'')-Ib,aph(6)-Id,tet(B)						6 (F)
FSIS1608936	Schwarzengrund	PDT000168353.1	2016-12-09T03:33:11Z	USA:MO	Comminuted Turkey	turkey	aac(3)-IId,aadA,aadA1,blaTEM-1,tet(A)		2
FSIS1608938	Dublin	PDT000168352.1	2016-12-09T03:33:10Z	USA:WI	Comminuted Beef	cattle	aadA,aph(3'')-Ib,aph(6)-Id,blaCMY,blaTEM,floR,sul2,tet(A)	1				5
FSIS1608941	Typhimurium	PDT000168351.1	2016-12-09T03:33:10Z	USA:DE	Chicken Carcass	chicken	aadA,blaCMY,sul2,tet(A)				4
FSIS1608972	I 4,[5],12:i:-	PDT000168336.1	2016-12-08T22:33:20Z	USA:NY	Product-Raw-Intact-Beef	cattle	aadA,blaCMY				4 (I1)
FSIS1608990	Newport	PDT000171716.1	2016-12-13T23:31:41Z	USA:PA	Product-Raw-Intact-Beef	cattle	aadA,aph(3'')-Ib,aph(6)-Id,blaCMY,floR,sul2,tet(A)	1			4	5
FSIS1608995	Kentucky	PDT000171715.1	2016-12-13T23:31:40Z	USA:PA	Comminuted Chicken	chicken	aadA,blaCMY				4 (I1)
FSIS1608997	Kentucky	PDT000171713.1	2016-12-13T23:31:40Z	USA:CA	Chicken Carcass	chicken	aadA,aph(3'')-Ib,aph(6)-Id,tet(B)						6 (F)
FSIS1609053	Kentucky	PDT000171725.1	2016-12-13T23:31:43Z	USA:IL	Raw Intact Chicken	chicken	aadA,aph(3'')-Ib,aph(6)-Id,tet(B)						6 (F)
FSIS1609058	Kentucky	PDT000171732.1	2016-12-13T23:31:45Z	USA:GA	Raw Intact Chicken	chicken	aadA,aph(3'')-Ib,aph(6)-Id,tet(B)						6 (F)
FSIS1609085	Kentucky	PDT000173687.1	2016-12-20T16:34:50Z	USA:AL	Raw Intact Chicken	chicken	aadA,aph(3'')-Ib,aph(6)-Id,tet(B)						6 (F)
FSIS1609088	Meleagridis	PDT000173741.1	2016-12-20T17:28:30Z	USA:TX	Comminuted Beef	cattle	aac(2')-IIa,aadA,aph(3'')-Ib,aph(6)-Id,floR,fosA,sul2,tet(A)					5
FSIS1609120	Kentucky	PDT000173658.1	2016-12-20T16:34:45Z	USA:PA	Raw Intact Chicken	chicken	aadA,aph(3'')-Ib,aph(6)-Id,tet(B)						6 (F)
FSIS1609175	Kentucky	PDT000173657.1	2016-12-20T16:34:45Z	USA:GA	Raw Intact Chicken	chicken	aadA,aph(3'')-Ib,aph(6)-Id,tet(B)						6 (F)
FSIS1609225	Dublin	PDT000174262.1	2016-12-23T00:27:07Z	USA:MN	Comminuted Beef	cattle	aadA,aph(3'')-Ib,aph(3')-Ia,aph(6)-Id,blaCMY-2,blaTEM,floR,sul2,tet(A)	1				5
FSIS1609226	Dublin	PDT000174263.1	2016-12-23T00:27:07Z	USA:MN	Comminuted Beef	cattle	aadA,aph(3'')-Ib,aph(6)-Id,floR,sul2,tet(A)	1
FSIS1609227	Dublin	PDT000174268.1	2016-12-23T00:27:09Z	USA:MN	Comminuted Beef	cattle	aadA,aph(3'')-Ib,aph(6)-Id,floR,sul2,tet(A)	1				5
FSIS1609228	Dublin	PDT000173488.1	2016-12-19T20:29:21Z	USA:MN	Comminuted Beef	cattle	aadA,aph(3'')-Ib,aph(6)-Id,floR,sul2,tet(A)	1
FSIS1609229	Dublin	PDT000173481.1	2016-12-19T20:29:20Z	USA:MN	Comminuted Beef	cattle	aadA,aph(3'')-Ib,aph(6)-Id,floR,sul2,tet(A)	1
FSIS1609237	Kentucky	PDT000173496.1	2016-12-19T20:29:22Z	USA:KY	Chicken Carcass	chicken	aadA,aph(3'')-Ib,aph(6)-Id,tet(B)						6
FSIS1609248	Dublin	PDT000174518.1	2016-12-23T20:32:34Z	USA:CA	Comminuted Beef	cattle	aadA,aph(3'')-Ib,aph(3')-Ia,aph(6)-Id,blaTEM,floR,sul2,tet(A)	1				5
FSIS1609256	Kentucky	PDT000174250.1	2016-12-22T23:27:49Z	USA:MS	Raw Intact Chicken	chicken	aadA,aph(3'')-Ib,aph(6)-Id,tet(B)						6
FSIS1609301	Typhimurium	PDT000174253.1	2016-12-22T23:27:49Z	USA:OR	Comminuted Beef	cattle	aadA,aph(3'')-Ib,aph(6)-Id,blaCMY-2,floR,sul2,tet(A)	1			4	5
FSIS1609308	Typhimurium	PDT000174026.1	2016-12-22T18:25:49Z	USA:MD	Chicken Carcass	chicken	aadA,aph(3')-Ia,blaCMY-2,sul2,tet(A)				4
FSIS1609322	Kentucky	PDT000174525.1	2016-12-23T20:32:35Z	USA:VA	Chicken Carcass	chicken	aadA,aph(3'')-Ib,aph(6)-Id,tet(B)						6
FSIS1609338	Newport	PDT000184342.1	2017-02-01T16:32:18Z	USA:WI	Product-Raw-Intact-Beef	cattle	aph(3'')-Ib,aph(6)-Id,blaCMY-2,floR,sul2,tet(A)	1			4	5
FSIS1609345	derby	PDT000177260.1	2017-01-11T18:31:36Z	USA:WI	Product-Raw-Ground, Comminuted or Otherwise Nonintact-Pork	swine	aadA,aph(3')-Ia,fosA,tet(B)						6
FSIS1609435	Ohio	PDT000175534.1	2016-12-28T21:26:50Z	USA:OH	Product-Raw-Intact-Pork	swine	aadA,aph(3'')-Ib,aph(6)-Id,blaCMY,floR,sul2,tet(A)	1
FSIS1609459	Typhimurium	PDT000175477.1	2016-12-27T20:27:31Z	USA:MA	Raw Intact Chicken	chicken	aadA,blaCMY-2,sul2,tet(A)				4
FSIS1609496	Heidelberg	PDT000175483.1	2016-12-27T20:27:32Z	USA:AL	Raw Intact Chicken	chicken	aadA,aph(3'')-Ib,aph(3')-IIa,aph(6)-Ic,aph(6)-Id,ble,fosA,tet(B)			3			6
FSIS1609498	Kentucky	PDT000175482.1	2016-12-27T20:27:31Z	USA:NY	Chicken Carcass	chicken	aadA,aph(3'')-Ib,aph(6)-Id,blaCMY-2,tet(B)				4
FSIS1609504	Typhimurium	PDT000175475.1	2016-12-27T20:27:30Z	USA:GA	Raw Intact Chicken	chicken	aadA,blaCMY-2,sul2,tet(A)				4
FSIS1609509	Typhimurium	PDT000181314.1	2017-01-25T18:35:12Z	USA:DE	Raw Intact Chicken	chicken	aadA,blaCMY-2,sul2,tet(A)				4
FSIS1609615	I 4,[5],12:i:-	PDT000181294.1	2017-01-25T18:35:07Z	USA:MD	Raw Intact Chicken	chicken	aadA,aph(3''),aph(6)-Id,blaCMY-2,sul2,tet(A)				4
FSIS1609668	Typhimurium	PDT000181081.1	2017-01-23T22:30:18Z	USA:VA	Chicken Carcass	chicken	aadA,aph(3')-Ia,blaCMY-2,sul2,tet(A)				4
FSIS1609669	Typhimurium	PDT000181082.1	2017-01-23T22:30:18Z	USA:NC	Raw Intact Chicken	chicken	aadA,blaCMY-2,sul2,tet(A)				4 (I1)
FSIS1609674	Kentucky	PDT000181098.1	2017-01-23T22:30:21Z	USA:GA	Raw Intact Chicken	chicken	aadA,aph(3'')-Ib,aph(6)-Id,tet(B)						6 (F)
FSIS1609702	Infantis	PDT000177792.1	2017-01-13T20:28:21Z	USA:MN	Comminuted Turkey	turkey	aac(3)-VIa,aadA,aadA1,aph(3'')-Ib,aph(3')-Ia,aph(6)-Id,blaCMY-2,blaTEM-1,floR,qacEdelta1,sul1,sul2,tet(A)	1			4	5
FSIS1609762	Agona	PDT000181402.1	2017-01-26T16:30:32Z	USA:IL	Product-Raw-Intact-Pork	swine	aadA,aph(3'')-Ib,aph(6)-Id,blaCMY-2,floR,fosA,sul2,tet(A)	1			4	5
FSIS1609766	Kentucky	PDT000181044.1	2017-01-23T21:32:14Z	USA:MS	Raw Intact Chicken	chicken	aadA,aph(3'')-Ib,aph(6)-Id,tet(B)						6
FSIS1700029	Typhimurium	PDT000201680.1	2017-04-13T20:10:55Z	USA:MD	raw intact chicken	chicken	aph(3')-Ia,blaCMY-2,sul2,tet(A)				4
FSIS1700034	Dublin	PDT000201951.1	2017-04-14T18:50:40Z	USA:CA	product-raw-intact-beef	cattle	aph(3'')-Ib,aph(6)-Id,floR,sul2,tet(A)	1
FSIS1700076	Berta	PDT000201745.1	2017-04-14T03:39:56Z	USA:NC	Animal-Turkey-Turkey Carcass Sponge	turkey	aph(3')-Ia,tet(B)						6 (I1)
FSIS1700078	Kentucky	PDT000201720.1	2017-04-14T02:39:58Z	USA:GA	raw intact chicken	chicken	aph(3'')-Ib,aph(6)-Id,tet(B)						6 (F)
FSIS1700080	I 4,[5],12:i:-	PDT000201718.1	2017-04-14T02:39:57Z	USA:NJ	Comminuted Turkey	turkey	tet(B)						6 (I1)
FSIS1700097	Kentucky	PDT000201640.1	2017-04-13T20:10:48Z	USA:CO	chicken carcass	chicken	aph(3'')-Ib,aph(6)-Id,tet(B)						6 (F)
FSIS1700166	Kentucky	PDT000201819.1	2017-04-14T08:41:38Z	USA:CA	chicken carcass	chicken	aph(3'')-Ib,aph(6)-Id,tet(B)						6
FSIS1700171	Worthington	PDT000201837.1	2017-04-14T09:41:25Z	USA:ID	Product-Raw-Ground, Comminuted or Otherwise Nonintact-Pork	swine	blaCMY-2				4 (I1)
FSIS1700189	Berta	PDT000201941.1	2017-04-14T18:50:39Z	USA:NC	Comminuted Turkey	turkey	aph(3')-Ia,tet(B)						6 (I1)
FSIS1700237	Typhimurium	PDT000201999.1	2017-04-14T18:50:49Z	USA:GA	raw intact chicken	chicken	aph(3')-Ia,blaCMY-2,sul2,tet(A)				4
FSIS1700271	Anatum	PDT000203259.1	2017-04-18T15:42:08Z	USA:IA	Product-Raw-Intact-Pork	swine	aph(3')-Ia,blaCMY-2,tet(C)				4 (I1)
FSIS1700368	Berta	PDT000206470.1	2017-05-02T20:46:42Z	USA:FL	Comminuted Turkey	turkey	aph(3')-Ia,tet(B)						6 (I1)
FSIS1700413	Kentucky	PDT000205701.1	2017-04-28T20:19:16Z	USA:NJ	chicken carcass	chicken	aph(3'')-Ib,aph(6)-Id,blaCMY-2,tet(B)				4
FSIS1700520	Kentucky	PDT000205758.1	2017-04-29T16:13:32Z	USA:GA	raw intact chicken	chicken	aph(3'')-Ib,aph(6)-Id,tet(B)						6 (F)
FSIS1700527	derby	PDT000205736.1	2017-04-28T20:19:22Z	USA:IA	Product-Raw-Intact-Pork	swine	aph(3')-Ia,fosA,tet(B)						6
FSIS1700537	Typhimurium	PDT000206497.1	2017-05-02T20:46:47Z	USA:MD	raw intact chicken	chicken	blaCMY-2,sul2,tet(A)				4
FSIS1700542	Dublin	PDT000206508.1	2017-05-02T20:46:50Z	USA:OH	comminuted beef	cattle	aph(3'')-Ib,aph(6)-Id,bla,blaCMY-2,floR,sul2,tet(A)	1
FSIS1700615	Kentucky	PDT000206459.1	2017-05-02T20:46:41Z	USA:CA	chicken carcass	chicken	aph(3'')-Ib,aph(6)-Id,tet(B)						6 (F)
FSIS1700704	Dublin	PDT000206523.1	2017-05-02T20:46:52Z	USA:UT	comminuted beef	cattle	aph(3'')-Ib,aph(6)-Id,floR,sul2,tet(A)	1				5
FSIS1700713	Reading	PDT000212943.1	2017-05-24T22:42:05Z	USA:IA	Animal-Turkey-Turkey Carcass Sponge	turkey	aph(3'')-Ib,aph(6)-Id,sul2,tet(A)	1
FSIS1700717	Heidelberg	PDT000212945.1	2017-05-24T22:42:06Z	USA:GA	raw intact chicken	chicken	aph(3'')-Ib,aph(3')-IIa,aph(6)-Ic,aph(6)-Id,ble,fosA,tet(B)			3			6
FSIS1700730	Typhimurium	PDT000209407.1	2017-05-18T21:51:28Z	USA:TX	Product-Raw-Intact-Pork	swine	aph(3'')-Ib,aph(6)-Id,blaCMY-2,floR,qnrB19,sul2,tet(A)				4
FSIS1701002	Kentucky	PDT000217331.1	2017-06-09T17:23:13Z	USA:MS	raw intact chicken	chicken	aph(3'')-Ib,aph(6)-Id,tet(B)						6 (I1)
FSIS1701007	Kentucky	PDT000211072.1	2017-05-22T21:40:20Z	USA:NY	raw intact chicken	chicken	aph(3'')-Ib,aph(6)-Id,blaCMY-2,tet(B)				4
FSIS1701024	Typhimurium	PDT000211067.1	2017-05-22T21:40:19Z	USA:CA	comminuted beef	cattle	aph(3'')-Ib,aph(6)-Id,blaCMY-2,floR,sul2,tet(A)	1
FSIS1701026	Dublin	PDT000211065.1	2017-05-22T21:40:19Z	USA:AZ	comminuted beef	cattle	ant(2'')-Ia,aph(3''),aph(6)-Id,blaCMY-2,blaTEM-1,cmlA5,floR,qacEdelta1,sul2,tet(A)				4
FSIS1701029	Kentucky	PDT000211066.1	2017-05-22T21:40:19Z	USA:AL	raw intact chicken	chicken	aph(3'')-Ib,aph(6)-Id,tet(B)						6 (F)
FSIS1701030	Kentucky	PDT000212551.1	2017-05-23T22:39:29Z	USA:NY	raw intact chicken	chicken	aph(3'')-Ib,aph(6)-Id,tet(B)						6 (F)
FSIS1701114	Agona	PDT000211318.1	2017-05-22T22:40:39Z	USA:IL	Product-Raw-Intact-Pork	swine	aac(3)-VIa,aadA6,aph(3'')-Ib,aph(3')-Ia,aph(6)-Id,blaCMY-2,blaTEM,floR,fosA,qacEdelta1,qnrB19,rmtE1,sul1,sul2,tet(A)	1			4
FSIS1701125	Kentucky	PDT000213309.1	2017-05-26T21:41:12Z	USA:MS	comminuted chicken	chicken	aph(3'')-Ib,aph(6)-Id,tet(B)						6
FSIS1701126	Berta	PDT000213301.1	2017-05-26T20:38:30Z	USA:NC	Comminuted Turkey	turkey	tet(B)						6 (F)
FSIS1701152	Dublin	PDT000211331.1	2017-05-22T22:40:41Z	USA:WI	product-raw-intact-beef	cattle	aph(3'')-Ib,aph(6)-Id,blaCMY,blaTEM,floR,sul2,tet(A)	1				5
FSIS1701153	Dublin	PDT000209433.1	2017-05-18T21:51:35Z	USA:NY	product-raw-intact-beef	cattle	aph(3'')-Ib,aph(6)-Id,blaCMY-2,floR,sul2,tet(A)	1				5
FSIS1701200	Kentucky	PDT000209432.1	2017-05-18T21:51:35Z	USA:IN	raw intact chicken	chicken	aph(3'')-Ib,aph(6)-Id,tet(B)						6 (F)
FSIS1701205	Kentucky	PDT000212855.1	2017-05-24T16:43:19Z	USA:CA	raw intact chicken	chicken	aph(3'')-Ib,aph(6)-Id,tet(B)						6
FSIS1701304	Kentucky	PDT000215927.1	2017-06-05T23:23:17Z	USA:ME	comminuted chicken	chicken	aph(3'')-Ib,aph(6)-Id,tet(B)						6 (F)
FSIS1701316	Albany	PDT000217319.1	2017-06-09T17:23:10Z	USA:IN	Comminuted Turkey	turkey	aac(6')-Ib4,aadA1,tet(B)						6
FSIS1701378	Kentucky	PDT000217294.1	2017-06-09T17:23:05Z	USA:CA	raw intact chicken	chicken	aph(3'')-Ib,aph(6)-Id,tet(B)						6 (F)
FSIS1701397	Kentucky	PDT000217302.1	2017-06-09T17:23:07Z	USA:MN	chicken carcass	chicken	aph(3'')-Ib,aph(6)-Id,tet(B)						6 (F)
FSIS1701407	Typhimurium	PDT000225333.1	2017-07-15T01:37:27Z	USA:MD	chicken carcass	chicken	blaCMY-2,sul2,tet(A)				4
FSIS1701412	Dublin	PDT000225324.1	2017-07-15T01:37:25Z	USA:WI	product-raw-intact-beef	cattle	aph(3'')-Ib,aph(3')-Ia,aph(6)-Id,blaCMY-2,blaTEM,floR,sul2,tet(A)	1
FSIS1701449	Typhimurium	PDT000213885.1	2017-05-31T17:41:43Z	USA:VA	raw intact chicken	chicken	blaCMY-2,sul2,tet(A)				4 (I1)
FSIS1701456	Kentucky	PDT000213895.1	2017-05-31T18:40:27Z	USA:GA	chicken carcass	chicken	aph(3'')-Ib,aph(6)-Id,blaCMY-2,tet(B)				4
FSIS1701534	Typhimurium	PDT000215831.1	2017-06-05T23:23:00Z	USA:VA	chicken carcass	chicken	blaCMY-2,sul2,tet(A)				4
FSIS1701535	Typhimurium	PDT000215888.1	2017-06-05T23:23:10Z	USA:MD	chicken carcass	chicken	blaCMY-2,sul2,tet(A)				4
FSIS1701550	Kentucky	PDT000215139.1	2017-06-02T23:16:11Z	USA:AL	chicken carcass	chicken	aph(3'')-Ib,aph(6)-Id,tet(B)						6 (F)
FSIS1701563	Dublin	PDT000217333.1	2017-06-09T17:23:13Z	USA:AZ	comminuted beef	cattle	aph(3'')-Ib,aph(3')-Ia,aph(6)-Id,blaCMY-2,floR,sul2,tet(A)	1				5
FSIS1701622	Typhimurium	PDT000218679.1	2017-06-15T01:10:00Z	USA:VA	chicken carcass	chicken	blaCMY-2				4
FSIS1701632	I 4,[5],12:i:-	PDT000218674.1	2017-06-15T01:09:58Z	USA:IA	Product-Raw-Intact-Pork	swine	aac(3)-IIa,aph(3')-Ia,blaCMY-2,blaCTX-M-55,qnrB19,tet(B)				4
FSIS1701669	Kentucky	PDT000217317.1	2017-06-09T17:23:10Z	USA:LA	raw intact chicken	chicken	blaCMY-2				4 (I1)
FSIS1701673	Kentucky	PDT000217323.1	2017-06-09T17:23:11Z	USA:TX	chicken carcass	chicken	aph(3'')-Ib,aph(6)-Id,tet(B)						6 (F)
FSIS1701684	Kentucky	PDT000218612.1	2017-06-15T01:09:42Z	USA:MS	comminuted chicken	chicken	aph(3'')-Ib,aph(6)-Id,tet(B)						6 (F)
FSIS1701754	derby	PDT000265178.1	2017-11-17T22:34:38Z	USA:NJ	Product-Raw-Ground, Comminuted or Otherwise Nonintact-Pork	swine	aph(3'')-Ib,aph(6)-Id,floR,fosA7,sul2,tet(A)	1				5
FSIS1701805	Dublin	PDT000218461.1	2017-06-14T08:22:53Z	USA:OH	product-raw-intact-beef	cattle	aph(3'')-Ib,aph(6)-Id,blaCMY-2,floR,sul2,tet(A)	1				5
FSIS1701818	Reading	PDT000218703.1	2017-06-15T05:57:19Z	USA:MN	Animal-Turkey-Turkey Carcass Sponge	turkey	aph(3'')-Ib,aph(6)-Id,sul2,tet(A)	1 (Q1)
FSIS1701825	Typhimurium	PDT000218698.1	2017-06-15T05:57:18Z	USA:VA	chicken carcass	chicken	aph(3')-Ia,blaCMY-2,sul2,tet(A)				4
FSIS1701973	Infantis	PDT000225948.1	2017-07-20T20:37:55Z	USA:IA	Product-Raw-Intact-Pork	swine	aac(3)-IV,aadA2,aph(3'')-Ib,aph(6)-Id,blaCMY-2,floR,qacEdelta1,sul1,sul2,tet(A)	1			4	5
FSIS1702003	Typhimurium	PDT000218878.1	2017-06-16T19:06:21Z	USA:VA	raw intact chicken	chicken	aph(3')-Ia,blaCMY-2,sul2,tet(A)				4
FSIS1702015	Typhimurium	PDT000222679.1	2017-07-05T16:47:11Z	USA:MN	comminuted chicken	chicken	blaCMY-2,sul2,tet(A)				4
FSIS1702020	Agona	PDT000222687.1	2017-07-05T16:47:12Z	USA:WI	Product-Raw-Ground, Comminuted or Otherwise Nonintact-Pork	swine	aac(3)-VIa,aph(3'')-Ib,aph(3')-Ia,aph(6)-Id,blaCMY-2,floR,fosA7,qacEdelta1,qnrB19,rmtE1,sul1,sul2,tet(A),tet(M)				4
FSIS1702115	Kentucky	PDT000221635.1	2017-06-29T01:02:04Z	USA:MS	raw intact chicken	chicken	aph(3'')-Ib,aph(6)-Id,tet(B)						6 (F)
FSIS1702159	Typhimurium	PDT000220785.1	2017-06-26T20:50:56Z	USA:CT	raw intact chicken	chicken	blaCMY-2,sul2,tet(A)				4
FSIS1702168	Reading	PDT000221639.1	2017-06-29T05:46:17Z	USA:MN	Comminuted Turkey	turkey	aph(3'')-Ib,aph(6)-Id,sul2,tet(A)	1 (Q1)
FSIS1702171	Newport	PDT000221486.1	2017-06-28T00:26:02Z	USA:ND	comminuted beef	cattle	aph(3'')-Ib,aph(6)-Id,blaCMY-2,floR,sul2,tet(A)	1			4
FSIS1702231	Kentucky	PDT000221484.1	2017-06-28T00:26:01Z	USA:LA	raw intact chicken	chicken	aph(3'')-Ib,aph(6)-Id,tet(B)						6 (F)
FSIS1702232	Heidelberg	PDT000221489.1	2017-06-28T00:26:03Z	USA:AL	raw intact chicken	chicken	aac(3)-VIa,aadA1,aph(3'')-Ib,aph(3')-IIa,aph(6)-Ic,aph(6)-Id,ble,fosA7,qacEdelta1,sul1,tet(B)			3			6 (HI2)
FSIS1702235	Kentucky	PDT000221477.1	2017-06-28T00:26:00Z	USA:NC	raw intact chicken	chicken	aph(3'')-Ib,aph(6)-Id,tet(B)						6 (F)
FSIS1702236	Kentucky	PDT000221464.1	2017-06-27T22:22:59Z	USA:CA	raw intact chicken	chicken	aph(3'')-Ib,aph(6)-Id,tet(B)						6 (F)
FSIS1702293	Litchfield	PDT000224688.1	2017-07-12T16:39:32Z	USA:VA	Comminuted Turkey	turkey	blaCMY-2				4 (I1)
FSIS1702302	Reading	PDT000221662.1	2017-06-29T05:46:22Z	USA:TX	Product-Raw-Ground, Comminuted or Otherwise Nonintact-Pork	swine	aph(3'')-Ib,aph(3')-Ia,aph(6)-Id,blaTEM-1,sul2,tet(A)	1 (Q1)
FSIS1702313	Heidelberg	PDT000222879.1	2017-07-06T18:39:44Z	USA:WI	Comminuted Turkey	turkey	aph(3'')-Ib,aph(3')-Ia,aph(6)-Id,blaCMY-2,fosA7,sul2,tet(A)	1			4
FSIS1702462	Typhimurium	PDT000224694.1	2017-07-12T16:39:32Z	USA:VA	raw intact chicken	chicken	blaCMY-2,sul2,tet(A)				4
FSIS1702467	Dublin	PDT000224695.1	2017-07-12T16:39:33Z	USA:WI	product-raw-intact-beef	cattle	aph(3'')-Ib,aph(6)-Id,blaCMY-2,floR,sul2,tet(A)	1				5
FSIS1702531	Kentucky	PDT000223003.1	2017-07-06T21:39:45Z	USA:MS	raw intact chicken	chicken	aph(3'')-Ib,aph(6)-Id,tet(B)						6 (F)
FSIS1702665	Newport	PDT000225931.1	2017-07-20T14:37:38Z	USA:TX	comminuted beef	cattle	aph(3'')-Ib,aph(6)-Id,blaCMY-2,floR,sul2,tet(A)	1			4
FSIS1702666	Newport	PDT000225921.1	2017-07-20T14:37:37Z	USA:TX	comminuted beef	cattle	aph(3'')-Ib,aph(6)-Id,blaCMY-2,floR,sul2,tet(A)	1			4
FSIS1702667	Newport	PDT000225920.1	2017-07-20T14:37:37Z	USA:MN	comminuted beef	cattle	aph(3'')-Ib,aph(6)-Id,blaCMY-2,floR,sul2,tet(A)	1			4
FSIS1702669	Newport	PDT000225910.1	2017-07-20T13:39:00Z	USA:MN	comminuted beef	cattle	aph(3'')-Ib,aph(6)-Id,blaCMY-2,floR,sul2,tet(A)	1			4	5
FSIS1702674	Newport	PDT000224638.1	2017-07-12T15:40:41Z	USA:TX	comminuted beef	cattle	aph(3'')-Ib,aph(6)-Id,blaCMY-2,floR,sul2,tet(A)	1			4	5
FSIS1702675	Newport	PDT000224641.1	2017-07-12T15:40:42Z	USA:CA	comminuted beef	cattle	aph(3'')-Ib,aph(6)-Id,blaCMY-2,floR,sul2,tet(A)	1			4	5
FSIS1702676	Newport	PDT000224627.1	2017-07-12T15:40:40Z	USA:CA	comminuted beef	cattle	aph(3'')-Ib,aph(6)-Id,blaCMY-2,floR,sul2,tet(A)	1			4
FSIS1702699	Kentucky	PDT000226170.1	2017-07-22T19:39:00Z	USA:IL	chicken carcass	chicken	blaCMY-2				4
FSIS1702757	Dublin	PDT000227687.1	2017-07-27T19:38:28Z	USA:MN	comminuted beef	cattle	aph(3'')-Ib,aph(6)-Id,blaCMY-2,floR,sul2,tet(A)	1			4
FSIS1702771	Agona	PDT000225562.1	2017-07-19T00:01:02Z	USA:WI	Product-Raw-Ground, Comminuted or Otherwise Nonintact-Pork	swine	aph(3'')-Ib,aph(6)-Id,blaCMY-2,floR,fosA7,sul2,tet(A)	1			4	5
FSIS1702830	Typhimurium	PDT000226163.1	2017-07-22T19:38:59Z	USA:IL	raw intact chicken	chicken	blaCMY-2,sul2,tet(A)				4
FSIS1702836	Kentucky	PDT000225598.1	2017-07-19T16:38:13Z	USA:AL	chicken carcass	chicken	aph(3'')-Ib,aph(6)-Id,tet(B)						6 (F)
FSIS1702854	derby	PDT000226511.1	2017-07-24T20:39:17Z	USA:WI	Product-Raw-Ground, Comminuted or Otherwise Nonintact-Pork	swine	aph(3')-Ia,fosA7,tet(B)						6
FSIS1702977	Kentucky	PDT000227069.1	2017-07-25T15:43:02Z	USA:AL	raw intact chicken	chicken	blaCMY-2				4 (I1)
FSIS1703000	Newport	PDT000232179.1	2017-08-08T19:07:59Z	USA:TX	product-raw-intact-beef	cattle	aph(3'')-Ib,aph(6)-Id,blaCMY-2,floR,sul2,tet(A)	1			4
FSIS1703010	Johannesburg	PDT000227376.1	2017-07-26T17:40:56Z	USA:IL	Product-Raw-Intact-Pork	swine	aadA7,bleO,qacEdelta1,qnrB19,sul1,tet(B)						6
FSIS1703033	Kentucky	PDT000227374.1	2017-07-26T17:40:56Z	USA:LA	chicken carcass	chicken	aph(3'')-Ib,aph(6)-Id,tet(B)						6 (F)
FSIS1703108	Reading	PDT000229828.1	2017-07-31T03:07:43Z	USA:NY	Comminuted Turkey	turkey	aph(3'')-Ib,aph(6)-Id,blaTEM-1,sul2,tet(A)	1 (Q1)
FSIS1703116	Newport	PDT000228429.1	2017-07-28T22:56:09Z	USA:WI	product-raw-intact-beef	cattle	aph(3'')-Ib,aph(6)-Id,blaCMY-2,floR,sul2,tet(A)	1			4
FSIS1703129	Agona	PDT000229837.1	2017-07-31T03:07:45Z	USA:MI	Product-Raw-Ground, Comminuted or Otherwise Nonintact-Pork	swine	aac(3)-IV,ant(2'')-Ia,aph(3'')-Ib,aph(3')-Ia,aph(4)-Ia,aph(6)-Id,blaCMY-2,blaTEM-1,bleO,floR,fosA7,sul2,sul3,tet(A)	1				5
FSIS1703136	Kentucky	PDT000229830.1	2017-07-31T03:07:43Z	USA:NY	raw intact chicken	chicken	aph(3'')-Ib,aph(6)-Id,tet(B)						6
FSIS1703141	Anatum	PDT000229846.1	2017-07-31T03:07:46Z	USA:IL	product-raw-intact-beef	cattle	tet(B)						6 (I1)
FSIS1703201	Kentucky	PDT000229853.1	2017-07-31T03:07:48Z	USA:OH	raw intact chicken	chicken	aph(3'')-Ib,aph(6)-Id,blaCMY-2,tet(B)				4
FSIS1703226	Kentucky	PDT000235412.1	2017-08-23T03:24:52Z	USA:MS	raw intact chicken	chicken	aph(3'')-Ib,aph(6)-Id,tet(B)						6 (F)
FSIS1703280	Kentucky	PDT000230534.1	2017-08-02T18:39:38Z	USA:SC	chicken carcass	chicken	aph(3'')-Ib,aph(6)-Id,tet(B)						6 (F)
FSIS1703281	Kentucky	PDT000230533.1	2017-08-02T18:39:38Z	USA:IA	chicken carcass	chicken	aph(3'')-Ib,aph(6)-Id,tet(B)						6 (F)
FSIS1703282	Kentucky	PDT000230532.1	2017-08-02T18:39:38Z	USA:TX	raw intact chicken	chicken	aph(3'')-Ib,aph(6)-Id,tet(B)						6 (F)
FSIS1703283	Kentucky	PDT000230581.1	2017-08-02T18:39:48Z	USA:MS	chicken carcass	chicken	aph(3'')-Ib,aph(6)-Id,tet(B)						6 (F)
FSIS1703298	Kentucky	PDT000230580.1	2017-08-02T18:39:48Z	USA:MS	chicken carcass	chicken	aph(3'')-Ib,aph(6)-Id,tet(B)						6 (F)
FSIS1703299	Kentucky	PDT000230576.1	2017-08-02T18:39:47Z	USA:ME	chicken carcass	chicken	aph(3'')-Ib,aph(6)-Id,tet(B)						6 (F)
FSIS1703303	Kentucky	PDT000230526.1	2017-08-02T18:39:37Z	USA:OH	comminuted chicken	chicken	aph(3'')-Ib,aph(6)-Id,tet(B)						6 (F)
FSIS1703314	Muenster	PDT000231506.1	2017-08-07T18:40:41Z	USA:TX	product-raw-intact-beef	cattle	aadA2,aph(3'')-Ib,aph(6)-Id,dfrA12,floR,qacEdelta1,qnrB19,sul1,sul2,tet(A)					5
FSIS1703337	Dublin	PDT000231489.1	2017-08-07T18:40:38Z	USA:WI	product-raw-intact-beef	cattle	aph(3'')-Ib,aph(6)-Id,blaCMY-2,blaTEM,floR,sul2,tet(A)	1				5
FSIS1703350	Newport	PDT000235528.1	2017-08-23T03:25:08Z	USA:OH	comminuted beef	cattle	aph(3'')-Ib,aph(6)-Id,blaCMY-2,floR,sul2,tet(A)	1			4	5
FSIS1703461	Dublin	PDT000232232.1	2017-08-09T01:42:04Z	USA:OR	comminuted beef	cattle	aph(3'')-Ib,aph(3')-Ia,aph(6)-Id,blaCMY-2,blaTEM,floR,sul2,tet(A)	1				5
FSIS1703471	Cerro	PDT000232222.1	2017-08-09T01:42:02Z	USA:VA	comminuted beef	cattle	tet(B)						6 (I1)
FSIS1703483	Montevideo	PDT000232618.1	2017-08-10T00:15:03Z	USA:KS	product-raw-intact-beef	cattle	tet(A),tet(B)						6 (I1)
FSIS1703499	Kentucky	PDT000232623.1	2017-08-10T00:15:04Z	USA:NY	raw intact chicken	chicken	aph(3'')-Ib,aph(6)-Id,blaCMY-2,tet(B)				4
FSIS1703503	Kentucky	PDT000232612.1	2017-08-10T00:15:02Z	USA:CA	raw intact chicken	chicken	aph(3'')-Ib,aph(6)-Id,tet(B)						6 (F)
FSIS1703658	Anatum	PDT000235409.1	2017-08-23T03:24:51Z	USA:CA	comminuted beef	cattle	tet(B)						6 (I1)
FSIS1703663	Schwarzengrund	PDT000240063.1	2017-09-11T18:35:46Z	USA:OK	NRTE (Not-Ready-to-Eat) Comminuted Poultry Exploratory Sampling - Chickens	chicken	aac(3)-IId,aadA2,aph(3'')-Ib,aph(6)-I,blaTEM-1,dfrA12,mph(A),qacEdelta1,sul1,sul2,tet(B)		2
FSIS1703664	Schwarzengrund	PDT000234393.1	2017-08-19T00:19:55Z	USA:GA	raw intact chicken	chicken	aac(3)-IId,aadA2,aph(3'')-Ib,aph(6)-I,blaTEM-1,dfrA12,mph(A),qacEdelta1,sul1,sul2,tet(B)		2
FSIS1703704	Typhimurium	PDT000236962.1	2017-08-27T17:36:41Z	USA:MD	chicken carcass	chicken	blaCMY-2,sul2,tet(A)				4
FSIS1703706	Kentucky	PDT000236964.1	2017-08-27T17:36:41Z	USA:WA	raw intact chicken	chicken	aph(3'')-Ib,aph(6)-Id,blaCMY-2,tet(B)				4		6 (F)
FSIS1703715	Reading	PDT000236579.1	2017-08-26T20:39:08Z	USA:MN	Comminuted Turkey	turkey	aph(3'')-Ib,aph(6)-Id,blaTEM-1,sul2,tet(A)	1 (Q1)
FSIS1703840	Typhimurium	PDT000236971.1	2017-08-27T18:37:25Z	USA:SC	raw intact chicken	chicken	blaCMY-2,sul2,tet(A)				4
FSIS1703851	Kentucky	PDT000236979.1	2017-08-27T18:37:26Z	USA:WA	raw intact chicken	chicken	aph(3'')-Ib,aph(6)-Id,blaCMY-2,tet(B)				4
FSIS1709815	Liverpool	PDT000181060.1	2017-01-23T21:32:17Z	USA:MN	Comminuted Turkey	turkey	aadA,blaCMY-2				4 (I1)
FSIS1709816	Dublin	PDT000181061.1	2017-01-23T21:32:17Z	USA:WI	Product-Raw-Intact-Beef	cattle	aadA,aph(3'')-Ib,aph(6)-Id,blaCMY-2,floR,sul2,tet(A)	1				5
FSIS1709877	Kentucky	PDT000184612.1	2017-02-02T19:34:05Z	USA:NC	Chicken Carcass	chicken	aph(3'')-Ib,aph(6)-Id,blaCMY-2				4 (I1)
FSIS1709926	Heidelberg	PDT000184945.1	2017-02-04T23:32:36Z	USA:AL	Raw Intact Chicken	chicken	aph(3'')-Ib,aph(3')-IIa,aph(6)-Ic,aph(6)-Id,blaCMY-2,ble,fosA,tet(B)			3			6
FSIS1709927	Kentucky	PDT000184955.1	2017-02-04T23:32:39Z	USA:TX	Raw Intact Chicken	chicken	aph(3'')-Ib,aph(6)-Id,sul2,tet(B)						6 (F)
FSIS1709935	I 4,[5],12:i:-	PDT000184922.1	2017-02-04T23:32:31Z	USA:NY	Product-Raw-Intact-Beef	cattle	blaCMY-2				4 (I1)
FSIS1709937	Heidelberg	PDT000184929.1	2017-02-04T23:32:33Z	USA:AL	Raw Intact Chicken	chicken	aph(3'')-Ib,aph(3')-IIa,aph(6)-Ic,aph(6)-Id,ble,fosA,tet(B)			3			6
FSIS1710008	Heidelberg	PDT000185754.1	2017-02-07T18:41:09Z	USA:NY	Raw Intact Chicken	chicken	blaCMY-2,fosA				4 (I1)
FSIS1710009	Kentucky	PDT000185733.1	2017-02-07T18:41:03Z	USA:IL	Raw Intact Chicken	chicken	aph(3'')-Ib,aph(6)-Id,tet(B)						6 (F)
FSIS1710010	Dublin	PDT000185725.1	2017-02-07T18:41:01Z	USA:MN	Comminuted Beef	cattle	aph(3'')-Ib,aph(6)-Id,blaCMY-2,floR,sul2,tet(A)	1			4	5
FSIS1710011	Dublin	PDT000184599.1	2017-02-02T17:32:31Z	USA:MN	Comminuted Beef	cattle	aph(3'')-Ib,aph(6)-Id,blaCMY-2,floR,sul2,tet(A)				4	5
FSIS1710069	Kentucky	PDT000184591.1	2017-02-02T17:32:29Z	USA:NY	Raw Intact Chicken	chicken	aph(3'')-Ib,aph(6)-Id,blaCMY-2,tet(B)				4
FSIS1710071	Kentucky	PDT000187679.1	2017-02-14T17:40:57Z	USA:NY	Raw Intact Chicken	chicken	aph(3'')-Ib,aph(6)-Id,blaCMY-2,tet(B)				4
FSIS1710074	Kentucky	PDT000187600.1	2017-02-14T17:40:45Z	USA:NJ	Chicken Carcass	chicken	aac(3)-VIa,aadA1,aph(3'')-Ib,aph(6)-Id,qacEdelta1,sul1,tet(B)						6 (F)
FSIS1710124	Kentucky	PDT000184596.1	2017-02-02T17:32:30Z	USA:NY	Raw Intact Chicken	chicken	aph(3'')-Ib,aph(6)-Id,blaCMY-2				4
FSIS1710129	muenchen	PDT000184319.1	2017-02-01T16:32:15Z	USA:MO	Product-Raw-Ground, Comminuted or Otherwise Nonintact-Pork	swine	aph(3'')-Ib,aph(6)-Id,sul2,tet(A)	1 (Q1)
FSIS1710165	Kentucky	PDT000184923.1	2017-02-04T23:32:31Z	USA:LA	Chicken Carcass	chicken	aph(3'')-Ib,aph(6)-Id,tet(B)						6 (F)
FSIS1710172	Kentucky	PDT000189019.1	2017-02-21T22:43:53Z	USA:GA	Comminuted Chicken	chicken	aph(3'')-Ib,aph(6)-Id,tet(B)						6 (F)
FSIS1710175	Heidelberg	PDT000187580.1	2017-02-14T17:40:41Z	USA:AL	Raw Intact Chicken	chicken	aph(3'')-Ib,aph(3')-IIa,aph(6)-Ic,aph(6)-Id,ble,fosA,tet(B)			3 (HI2)			6
FSIS1710181	Typhimurium	PDT000187603.1	2017-02-14T17:40:45Z	USA:TX	Comminuted Beef	cattle	aph(3'')-Ib,aph(6)-Id,blaCMY-2,floR,qnrB19,sul2,tet(A)	1			4	5
FSIS1710244	derby	PDT000187620.1	2017-02-14T17:40:48Z	USA:OH	Product-Raw-Ground, Comminuted or Otherwise Nonintact-Pork	swine	aadA2,blaCMY-2,fosA,qacEdelta1,sul1,tet(A)				4 (I1)
FSIS1710308	Kentucky	PDT000185751.1	2017-02-07T18:41:08Z	USA:LA	Chicken Carcass	chicken	aph(3'')-Ib,aph(6)-Id,tet(B)						6 (F)
FSIS1710313	Infantis	PDT000184912.1	2017-02-03T23:32:19Z	USA:WA	Raw Intact Chicken	chicken	aac(3)-II,aph(3'')-Ib,aph(6)-Id,blaCMY-2,blaTEM-1,floR,sul2,tet(A)	1			4	5
FSIS1710392	Kentucky	PDT000187806.1	2017-02-14T21:36:29Z	USA:GA	Comminuted Chicken	chicken	aph(3'')-Ib,aph(6)-Id,blaCMY-2,tet(B)				4		6
FSIS1710398	Kentucky	PDT000193560.1	2017-03-16T18:39:14Z	USA:MS	Chicken Carcass	chicken	aph(3'')-Ib,aph(6)-Id,tet(B)						6
FSIS1710399	Typhimurium	PDT000193534.1	2017-03-16T17:41:00Z	USA:UT	Comminuted Beef	cattle	aph(3'')-Ib,aph(6)-Id,blaCMY-2,floR,sul2,tet(A)				4	5
FSIS1710439	London	PDT000189068.1	2017-02-22T17:40:45Z	USA:NC	Product-Raw-Ground, Comminuted or Otherwise Nonintact-Pork	swine	tet(B)						6 (I1)
FSIS1710440	Kentucky	PDT000189092.1	2017-02-22T17:40:48Z	USA:MS	Chicken Carcass	chicken	aph(3'')-Ib,aph(6)-Id,tet(B)						6
FSIS1710447	Newport	PDT000190714.1	2017-03-01T15:20:46Z	USA:PA	Product-Raw-Intact-Beef	cattle	aph(3'')-Ib,aph(6)-Id,blaCMY-2,floR,sul2,tet(A)	1			4
FSIS1710511	Kentucky	PDT000187920.1	2017-02-15T23:41:22Z	USA:OH	Chicken Carcass	chicken	aph(3'')-Ib,aph(6)-Id,blaCMY-2,tet(B)				4 (I1)		6 (F)
FSIS1710512	Kentucky	PDT000187915.1	2017-02-15T22:41:01Z	USA:GA	Comminuted Chicken	chicken	blaCMY				4
FSIS1710575	Berta	PDT000193512.1	2017-03-16T16:39:27Z	USA:NC	Comminuted Turkey	turkey	aph(3')-Ia,tet(B)						6 (I1)
FSIS1710583	derby	PDT000190928.1	2017-03-03T19:41:57Z	USA:TN	Product-Raw-Ground, Comminuted or Otherwise Nonintact-Pork	swine	fosA,tet(B)						6
FSIS1710592	derby	PDT000190925.1	2017-03-03T19:41:56Z	USA:OH	Product-Raw-Intact-Pork	swine	fosA,tet(B)						6
FSIS1710596	Dublin	PDT000190926.1	2017-03-03T19:41:57Z	USA:MN	Comminuted Beef	cattle	aph(3'')-Ib,aph(6)-Id,blaCMY-2,floR,sul2,tet(A)	1				5
FSIS1710628	Typhimurium	PDT000190919.1	2017-03-03T19:41:56Z	USA:MD	Raw Intact Chicken	chicken	blaCMY-2,sul2,tet(A)				4
FSIS1710631	Kentucky	PDT000193662.1	2017-03-17T16:39:04Z	USA:CA	Raw Intact Chicken	chicken	aph(3'')-Ib,aph(6)-Id,tet(B)						6 (F)
FSIS1710658	Typhimurium	PDT000203314.1	2017-04-18T19:12:40Z	USA:UT	product-raw-intact-beef	cattle	aph(3'')-Ib,aph(6)-Id,blaCMY-2,floR,sul2,tet(A)	1			4
FSIS1710677	4,[5],12:r:-	PDT000201849.1	2017-04-14T09:41:28Z	USA:MN	Animal-Turkey-Turkey Carcass Sponge	turkey	fosA,tet(B)						6 (I1)
FSIS1710678	Mbandaka	PDT000201832.1	2017-04-14T09:41:25Z	USA:CA	Product-Raw-Intact-Pork	swine	aac(3)-IV,aadA2,dfrA12,qacEdelta1,sul1,tet(B)						6
FSIS1710681	Dublin	PDT000193605.1	2017-03-16T19:38:11Z	USA:KS	Comminuted Beef	cattle	aph(3'')-Ib,aph(6)-Id,blaCMY,floR,sul2,tet(A)	1				5
FSIS1710686	Dublin	PDT000188453.1	2017-02-18T18:38:23Z	USA:TX	Comminuted Beef	cattle	aph(3'')-Ib,aph(6)-Id,blaCMY-2,floR,sul2,tet(A)	1
FSIS1710687	Dublin	PDT000188404.1	2017-02-18T17:37:54Z	USA:TX	Comminuted Beef	cattle	aph(3'')-Ib,aph(6)-Id,blaCMY-2,floR,sul2,tet(A)	1				5
FSIS1710688	Dublin	PDT000188424.1	2017-02-18T17:38:00Z	USA:CA	Comminuted Beef	cattle	aph(3''),aph(6)-Id,bla,blaCMY-2,cmlA5,floR,qacEdelta1,sul2,tet(A)	1			4
FSIS1710747	Kentucky	PDT000201834.1	2017-04-14T09:41:25Z	USA:IL	chicken carcass	chicken	blaCMY-2				4
FSIS1710772	Newport	PDT000193180.1	2017-03-15T17:39:46Z	USA:WI	Comminuted Beef	cattle	aph(3'')-Ib,aph(6)-Id,blaCMY-2,floR,sul2,tet(A)	1			4
FSIS1710787	I 4,[5],12:i:-	PDT000193367.1	2017-03-15T21:41:01Z	USA:MN	Comminuted Turkey	turkey	aac(3)-IV,aph(3'')-Ib,aph(4)-Ia,aph(6)-Id,blaCMY-2,tet(B)				4 (I1)
FSIS1710792	Kentucky	PDT000197582.1	2017-03-25T16:36:57Z	USA:LA	Chicken Carcass	chicken	aph(3'')-Ib,aph(6)-Id,tet(B)						6 (F)
FSIS1710802	Kentucky	PDT000193665.1	2017-03-17T16:39:05Z	USA:WA	Raw Intact Chicken	chicken	aph(3'')-Ib,aph(6)-Id,blaCMY-2,qnrB19,tet(B)				4
FSIS1710811	Typhimurium	PDT000192827.1	2017-03-14T09:41:34Z	USA:MI	Comminuted Chicken	chicken	blaCMY-2,sul2,tet(A)				4 (I1)
FSIS1710812	Typhimurium	PDT000192825.1	2017-03-14T09:41:34Z	USA:MA	Raw Intact Chicken	chicken	blaCMY-2,sul2,tet(A)				4
FSIS1710877	Typhimurium	PDT000197580.1	2017-03-25T16:36:56Z	USA:MI	Comminuted Chicken	chicken	blaCMY-2,sul2,tet(A)				4 (I1)
FSIS1710925	Kentucky	PDT000195801.1	2017-03-21T22:35:55Z	USA:MS	Raw Intact Chicken	chicken	aph(3'')-Ib,aph(6)-Id,tet(B)						6
FSIS1710928	Typhimurium	PDT000195795.1	2017-03-21T22:35:54Z	USA:MD	Chicken Carcass	chicken	blaCMY-2,sul2,tet(A)				4
FSIS1710929	Kentucky	PDT000195797.1	2017-03-21T22:35:54Z	USA:IA	Chicken Carcass	chicken	aph(3'')-Ib,aph(6)-Id,tet(B)						6
FSIS1710933	Heidelberg	PDT000195784.1	2017-03-21T22:35:51Z	USA:OK	Raw Intact Chicken	chicken	aph(3'')-Ib,aph(3')-IIa,aph(6)-Ic,aph(6)-Id,blaCMY-2,ble,fosA,tet(B)			3			6
FSIS1710956	Infantis	PDT000195816.1	2017-03-21T23:36:16Z	USA:NE	Product-Raw-Intact-Pork	swine	blaCMY				4 (I1)
FSIS1710957	Dublin	PDT000195823.1	2017-03-21T23:36:17Z	USA:ID	Comminuted Beef	cattle	aph(3'')-Ib,aph(6)-Id,blaCMY-2,floR,sul2,tet(A)	1
FSIS1710985	Typhimurium	PDT000205035.1	2017-04-24T20:40:54Z	USA:UT	product-raw-intact-beef	cattle	aph(3'')-Ib,aph(6)-Id,blaCMY-2,floR,sul2,tet(A)	1			4	5
FSIS21720014	Kentucky	PDT000235376.1	2017-08-23T03:24:46Z	USA:MS	raw intact chicken	chicken	aph(3'')-Ib,aph(6)-Id,tet(B)						6 (F)
FSIS21720020	Kentucky	PDT000235377.1	2017-08-23T03:24:47Z	USA:CA	raw intact chicken	chicken	aph(3'')-Ib,aph(6)-Id,tet(B)						6 (F)
FSIS21720026	Kentucky	PDT000235383.1	2017-08-23T03:24:48Z	USA:MS	chicken carcass	chicken	aph(3'')-Ib,aph(6)-Id,tet(B)						6 (F)
FSIS21720040	Kentucky	PDT000236194.1	2017-08-24T14:49:28Z	USA:NY	raw intact chicken	chicken	aph(3'')-Ib,aph(6)-Id,tet(B)						6 (F)
FSIS21720044	Kentucky	PDT000236199.1	2017-08-24T14:49:28Z	USA:MS	raw intact chicken	chicken	aph(3'')-Ib,aph(6)-Id,tet(B)						6 (F)
FSIS21720053	London	PDT000237209.1	2017-08-28T22:39:54Z	USA:IN	Product-Raw-Ground, Comminuted or Otherwise Nonintact-Pork	swine	tet(B)						6
FSIS21720070	Kentucky	PDT000237200.1	2017-08-28T21:39:25Z	USA:MS	chicken carcass	chicken	aph(3'')-Ib,aph(6)-Id,tet(B)						6 (F)
FSIS21720073	Kentucky	PDT000238337.1	2017-08-31T17:47:26Z	USA:OK	raw intact chicken	chicken	aph(3'')-Ib,aph(6)-Id,tet(B)						6 (F)
FSIS21720076	Kentucky	PDT000238340.1	2017-08-31T17:47:27Z	USA:GA	comminuted chicken	chicken	aac(3)-VIa,aadA1,blaCMY-2,qacEdelta1,sul1,tet(A)				4 (K)
FSIS21720080	Kentucky	PDT000238343.1	2017-08-31T18:49:28Z	USA:NY	raw intact chicken	chicken	aph(3'')-Ib,aph(6)-Id,tet(B)						6 (F)
FSIS21720107	Heidelberg	PDT000239326.1	2017-09-06T23:35:03Z	USA:IL	Product-Raw-Ground, Comminuted or Otherwise Nonintact-Pork	swine	aadA6,aph(3'')-Ib,aph(3')-Ia,aph(6)-Id,blaCMY-2,floR,fosA7,qacEdelta1,qnrB19,sul1,sul2,tet(A),tet(B),tet(O)	1			4
FSIS21720117	Kentucky	PDT000239841.1	2017-09-11T14:37:23Z	USA:LA	chicken carcass	chicken	aph(3'')-Ib,aph(6)-Id,tet(B)						6 (F)
FSIS21720127	Kentucky	PDT000240036.1	2017-09-11T17:36:30Z	USA:MS	comminuted chicken	chicken	aph(3'')-Ib,aph(6)-Id,tet(B)						6 (F)
FSIS21720128	Kentucky	PDT000240039.1	2017-09-11T17:36:30Z	USA:LA	chicken carcass	chicken	aph(3'')-Ib,aph(6)-Id,tet(B)						6 (F)
FSIS21720129	Kentucky	PDT000240043.1	2017-09-11T17:36:31Z	USA:MS	raw intact chicken	chicken	aph(3'')-Ib,aph(6)-Id,tet(B)						6 (F)
FSIS21720142	Kentucky	PDT000240090.1	2017-09-12T12:40:21Z	USA:GA	comminuted chicken	chicken	aph(3'')-Ib,aph(6)-Id,tet(B)						6 (F)
FSIS21720146	derby	PDT000240133.1	2017-09-12T16:36:22Z	USA:IA	Product-Raw-Ground, Comminuted or Otherwise Nonintact-Pork	swine	fosA7,tet(B)						6 (I1)
FSIS21720148	Kentucky	PDT000240139.1	2017-09-12T16:36:23Z	USA:CA	comminuted chicken	chicken	aph(3'')-Ib,aph(6)-Id,tet(B)						6 (F)
FSIS21720153	Kentucky	PDT000240135.1	2017-09-12T16:36:23Z	USA:MS	chicken carcass	chicken	aph(3'')-Ib,aph(6)-Id,tet(B)						6 (F)
FSIS21720161	Kentucky	PDT000240249.1	2017-09-12T21:37:20Z	USA:AR	raw intact chicken	chicken	aph(3'')-Ib,aph(6)-Id,tet(B)						6 (F)
FSIS21720164	Kentucky	PDT000240247.1	2017-09-12T21:37:19Z	USA:IA	chicken carcass	chicken	aph(3'')-Ib,aph(6)-Id,tet(B)						6 (F)
FSIS21720166	Reading	PDT000240250.1	2017-09-12T21:37:20Z	USA:MN	Comminuted Turkey	turkey	aph(3'')-Ib,aph(6)-Id,blaTEM-1,sul2,tet(A)	1 (Q1)
FSIS21720190	Kentucky	PDT000241176.1	2017-09-19T00:40:50Z	USA:WA	raw intact chicken	chicken	aph(3'')-Ib,aph(6)-Id,blaCMY-2,qnrB19,tet(B)				4		6 (F)
FSIS21720193	Kentucky	PDT000241185.1	2017-09-19T00:40:51Z	USA:GA	chicken carcass	chicken	aph(3'')-Ib,aph(6)-Id,tet(B)						6 (F)
FSIS21720194	Kentucky	PDT000247842.1	2017-10-06T18:30:51Z	USA:PA	comminuted chicken	chicken	aph(3'')-Ib,aph(6)-Id,tet(B)						6 (F)
FSIS21720198	Kentucky	PDT000247840.1	2017-10-06T18:30:51Z	USA:MI	comminuted chicken	chicken	aph(3'')-Ib,aph(6)-Id,tet(B)						6 (F)
FSIS21720202	Kentucky	PDT000247846.1	2017-10-06T18:30:52Z	USA:LA	chicken carcass	chicken	aph(3'')-Ib,aph(6)-Id,tet(B)						6 (F)
FSIS21720209	Kentucky	PDT000247020.1	2017-10-02T22:31:02Z	USA:MO	raw intact chicken	chicken	aph(3'')-Ib,aph(6)-Id,tet(B)						6 (F)
FSIS21720217	Kentucky	PDT000247025.1	2017-10-02T22:31:03Z	USA:NY	raw intact chicken	chicken	aph(3'')-Ib,aph(6)-Id,tet(B)						6
FSIS21720231	Kentucky	PDT000246502.1	2017-09-29T18:38:58Z	USA:TX	product-raw-intact-beef	cattle	aph(3'')-Ib,aph(6)-Id,tet(B)						6 (F)
FSIS21720236	Newport	PDT000247029.1	2017-10-02T22:31:05Z	USA:UT	product-raw-intact-beef	cattle	aph(3'')-Ib,aph(6)-Id,blaCMY-2,floR,sul2,tet(A)	1 (A/C)			4 (A/C)	19 (A/C)
FSIS21720255	Kentucky	PDT000247048.1	2017-10-02T22:31:09Z	USA:PA	raw intact chicken	chicken	aph(3'')-Ib,aph(6)-Id,tet(B)						6 (F)
FSIS21720267	Typhimurium	PDT000247059.1	2017-10-02T22:31:12Z	USA:MD	chicken carcass	chicken	blaCMY-2,sul2,tet(A)				4
FSIS21720269	Kentucky	PDT000247082.1	2017-10-02T22:31:16Z	USA:NC	raw intact chicken	chicken	aph(3'')-Ib,aph(6)-Id,blaCMY-2				4 (I1)
FSIS21720271	Kentucky	PDT000247087.1	2017-10-02T22:31:18Z	USA:AL	raw intact chicken	chicken	aph(3'')-Ib,aph(6)-Id,tet(B)						6 (F)
FSIS21720279	Kentucky	PDT000247084.1	2017-10-02T22:31:17Z	USA:IN	raw intact chicken	chicken	aph(3'')-Ib,aph(6)-Id,tet(B)						6 (F)
FSIS21720280	Kentucky	PDT000247088.1	2017-10-02T22:31:18Z	USA:MS	raw intact chicken	chicken	aph(3'')-Ib,aph(6)-Id,tet(B)						6 (F)
FSIS21720282	Kentucky	PDT000247852.1	2017-10-06T18:30:53Z	USA:TX	raw intact chicken	chicken	aph(3'')-Ib,aph(6)-Id,tet(B)						6 (F)
FSIS21720285	Kentucky	PDT000247850.1	2017-10-06T18:30:52Z	USA:NE	comminuted chicken	chicken	aph(3'')-Ib,aph(6)-Id,tet(B)						6 (F)
FSIS21720330	Kentucky	PDT000254342.1	2017-10-20T17:38:10Z	USA:AR	comminuted chicken	chicken	aph(3'')-Ib,aph(6)-Id,tet(B)						6 (F)
FSIS21720333	Kentucky	PDT000254344.1	2017-10-20T17:38:12Z	USA:AL	raw intact chicken	chicken	aph(3'')-Ib,aph(6)-Id,tet(B)						6
FSIS21720342	Agona	PDT000254366.1	2017-10-20T22:38:20Z	USA:MN	Comminuted Turkey	turkey	aac(3)-VIa,aadA1,aph(3'')-Ib,aph(3')-Ia,aph(6)-Id,blaCMY-2,blaTEM-1,floR,fosA7,qacEdelta1,sul1,sul2,tet(A)	1			4	5
FSIS21720364	Kentucky	PDT000254454.1	2017-10-21T02:11:33Z	USA:GA	raw intact chicken	chicken	aph(3'')-Ib,aph(6)-Id,tet(B)						6 (F)
FSIS21720366	Kentucky	PDT000254403.1	2017-10-21T02:10:11Z	USA:SC	raw intact chicken	chicken	aph(3'')-Ib,aph(6)-Id,tet(B)						6 (F)
FSIS21720369	Kentucky	PDT000254384.1	2017-10-21T00:52:57Z	USA:MS	raw intact chicken	chicken	aph(3'')-Ib,aph(6)-Id,tet(B)						6 (F)
FSIS21720372	Anatum	PDT000254390.1	2017-10-21T02:10:02Z	USA:FL	comminuted beef	cattle	tet(B)						6 (I1)
FSIS21720391	Kentucky	PDT000254396.1	2017-10-21T02:10:06Z	USA:PA	chicken carcass	chicken	aph(3'')-Ib,aph(6)-Id,tet(B)						6 (F)
FSIS21720401	Montevideo	PDT000254417.1	2017-10-21T02:10:43Z	USA:KS	product-raw-intact-beef	cattle	tet(B)						6 (I1)
FSIS21720412	Kentucky	PDT000254414.1	2017-10-21T02:10:17Z	USA:VA	raw intact chicken	chicken	aph(3'')-Ib,aph(6)-Id,tet(B)						6 (F)
FSIS21720414	Heidelberg	PDT000254398.1	2017-10-21T02:10:08Z	USA:AR	chicken carcass	chicken	fosA7,tet(B)						6 (I1)
FSIS21720426	Kentucky	PDT000254455.1	2017-10-21T02:13:03Z	USA:MN	raw intact chicken	chicken	aph(3'')-Ib,aph(6)-Id,tet(B)						6 (F)
FSIS21720437	Kentucky	PDT000257177.1	2017-10-24T14:35:44Z	USA:AR	raw intact chicken	chicken	aph(3'')-Ib,aph(6)-Id,tet(B)						6 (F)
FSIS21720448	Reading	PDT000257169.1	2017-10-24T14:35:43Z	USA:MI	Comminuted Turkey	turkey	aph(3'')-Ib,aph(6)-Id,sul2,tet(A)	1 (Q1)
FSIS21720450	Kentucky	PDT000257188.1	2017-10-24T14:35:46Z	USA:NY	raw intact chicken	chicken	aph(3'')-Ib,aph(6)-Id,tet(B)						6 (F)
FSIS21720454	Kentucky	PDT000257187.1	2017-10-24T14:35:45Z	USA:PA	comminuted chicken	chicken	aph(3'')-Ib,aph(6)-Id,tet(B)						6 (F)
FSIS21720465	Typhimurium	PDT000258705.1	2017-10-27T21:38:59Z	USA:MD	chicken carcass	chicken	blaCMY-2,sul2,tet(A)				4
FSIS21720467	Reading	PDT000258701.1	2017-10-27T21:38:58Z	USA:WI	Comminuted Turkey	turkey	aph(3'')-Ib,aph(6)-Id,sul2,tet(A)	1 (Q1)
FSIS21720482	Kentucky	PDT000260574.1	2017-11-03T14:38:24Z	USA:CA	raw intact chicken	chicken	aph(3'')-Ib,aph(6)-Id,tet(B)						6 (F)
FSIS21720483	Kentucky	PDT000260562.1	2017-11-03T14:38:21Z	USA:AL	raw intact chicken	chicken	aph(3'')-Ib,aph(6)-Id,tet(B)						6 (F)
FSIS21720487	Kentucky	PDT000260566.1	2017-11-03T14:38:22Z	USA:GA	raw intact chicken	chicken	aph(3'')-Ib,aph(6)-Id,tet(B)						6 (F)
FSIS21720503	Kentucky	PDT000260568.1	2017-11-03T14:38:23Z	USA:MI	comminuted chicken	chicken	aph(3'')-Ib,aph(6)-Id,tet(B)						6 (F)
FSIS21720521	Typhimurium	PDT000263695.1	2017-11-13T20:40:26Z	USA:CT	Product-Raw-Ground, Comminuted or Otherwise Nonintact-Pork	swine	aph(3'')-Ib,aph(3')-Ia,aph(6)-Id,blaTEM-1,floR,sul2,tet(A)	1				5
FSIS21720605	Kentucky	PDT000263696.1	2017-11-13T20:40:26Z	USA:TN	chicken carcass	chicken	aph(3'')-Ib,aph(6)-Id,tet(B)						6 (F)
FSIS21720624	Kentucky	PDT000265151.1	2017-11-17T18:35:53Z	USA:NY	raw intact chicken	chicken	aph(3'')-Ib,aph(6)-Id,blaCMY-2,tet(B)				4		6 (F)
FSIS21720630	I 4,[5],12:i:-	PDT000265436.1	2017-11-21T00:38:03Z	USA:OH	Product-Raw-Ground, Comminuted or Otherwise Nonintact-Pork	swine	blaCMY-2,tet(B)				4 (I1)
FSIS21720631	Typhimurium	PDT000265442.2	2017-11-21T00:38:05Z	USA:VA	comminuted chicken	chicken	blaCMY-2,sul2,tet(A)				4
FSIS21720642	Kentucky	PDT000267209.1	2017-11-27T18:19:58Z	USA:OH	chicken carcass	chicken	aph(3'')-Ib,aph(6)-Id,tet(B)						6 (F)
FSIS21720643	Kentucky	PDT000267212.1	2017-11-27T18:19:59Z	USA:TX	chicken carcass	chicken	aph(3'')-Ib,aph(6)-Id,sul2,tet(B)						6 (F)
FSIS21720651	Reading	PDT000267205.1	2017-11-27T18:19:58Z	USA:WI	Animal-Turkey-Turkey Carcass Sponge	turkey	aph(3'')-Ib,aph(6)-Id,blaTEM-1,sul2,tet(A)	1 (Q1)
FSIS21720662	derby	PDT000267718.1	2017-11-29T23:50:43Z	USA:CA	Product-Raw-Intact-Pork	swine	aph(3'')-Ib,aph(6)-Id,floR,fosA7,sul2,tet(A)	1				5
FSIS21720666	Dublin	PDT000267716.1	2017-11-29T23:50:42Z	USA:NY	comminuted beef	cattle	aph(3'')-Ib,aph(6)-Id,blaCMY-2,floR,sul2,tet(A)	1				5
FSIS21720670	Kentucky	PDT000267723.1	2017-11-29T23:50:46Z	USA:PA	comminuted chicken	chicken	aph(3'')-Ib,aph(6)-Id,tet(B)						6 (F)
FSIS21720677	Kentucky	PDT000268785.1	2017-12-05T02:43:31Z	USA:RI	chicken carcass	chicken	aph(3''),aph(6)-Id,tet(B)						6 (F)
FSIS21720679	Kentucky	PDT000270665.1	2017-12-11T17:42:34Z	USA:WI	comminuted chicken	chicken	aph(3'')-Ib,aph(6)-Id,tet(B)						6 (F)
FSIS21720699	Kentucky	PDT000268782.1	2017-12-05T02:43:31Z	USA:TX	raw intact chicken	chicken	aph(3'')-Ib,aph(6)-Id,sul2,tet(B)						6
FSIS21720700	Reading	PDT000268820.1	2017-12-05T02:43:37Z	USA:IA	Comminuted Turkey	turkey	aph(3'')-Ib,aph(6)-Id,blaTEM-1,sul2,tet(A)	1 (Q1)
FSIS21720714	I 4,[5],12:i:-	PDT000268799.1	2017-12-05T02:43:33Z	USA:KY	Product-Raw-Intact-Pork	swine	aac(3)-VIa,aadA1,aph(3'')-Ib,aph(3')-Ia,aph(6)-Id,blaTEM-1,bleO,qacEdelta1,sul1,sul2,tet(B)						6 (HI2)
FSIS21720716	Kentucky	PDT000272331.1	2017-12-14T17:43:12Z	USA:NJ	raw intact chicken	chicken	aph(3'')-Ib,aph(6)-Id,tet(B)						6 (F)
FSIS21720719	Kentucky	PDT000270663.1	2017-12-11T17:42:33Z	USA:TX	comminuted chicken	chicken	aph(3'')-Ib,aph(6)-Id,tet(B)						6 (F)
FSIS21720731	Kentucky	PDT000270669.1	2017-12-11T17:42:34Z	USA:AL	chicken carcass	chicken	aph(3'')-Ib,aph(6)-Id,tet(B)						6 (F)
FSIS21720732	Kentucky	PDT000270664.1	2017-12-11T17:42:33Z	USA:CA	raw intact chicken	chicken	aph(3'')-Ib,aph(6)-Id,tet(B)						6 (F)
FSIS21720754	Kentucky	PDT000272333.1	2017-12-14T17:43:13Z	USA:MD	raw intact chicken	chicken	aph(3'')-Ib,aph(6)-Id,tet(B)						6 (F)
FSIS21720755	Kentucky	PDT000272343.1	2017-12-14T17:43:15Z	USA:MS	raw intact chicken	chicken	aph(3'')-Ib,aph(6)-Id,tet(B)						6 (F)
FSIS21720759	Kentucky	PDT000273295.1	2017-12-19T00:40:47Z	USA:IA	chicken carcass	chicken	aph(3'')-Ib,aph(6)-Id,tet(B)						6 (F)
FSIS21720772	Kentucky	PDT000273306.1	2017-12-19T00:40:50Z	USA:AL	raw intact chicken	chicken	aph(3'')-Ib,aph(6)-Id,tet(B)						6 (F)
FSIS21720773	Kentucky	PDT000273275.1	2017-12-19T00:40:42Z	USA:NC	comminuted chicken	chicken	aph(3'')-Ib,aph(6)-Id,tet(B)						6 (F)
FSIS21720783	Kentucky	PDT000273310.1	2017-12-19T00:40:51Z	USA:GA	comminuted chicken	chicken	aph(3'')-Ib,aph(6)-Id,tet(B)						6 (F)
FSIS21720784	Kentucky	PDT000273309.1	2017-12-19T00:40:51Z	USA:KY	chicken carcass	chicken	aph(3'')-Ib,aph(6)-Id,tet(B)						6 (F)
FSIS21720801	Kentucky	PDT000273686.1	2017-12-21T02:42:55Z	USA:AL	raw intact chicken	chicken	aph(3'')-Ib,aph(6)-Id,tet(B)						6 (F)
FSIS21720805	Bovismorbificans	PDT000274515.1	2017-12-26T16:42:07Z	USA:WI	Product-Raw-Ground, Comminuted or Otherwise Nonintact-Pork	swine	tet(B)						6 (I1)
FSIS21720809	Kentucky	PDT000274528.1	2017-12-26T17:46:07Z	USA:VA	raw intact chicken	chicken	aph(3'')-Ib,aph(6)-Id,tet(B)						6 (F)
FSIS21720830	Kentucky	PDT000274529.1	2017-12-26T17:46:07Z	USA:TX	raw intact chicken	chicken	aph(3'')-Ib,aph(6)-Id,tet(B)						6 (F)
FSIS21720841	Oranienburg	PDT000275590.1	2018-01-04T17:40:00Z	USA:NC	raw intact chicken	chicken	dfrB3,qacEdelta1,sul1,tet(B)						6 (HI2)
FSIS21720842	Heidelberg	PDT000274941.1	2017-12-29T01:40:23Z	USA:OK	comminuted chicken	chicken	aph(3'')-Ib,aph(3')-IIa,aph(6)-Ic,aph(6)-Id,ble,fosA7,tet(B)			3			6 (HI2)
FSIS21720848	Kentucky	PDT000274530.1	2017-12-26T17:46:07Z	USA:TX	comminuted chicken	chicken	aph(3'')-Ib,aph(6)-Id,tet(B)						6 (F)
FSIS21720867	Agona	PDT000274838.1	2017-12-28T21:43:08Z	USA:MN	Animal-Turkey-Turkey Carcass Sponge	turkey	aadA7,aph(3')-Ia,blaCMY-2,fosA7,qacEdelta1,sul1,tet(A)				4 (I1)
FSIS21720869	Typhimurium	PDT000274842.1	2017-12-28T21:43:08Z	USA:NJ	comminuted chicken	chicken	blaCMY-2,sul2,tet(A)				4
FSIS21720888	Kentucky	PDT000276544.1	2018-01-06T01:38:49Z	USA:AL	raw intact chicken	chicken	aph(3'')-Ib,aph(6)-Id,tet(B)						6 (F)
FSIS21720889	Kentucky	PDT000276563.1	2018-01-06T01:38:52Z	USA:MO	raw intact chicken	chicken	aph(3'')-Ib,aph(6)-Id,tet(B)						6 (F)
FSIS21720896	Kentucky	PDT000276547.1	2018-01-06T01:38:49Z	USA:CO	comminuted chicken	chicken	aph(3'')-Ib,aph(6)-Id,tet(B)						6 (F)
FSIS21820904	London	PDT000276924.1	2018-01-09T15:52:44Z	USA:WI	Product-Raw-Ground, Comminuted or Otherwise Nonintact-Pork	swine	tet(B)						6
FSIS21820907	Newport	PDT000277067.1	2018-01-09T19:49:05Z	USA:TX	product-raw-intact-beef	cattle	aph(3'')-Ib,aph(6)-Id,blaCMY-2,floR,sul2,tet(A)	1			4 (A/C)	20 (A/C)
FSIS21820920	Kentucky	PDT000281137.1	2018-01-24T17:56:36Z	USA:LA	chicken carcass	chicken	aph(3'')-Ib,aph(6)-Id,tet(B)						6 (F)
FSIS21820941	Kentucky	PDT000281172.1	2018-01-24T17:56:45Z	USA:CA	comminuted chicken	chicken	aph(3'')-Ib,aph(6)-Id,tet(B)						6 (F)
FSIS21820949	Typhimurium	PDT000281241.1	2018-01-24T17:57:06Z	USA:DE	raw intact chicken	chicken	blaCMY-2,sul2,tet(A)				4
FSIS21820950	Kentucky	PDT000281248.1	2018-01-24T17:57:08Z	USA:MS	raw intact chicken	chicken	aph(3'')-Ib,aph(6)-Id,tet(B)						6 (F)
FSIS21820951	Kentucky	PDT000281244.1	2018-01-24T17:57:07Z	USA:IL	raw intact chicken	chicken	aph(3'')-Ib,aph(6)-Id,tet(B)						6 (F)
FSIS21820959	Infantis	PDT000281250.1	2018-01-24T17:57:09Z	USA:WI	Comminuted Turkey	turkey	aph(3'')-Ib,aph(6)-Id,blaCMY-2,floR,sul2,tet(A)				4	5
FSIS21820979	Kentucky	PDT000281376.1	2018-01-24T17:57:36Z	USA:MI	raw intact chicken	chicken	aph(3'')-Ib,aph(6)-Id,tet(B)						6 (F)
FSIS21820984	Kentucky	PDT000281245.1	2018-01-24T17:57:07Z	USA:OH	raw intact chicken	chicken	aph(3'')-Ib,aph(6)-Id,tet(B)						6 (F)
FSIS21821000	Reading	PDT000281778.1	2018-01-25T23:42:22Z	USA:UT	Comminuted Turkey	turkey	aph(3'')-Ib,aph(6)-Id,blaTEM-1,sul2,tet(A)	1 (Q1)
FSIS21821008	Kentucky	PDT000282243.1	2018-01-27T14:46:04Z	USA:CA	raw intact chicken	chicken	aph(3'')-Ib,aph(6)-Id,tet(B)						6 (F)
FSIS21821016	Kentucky	PDT000283004.1	2018-01-30T22:50:04Z	USA:VT	chicken carcass	chicken	aph(3'')-Ib,aph(6)-Id,tet(B)						6 (F)
FSIS21821018	Reading	PDT000282996.1	2018-01-30T22:50:02Z	USA:AR	Comminuted Turkey	turkey	aph(3'')-Ib,aph(6)-Id,blaTEM-1,sul2,tet(A)	1 (Q1)
FSIS21821039	I 4,[5],12:i:-	PDT000284967.1	2018-02-06T00:55:51Z	USA:NE	Product-Raw-Intact-Pork	swine	ant(2'')-Ia,aph(3'')-Ib,aph(3')-Ia,aph(6)-Id,blaCMY-2,blaTEM-1,cmlA5,dfrA1,floR,sul2,tet(A)	1			4	5
FSIS21821043	Kentucky	PDT000284962.1	2018-02-06T00:55:50Z	USA:CA	chicken carcass	chicken	aph(3'')-Ib,aph(6)-Id,tet(B)						6 (F)
FSIS21821045	Reading	PDT000284945.1	2018-02-06T00:55:47Z	USA:MN	Comminuted Turkey	turkey	aph(3'')-Ib,aph(6)-Id,sul2,tet(A)	1 (Q1)
FSIS21821056	Kentucky	PDT000285900.1	2018-02-08T22:48:22Z	USA:VA	chicken carcass	chicken	aph(3'')-Ib,aph(6)-Id,tet(B)						6 (F)
FSIS21821067	Kentucky	PDT000289195.1	2018-02-23T23:51:20Z	USA:OH	chicken carcass	chicken	aph(3'')-Ib,aph(6)-Id,tet(B)						6 (F)
FSIS21821071	Kentucky	PDT000288016.1	2018-02-20T16:53:41Z	USA:OH	comminuted chicken	chicken	aph(3'')-Ib,aph(6)-Id,tet(B)						6 (F)
FSIS21821093	Kentucky	PDT000287252.1	2018-02-14T20:03:19Z	USA:MO	raw intact chicken	chicken	aph(3'')-Ib,aph(6)-Id,tet(B)						6 (F)
FSIS21821114	Kentucky	PDT000288163.1	2018-02-21T00:50:18Z	USA:MI	comminuted chicken	chicken	aph(3'')-Ib,aph(6)-Id,tet(B)						6 (F)
FSIS21821123	Kentucky	PDT000288161.1	2018-02-21T00:50:18Z	USA:VT	raw intact chicken	chicken	aph(3'')-Ib,aph(6)-Id,tet(B)						6 (F)
FSIS21821147	Rough_O:r:1,5	PDT000294587.1	2018-03-15T04:43:03Z	USA:DE	chicken carcass	chicken	aac(3)-IV,aadA1,aph(4)-Ia,floR,qacEdelta1,sul1,tet(A)					5
FSIS21821160	Kentucky	PDT000290439.1	2018-03-01T02:50:47Z	USA:LA	raw intact chicken	chicken	aph(3'')-Ib,aph(6)-Id,tet(B)						6 (F)
FSIS21821231	Kentucky	PDT000293837.1	2018-03-09T19:50:40Z	USA:GA	raw intact chicken	chicken	blaCMY-2				4
FSIS21821237	Kentucky	PDT000294599.1	2018-03-15T04:43:06Z	USA:OH	raw intact chicken	chicken	aph(3'')-Ib,aph(6)-Id,blaCMY-2,tet(B)				4 (I1)
FSIS21821246	Kentucky	PDT000294537.1	2018-03-14T23:42:34Z	USA:NY	chicken carcass	chicken	blaCMY-2,tet(B)				4 (I1)
FSIS21821247	Typhimurium	PDT000294534.1	2018-03-14T23:42:34Z	USA:KS	product-raw-intact-beef	cattle	aph(3'')-Ib,aph(6)-Id,blaCMY-2,floR,sul2,tet(A)	1			4
FSIS21821266	4,[5],12:d:­	PDT000294849.1	2018-03-16T21:41:33Z	USA:VA	Comminuted Turkey	turkey	tet(B)						6
FSIS21821268	Kentucky	PDT000294860.1	2018-03-16T21:41:36Z	USA:NC	raw intact chicken	chicken	aph(3'')-Ib,aph(6)-Id,blaCMY-2				4
FSIS21821275	Kentucky	PDT000294850.1	2018-03-16T21:41:34Z	USA:AR	raw intact chicken	chicken	aph(3'')-Ib,aph(6)-Id,tet(B)						6
FSIS21821319	Infantis	PDT000297819.1	2018-03-23T23:42:11Z	USA:WI	Product-Raw-Ground, Comminuted or Otherwise Nonintact-Pork	swine	tet(B)						6
FSIS21821341	Kentucky	PDT000300011.1	2018-03-27T20:44:11Z	USA:AL	raw intact chicken	chicken	aph(3'')-Ib,aph(6)-Id,tet(B)						6 (F)
FSIS21821347	Kentucky	PDT000300021.1	2018-03-27T20:44:13Z	USA:CA	raw intact chicken	chicken	aph(3'')-Ib,aph(6)-Id,tet(B)						6 (F)
FSIS21821348	Kentucky	PDT000300016.1	2018-03-27T20:44:12Z	USA:CO	comminuted chicken	chicken	aph(3'')-Ib,aph(6)-Id,tet(B)						6 (F)
FSIS21821351	Kentucky	PDT000300884.1	2018-03-30T18:43:43Z	USA:NY	raw intact chicken	chicken	aph(3'')-Ib,aph(6)-Id,tet(B)						6
FSIS21821364	Johannesburg	PDT000300888.1	2018-03-30T18:43:44Z	USA:FL	Product-Raw-Ground, Comminuted or Otherwise Nonintact-Pork	swine	tet(B)						6 (I1)
FSIS21821368	Kentucky	PDT000302992.1	2018-04-03T16:39:41Z	USA:CA	raw intact chicken	chicken	aph(3'')-Ib,aph(6)-Id,tet(B)						6 (F)
FSIS21821404	Agona	PDT000305011.1	2018-04-10T14:44:35Z	USA:SD	Product-Raw-Intact-Pork	swine	fosA7,tet(B)						6
FSIS21821433	Cerro	PDT000305782.1	2018-04-13T16:43:34Z	USA:TX	product-raw-intact-beef	cattle	tet(B)						6 (I1)
FSIS21821436	Newport	PDT000305781.1	2018-04-13T16:43:33Z	USA:UT	comminuted beef	cattle	aph(3'')-Ib,aph(6)-Id,blaCMY-2,floR,sul2,tet(A)	1			4 (A/C)	5
FSIS31700006	Dublin	PDT000275069.1	2018-01-02T14:41:25Z	USA:AZ	comminuted beef	cattle	aph(3'')-Ib,aph(3')-Ia,aph(6)-Id,blaCMY-2,floR,sul2,tet(A)	1				5
FSIS31700008	Kentucky	PDT000275073.1	2018-01-02T14:41:26Z	USA:FL	Product-Raw-Intact-Pork	swine	aph(3'')-Ib,aph(6)-Id,tet(B)						6 (F)
FSIS31700015	Kentucky	PDT000277113.1	2018-01-09T20:43:53Z	USA:SC	raw intact chicken	chicken	aph(3'')-Ib,aph(6)-Id,tet(B)						6 (F)
FSIS31700021	Kentucky	PDT000275070.1	2018-01-02T14:41:25Z	USA:PA	comminuted chicken	chicken	aph(3'')-Ib,aph(6)-Id,tet(B)						6 (F)
FSIS31700024	Newport	PDT000275071.1	2018-01-02T14:41:25Z	USA:KY	comminuted beef	cattle	aph(3'')-Ib,aph(6)-Id,blaCMY-2,floR,sul2,tet(A)	1			4	5
FSIS31800028	Kentucky	PDT000276554.1	2018-01-06T01:38:51Z	USA:PA	comminuted chicken	chicken	aph(3'')-Ib,aph(6)-Id,tet(B)						6 (F)
FSIS31800033	Kentucky	PDT000276555.1	2018-01-06T01:38:51Z	USA:PA	chicken carcass	chicken	aph(3'')-Ib,aph(6)-Id,tet(B)						6 (F)
FSIS31800034	Reading	PDT000276551.1	2018-01-06T01:38:50Z	USA:IA	Comminuted Turkey	turkey	aph(3'')-Ib,aph(6)-Id,blaTEM-1,sul2,tet(A)	1 (Q1)
FSIS31800043	Kentucky	PDT000276939.1	2018-01-09T15:52:47Z	USA:CA	chicken carcass	chicken	aph(3'')-Ib,aph(6)-Id,tet(B)						6 (F)
FSIS31800045	Kentucky	PDT000281177.1	2018-01-24T17:56:46Z	USA:MS	chicken carcass	chicken	aph(3'')-Ib,aph(6)-Id,tet(B)						6
FSIS31800048	Reading	PDT000281186.1	2018-01-24T17:56:48Z	USA:WI	Comminuted Turkey	turkey	aph(3'')-Ib,aph(6)-Id,blaTEM-1,sul2,tet(A)	1 (Q1)
FSIS31800064	Dublin	PDT000282605.1	2018-01-30T02:46:26Z	USA:PA	comminuted beef	cattle	aph(3'')-Ib,aph(6)-Id,blaCMY-2,blaTEM,floR,sul2,tet(A)	1				5
FSIS31800081	Kentucky	PDT000282607.1	2018-01-30T02:46:27Z	USA:GA	raw intact chicken	chicken	aph(3'')-Ib,aph(6)-Id,tet(B)						6 (F)
FSIS31800085	Senftenberg	PDT000282600.1	2018-01-30T02:46:25Z	USA:WI	Product-Raw-Ground, Comminuted or Otherwise Nonintact-Pork	swine	aac(3)-IId,aadA2,aph(3''),aph(3')-Ia,blaTEM-1,bleO,catA1,dfrA12,floR,mph(A),qacEdelta1,sul1,sul2,tet(B)		2
FSIS31800086	Dublin	PDT000284980.1	2018-02-06T00:55:54Z	USA:ID	product-raw-intact-beef	cattle	aph(3''),aph(6)-Id,floR,sul2,tet(A)	1
FSIS31800088	Kentucky	PDT000285865.1	2018-02-08T22:48:12Z	USA:VA	raw intact chicken	chicken	aph(3'')-Ib,aph(6)-Id,tet(B)						6 (F)
FSIS31800090	Kentucky	PDT000288416.1	2018-02-22T00:46:24Z	USA:PA	comminuted chicken	chicken	aph(3'')-Ib,aph(6)-Id,tet(B)						6 (F)
FSIS31800100	Typhimurium	PDT000284955.1	2018-02-06T00:55:49Z	USA:MD	raw intact chicken	chicken	aph(3')-Ia,blaCMY-2,sul2,tet(A)				4
FSIS31800101	Kentucky	PDT000284942.1	2018-02-06T00:55:46Z	USA:OK	chicken carcass	chicken	aph(3'')-Ib,aph(6)-Id,tet(B)						6 (F)
FSIS31800104	Reading	PDT000284957.1	2018-02-06T00:55:49Z	USA:MN	Comminuted Turkey	turkey	aph(3'')-Ib,aph(6)-Id,blaTEM-1,sul2,tet(A)	1 (Q1)
FSIS31800106	Kentucky	PDT000288413.1	2018-02-22T00:46:23Z	USA:PA	raw intact chicken	chicken	aph(3'')-Ib,aph(6)-Id,tet(B)						6 (F)
FSIS31800108	Kentucky	PDT000286871.1	2018-02-12T20:50:21Z	USA:CA	raw intact chicken	chicken	aph(3'')-Ib,aph(6)-Id,tet(B)						6 (F)
FSIS31800119	Kentucky	PDT000285886.1	2018-02-08T22:48:18Z	USA:LA	chicken carcass	chicken	aph(3'')-Ib,aph(6)-Id,tet(B)						6 (F)
FSIS31800125	Kentucky	PDT000285903.1	2018-02-08T22:48:23Z	USA:CA	raw intact chicken	chicken	aph(3'')-Ib,aph(6)-Id,tet(B)						6 (F)
FSIS31800126	Kentucky	PDT000285860.1	2018-02-08T22:48:11Z	USA:AL	chicken carcass	chicken	aph(3'')-Ib,aph(6)-Id,tet(B)						6 (F)
FSIS31800129	Kentucky	PDT000286856.1	2018-02-12T14:47:03Z	USA:CA	chicken carcass	chicken	aph(3'')-Ib,aph(6)-Id,tet(B)						6 (F)
FSIS31800130	Kentucky	PDT000286857.1	2018-02-12T14:47:03Z	USA:TX	raw intact chicken	chicken	aph(3'')-Ib,aph(6)-Id,tet(B)						6 (F)
FSIS31800147	Kentucky	PDT000290328.1	2018-02-28T20:49:06Z	USA:NY	chicken carcass	chicken	aph(3'')-Ib,aph(6)-Id,tet(B)						6 (F)
FSIS31800148	Kentucky	PDT000287670.1	2018-02-16T16:53:32Z	USA:OH	chicken carcass	chicken	aph(3'')-Ib,aph(6)-Id,tet(B)						6 (F)
FSIS31800150	Kentucky	PDT000287664.1	2018-02-16T16:53:32Z	USA:CO	comminuted chicken	chicken	aph(3'')-Ib,aph(6)-Id,tet(B)						6 (F)
FSIS31800152	Kentucky	PDT000288419.1	2018-02-22T00:46:25Z	USA:OH	comminuted chicken	chicken	aph(3'')-Ib,aph(6)-Id,tet(B)						6 (F)
FSIS31800192	Kentucky	PDT000292809.1	2018-03-07T02:58:33Z	USA:TX	raw intact chicken	chicken	aph(3'')-Ib,aph(6)-Id,tet(B)						6 (F)
FSIS31800211	Albany	PDT000293281.1	2018-03-08T21:50:26Z	USA:NC	Comminuted Turkey	turkey	aac(3)-VIa,aadA1,blaHER-3,tet(B)						6
FSIS31800235	Dublin	PDT000294648.1	2018-03-15T19:44:18Z	USA:PA	comminuted beef	cattle	aph(3'')-Ib,aph(6)-Id,blaCMY-2,floR,sul2,tet(A)	1
FSIS31800255	Reading	PDT000296569.1	2018-03-22T16:44:59Z	USA:MN	Comminuted Turkey	turkey	aph(3'')-Ib,aph(6)-Id,sul2,tet(A)	1 (Q1)
FSIS31800268	Kentucky	PDT000299720.1	2018-03-27T14:50:52Z	USA:LA	raw intact chicken	chicken	aph(3'')-Ib,aph(6)-Id,tet(B)						6 (F)
FSIS31800276	Kentucky	PDT000299727.1	2018-03-27T14:50:54Z	USA:IL	raw intact chicken	chicken	aph(3'')-Ib,aph(6)-Id,tet(B)						6 (F)
FSIS31800278	Typhimurium	PDT000299747.1	2018-03-27T15:44:32Z	USA:VA	chicken carcass	chicken	blaCMY-2,sul2,tet(A)				4
FSIS31800292	Newport	PDT000299744.1	2018-03-27T15:44:31Z	USA:ID	product-raw-intact-beef	cattle	aph(3'')-Ib,aph(6)-Id,blaCMY-2,floR,sul2,tet(A)	1			4	5
FSIS31800307	Reading	PDT000305016.1	2018-04-10T14:44:37Z	USA:TN	Comminuted Turkey	turkey	aph(3'')-Ib,aph(6)-Id,blaTEM-1,sul2,tet(A)	1 (Q1)
FSIS31800324	Typhimurium	PDT000306418.1	2018-04-16T14:57:55Z	USA:AL	chicken carcass	chicken	blaCMY-2				4 (I1)

## Sheet: Supplementary Table 5
Supplementary Table 5. Isolates from NCBI containing ARC1.
Accession Number	Bacteria	Plasmid?
AB571791.1	Salmonella Typhimurium	no
AB591424.1	Salmonella Typhimurium	F
AP014565.1	Salmonella Typhimurium	no
AP017617.1	E. coli	no
AP017620.1	E. coli	no
CP000604.1	Salmonella Newport	AC
CP006029.1	E. coli	AC
CP007137.1	E. coli	yes
CP007486.1	Salmonella	yes
CP007592.1	E. coli	no
CP007636.1	Vibrio cholera	AC
CP009409.2	Salmonella Heidelberg	AC
CP009410.2	Salmonella Typhimurium	AC
CP009411.2	Salmonella Newport	AC
CP009412.2	Salmonella Agona	AC
CP009413.2	Salmonella Infantis	AC
CP009414.2	Salmonella Kentucky	AC
CP009560.1	Salmonella Newport	AC
CP009562.1	Salmonella Newport	AC
CP009563.1	Salmonella Newport	AC
CP009564.1	Salmonella Newport	AC
CP009567.1	Salmonella Newport	AC
CP009570.1	Salmonella Newport	AC
CP010172.1	E. coli	no
CP011061.1	E. coli	no
CP011429.1	Salmonella Typhimurium	AC
CP012599.1	Salmonella Newport	no
CP012682.1	Salmonella Typhimurium	AC
CP014658.1	Salmonella Anatum	AC
CP014978.1	Salmonella Typhimurium	AC
CP016013.1	Salmonella Newport	AC
CP017633.1	E. coli	F
CP017987.1	Klebsiella pneumonia	AC
CP018318.1	Klebsiella pneumonia	AC
CP018689.1	Klebsiella pneumonia	AC
CP018698.1	Klebsiella pneumonia	AC
CP018704.1	Klebsiella pneumonia	AC
CP018710.1	Klebsiella pneumonia	AC
CP018716.1	Klebsiella pneumonia	AC
CP018722.1	Klebsiella pneumonia	AC
CP019001.1	E. coli	AC
CP020841.1	Klebsiella pneumonia	no
CP020933.1	E. coli	no
CP021960.1	Klebsiella pneumonia	no
CP022229.1	E. coli	no
CP022359.1	Shewanella bicestrii	AC
CP022498.1	Salmonella Manhatten	Q1
CP022498.1	Salmonella Manhatten	Q1
CP022499.1	Salmonella Manhatten	Q1
CP023647.1	Shigella sonnei	yes
CP024459.1	Klebsiella pneumonia	F
CP024824.1	E. coli	AC
FJ621586.1	E. coli	AC
FJ621587.1	Salmonella	AC
FJ621588.1	E. coli	AC
HQ023861.1	E. coli	AC
HQ023862.1	E. coli	AC
HQ023863.1	E. coli	AC
JF267651.1	Salmonella Dublin	AC
JN687470.1	Providencia stuartii	AC
JN983043.1	Salmonella Heidelberg	AC
JN983045.1	Salmonella Heidelberg	AC
JN983048.1	Salmonella Heidelberg	AC
KF152885.1	E. coli	AC
KJ909290.1	Aeromonas salmonicida	AC
KP056256.1	E. coli	AC
KR091911.1	Salmonella Corvallis	AC
KR559888.1	Klebsiella pneumonia	AC
KR559889.1	Klebsiella pneumonia	AC
KT962845.1	Proteus mirabilis	no
KT990220.1	E. coli	F
KU160531.1	Vibrio alginolyticus	AC
KU306390.1	Vibrio	no
KU321583.1	E. coli	F
KU605240.1	Proteus mirabilis	AC
KX029331.1	Klebsiella pneumonia	AC
KX129949.1	E. coli	HI2
KX243416.1	Proteus mirabilis	no
KY014465.1	Vibrio parahaemolyticus	AC
KY399978.1	Vibrio cholera	AC
KY748190.1	E. coli	I1
KY865321.1	E. coli	F
KY865322.1	E. coli	F
KY986974.1	Citrobacter freundii	AC
LM996860.1	E. coli	yes
MF497432.1	Vibrio alginolyticus	AC
MF535908.1	E. coli	F
MF589339.1	E.coli	F

## Sheet: Supplementary Table 6
Supplementary Table 6. Isolates from NCBI containing ARC2.
Accession Number	Bacteria	Plasmid?
AF550415.2	Citrobacter freundii	yes
AY333434.1	Salmonella Typhimurium	yes
CP003225.1	Klebsiella pneumonia	yes
CP003848.1	Acinetobacter baumannii	yes
CP004087.1	Salmonella Heidelberg	yes
CP006632.1	E. coli	yes
CP008735.1	E. coli	yes
CP010351.1	Acinetobacter johnsonii	yes
CP012626.1	E. coli	yes
CP014478.1	Acinetobacter pittii	yes
CP017059.1	Citrobacter freundii	yes
CP017082.1	Proteus mirabilis	no
CP017084.1	Proteus mirabilis	yes
CP017085.1	Proteus mirabilis	no
CP019220.1	Klebsiella pneumonia	yes
CP019890.1	Enterobacter cloacae	yes
CP021841.1	E. coli	yes
CP021845.1	E. coli	yes
CP021952.1	Klebsiella pneumonia	yes
CP022146.1	Klebsiella pneumonia	yes
CP022533.1	Enterobacter cloacae	yes
CP022696.1	Citrobacter farmeri	yes
CP023145.1	E. coli	yes
CP024192.1	Klebsiella pneumonia	yes
CP024477.1	Pseudomonas aeruginosa	no
CP024522.1	Klebsiella pneumonia	yes
CP024529.1	Klebsiella pneumonia	yes
CP024557.1	Klebsiella pneumonia	yes
EU418931.1	E. coli	I1
HQ451074.1	E. coli	yes
HQ840942.1	Salmonella Typhimurium	HI1
JF503991.1	E. coli	AC
JF714412.2	E. coli	yes
JX101647.1	Actinobacter sp.	yes
JX101693.1	Enterobacter cloacae	yes
JX988621.1	Klebsiella pneumonia	yes
KC999035.4	E. coli	yes
KJ802404.1	E. coli	yes
KJ802405.1	Providencia stuartii	yes
KJ817377.1	Vibrio cholera	yes
KM884819.1	Acinetobacter baumannii	yes
KP010147.1	E. coli	yes
KP899804.1	Salmonella Typhimurium	HI1
KT852971.1	Acinetobacter baumannii	yes
KU355874.1	E. coli	yes
KX810825.1	Salmonella Typhimurium	yes
KX839207.1	Klebsiella pneumonia	yes
KX957969.1	Vibrio alginolyticus	yes
KX957970.1	Vibrio parahaemolyticus	yes
KY748190.1	E. coli	yes
KY865323.1	E. coli	yes
KY887590.1	E. coli	yes
KY887591.1	E. coli	yes
KY887592.1	Citrobacter freundii	AC
KY887594.1	Klebsiella pneumonia	yes
KY887595.1	E. coli	yes
KY887596.1	E. coli	yes
LC056337.1	E. coli	yes
LC056449.1	E. coli	yes
LN610760.1	Citrobacter freundii	yes
LT599826.1	E. coli	yes
LT599827.1	E. coli	yes
MF135602.1	Klebsiella pneumonia	yes
MF150084.1	Klebsiella pneumonia	yes
MF150118.1	Proteus mirabilis	yes
MF589339.1	E. coli	yes

## Sheet: Supplementary Table 7
Supplementary Table 7. Isolates from NCBI containing ARC3.
Accession Number	Bacteria	Plasmid?
AB255435.1	E. coli	F
AB366441.1	Salmonella Dublin	N
CP000744.1	Pseudomonas aeruginosa	no
CP008857.1	Pseudomonas aeruginosa
CP019905.1	E. coli	I1
JN983042.1	Salmonella Heidelberg	HI2
JX469830.1	Uncultured bacteria	yes
KM409652.1	E. coli	I1
U00004.1	Tn5, E. coli

## Sheet: Supplementary Table 8
Supplementary Table 8. Isolates from NCBI containing ARC4.
Accession Number	Bacteria	Plasmid?
AB571791.1	Salmonella Typhimurium	no
AB591424.1	Salmonella Typhimurium	AC FIB
AB933351.1	Klebsiella pneumonia	no
AJ875405.3	Klebsiella pneumonia	yes
AP014565.1	Salmonella Typhimurium	no
AY253913.1	Salmonella Cholerasuis	yes
AY509004.1	Salmonella Cholerasuis	yes
AY581205.1	Salmonella Typhimurium	yes
AY581206.1	Salmonella Thompson	yes
AY581207.1	Salmonella Typhimurium	yes
CP000604.1	Salmonella Newport	AC
CP001121.1	Salmonella Kentucky	I1
CP006661.1	Klebsiella pneumonia	AC
CP007636.1	Vibrio cholera	AC
CP009409.2	Salmonella Heidelberg	AC
CP009410.2	Salmonella Typhimurium	AC
CP009411.2	Salmonella Newport	AC
CP009412.2	Salmonella Agona	AC
CP009413.2	Salmonella Infantis	AC
CP009414.2	Salmonella Kentucky	AC
CP009560.1	Salmonella Newport	AC
CP009562.1	Salmonella Newport	AC
CP009564.1	Salmonella Newport	AC
CP009567.1	Salmonella Newport	AC
CP009570.1	Salmonella Newport	AC
CP011429.1	Salmonella Typhimurium	AC
CP012597.1	Salmonella Newport	yes
CP012597.1	Salmonella Newport	yes
CP012599.1	Salmonella Newport	no
CP012923.1	Salmonella Heidelberg	I1
CP012936.1	Salmonella Heidelberg	I1
CP014658.1	Salmonella Anatum	AC
CP014966.1	Salmonella Typhimurium	AC
CP014978.1	Salmonella Typhimurium	AC
CP015347.1	Proteus mirabilis	no
CP015835.1	E. coli	AC
CP016013.1	Salmonella Newport	AC
CP016516.1	Salmonella Heidelberg	I1
CP016522.1	Salmonella Heidelberg	I1
CP016548.1	E. coli	K
CP016568.1	Salmonella Heidelberg	I1
CP016572.1	Salmonella Heidelberg	I1
CP016865.1	Salmonella Typhimurium	I1
CP018772.1	Klebsiella pneumonia	yes
CP018817.1	Klebsiella pneumonia	AC
CP020049.1	E. coli	AC
CP020056.1	E. coli	AC
CP020841.1	Klebsiella pneumonia	no
CP021536.1	E. coli	AC
CP021719.1	E. coli	AC
CP021841.1	E. coli	I1
CP021845.1	E. coli	I1
CP021936.1	E. coli	AC
CP021952.1	Klebsiella pneumonia	AC
CP021960.1	Klebsiella pneumonia	no
CP022064.1	Salmonella Typhimurium var5-	no
CP022126.1	Klebsiella pneumonia	AC
CP023502.1	Klebsiella pneumonia	no
DQ017661.1	Salmonella	I1
EU331425.1	Salmonella Newport	colE1
EU331426.1	Klebsiella pneumonia	colE1
FJ621586.1	E. coli	AC
FJ621587.1	Salmonella	AC
FJ621588.1	E. coli	AC
HG428759.1	Salmonella Typhimurium	I1
HQ023862.1	E. coli	AC
HQ023863.1	E. coli	AC
JF267651.1	Salmonella Dublin	AC
JF503991.1	E. coli	AC
JF714412.2	E. coli	AC
JN157804.1	Klebsiella pneumonia	AC
JN687470.1	Providencia stuartii	AC
JN861072.1	Klebsiella pneumonia	AC
JN983043.1	Salmonella Heidelberg	AC
JN983044.1	Salmonella Heidelberg
JN983045.1	Salmonella Heidelberg	AC
JN983048.1	Salmonella Heidelberg	AC
JX442976.1	Klebsiella pneumonia	AC
KC999035.4	E. coli	AC
KF992018.2	Klebsiella pneumonia	AC
KJ588779.1	Klebsiella pneumonia	AC
KJ802404.1	E. coli	AC
KJ802405.1	Providencia stuartii	AC
KJ909290.1	Aeromonas salmonicida	AC
KP056256.1	E. coli	AC
KR091911.1	Salmonella Corvallis	AC
KR559888.1	Klebsiella pneumonia	AC
KR559889.1	Klebsiella pneumonia	AC
KR905384.1	E. coli	K
KR905385.1	E. coli	K
KR905386.1	E. coli	K
KR905387.1	E. coli	K
KR905388.1	E. coli	K
KR905389.1	E. coli	K
KR905390.1	E. coli	K
KT347600.1	E. coli	HI2/AC
KU160531.1	Vibrio alginolyticus	AC
KU312044.1	E. coli	K
KU605240.1	Proteus mirabilis	AC
KU726616.1	Salmonella Stanley	AC
KX147633.1	Citrobacter freundii	AC
KX452392.1	E. coli	I1
KX636095.1	Klebsiella pneumonia	AC
KX786648.1	Enterobacter cloacae	AC
KX815983.1	Salmonella Dublin	AC
KY014465.1	Vibrio parahaemolyticus	AC
LC019731.1	E. coli	I1
LC056425.1	E. coli	I1
LN831184.1	Vibrio cholera	yes
Y17716.1	Klebsiella oxytoca	yes

## Sheet: Supplementary Table 9
Supplementary Table 9. Isolates from NCBI containing ARC5.
Accession Number	Bacteria	Plasmid?
AB571791.1	Salmonella Typhimurium	no
AB591424.1	Salmonella Typhimurium	yes
AP014565.1	Salmonella Typhimurium	no
BK008853.1	Aeromonas bestiarum	yes
CP000604.1	Salmonella Newport	AC
CP001485.1	Vibrio cholera	no
CP003069.1	Vibrio cholera	no
CP006029.1	E. coli	AC
CP006947.1	Vibrio cholera	no
CP007137.1	E. coli	AC
CP007634.1	Vibrio cholera	no
CP007634.1	Vibrio cholera	no
CP007636.1	Vibrio cholera	AC
CP009042.1	Vibrio cholera	no
CP009409.2	Salmonella Heidelberg	AC
CP009410.2	Salmonella Typhimurium	AC
CP009411.2	Salmonella Newport	AC
CP009412.2	Salmonella Agona	AC
CP009413.2	Salmonella Infantis	AC
CP009414.2	Salmonella Kentucky	AC
CP009560.1	Salmonella Newport	AC
CP009562.1	Salmonella Newport	AC
CP009563.1	Salmonella Newport	AC
CP009564.1	Salmonella Newport	AC
CP009567.1	Salmonella Newport	AC
CP009570.1	Salmonella Newport	AC
CP010143.1	E. coli	no
CP010155.1	E. coli	yes
CP010168.1	E. coli	yes
CP010243.1	E. coli	yes
CP011429.1	Salmonella Typhimurium	AC
CP012599.1	Salmonella Newport	no
CP012682.1	Salmonella Typhimurium	AC
CP014658.1	Salmonella Anatum	AC
CP014978.1	Salmonella Typhimurium	AC
CP016013.1	Salmonella Newport	AC
CP017633.1	E. coli	F
CP017987.1	Klebsiella pneumonia	AC
CP018104.1	E. coli	I1
CP018110.1	E. coli	I1
CP018116.1	E. coli	I1
CP018122.1	E. coli	I1
CP018318.1	Klebsiella pneumonia	AC
CP018689.1	Klebsiella pneumonia	AC
CP018698.1	Klebsiella pneumonia	AC
CP018704.1	Klebsiella pneumonia	AC
CP018710.1	Klebsiella pneumonia	AC
CP018716.1	Klebsiella pneumonia	AC
CP019001.1	E. coli	AC
CP019053.1	E. coli	AC
CP019074.1	E. coli	yes
CP019441.1	Edwardsiella piscicida	Ac
CP021550.1	Proteus mirabilis	no
CP021946.1	Klebsiella pneumonia	yes
CP022176.1	Aeromonas salmonicida	yes
CP024140.1	E. coli	F
CP024157.1	E. coli	F
CP024459.1	Klebsiella pneumonia	F
CP024824.1	E. coli	AC
CP025340.1	Salmonella Typhimurium	HI2
EF495198.1	Aeromonas bestiarum	yes
FJ621586.1	E. coli	AC
FJ621587.1	Salmonella	AC
FJ621588.1	E. coli	AC
GQ463139.1	Providencia alcalifaciens	ICE
GQ463140.1	Vibrio cholera	ICE
GQ463140.1	Vibrio cholera	ICE
GQ463141.1	Vibrio cholera	ICE
GQ463142.1	Vibrio cholera	ICE
HQ023861.1	E. coli	AC
HQ023862.1	E. coli	AC
HQ023863.1	E. coli	AC
JF267651.1	Salmonella Dublin	AC
JN648379.1	Vibrio parahaemolyticus	ICE
JN687470.1	Providencia stuartii	AC
JN983043.1	Salmonella Heidelberg	AC
JN983045.1	Salmonella Heidelberg	AC
JN983048.1	Salmonella Heidelberg	AC
JX442976.1	Klebsiella pneumonia	AC
KC853434.1	E. coli	yes
KC886257.1	Vibrio cholera	ICE
KC886258.1	Vibrio cholera	ICE
KJ909290.1	Aeromonas salmonicida	AC
KJ909292.1	Aeromonas salmonicida	yes
KP056256.1	E. coli	AC
KR091911.1	Salmonella Corvallis	AC
KR559888.1	Klebsiella pneumonia	AC
KR559889.1	Klebsiella pneumonia	AC
KT282968.1	E. coli	I1
KT962845.1	Proteus mirabilis	no
KT990220.1	E. coli	F
KT997783.1	Vibrio alginolyticus	AC
KU306390.1	Vibrio	no
KU321583.1	E. coli	F
KU356480.1	Vibrio parahaemolyticus	yes
KU605240.1	Proteus mirabilis	AC
KX023259.1	E. coli	yes
KX243411.1	Proteus mirabilis	no
KX243412.1	Proteus mirabilis	no
KX243416.1	Proteus mirabilis	ICE
KX815983.1	Salmonella Dublin	AC
KY014465.1	Vibrio parahaemolyticus	AC
KY382506.1	Vibrio cholera	ICE
KY382507.1	Vibrio cholera	ICE
KY399978.1	Vibrio cholera	AC
KY437726.1	Proteus mirabilis	ICE
KY437727.1	Proteus mirabilis	ICE
KY437728.1	Proteus mirabilis	ICE
KY748190.1	E. coli	I1
KY986974.1	Citrobacter freundii	AC
LC056341.1	E. coli	yes
MF589339.1	E.coli	F
MF627444.1	Vibrio parahaemolyticus	AC
MF627445.1	Vibrio parahaemolyticus	AC

## Sheet: Supplementary Table 10
Supplementary Table 10. Isolates from NCBI containing ARC6.
Accession Number	Bacteria	Plasmid?
AB571865.1	Photobacterium damselae subsp. damselae	Yes
AB856327.1	Vibrio sp.	Yes
AF223162.1	Salmonella Typhi	Yes
AF250878.1	Salmonella Typhi	HI1
AJ627386.1	Haemophilus influenza	Yes
AM412236.1	Salmonella Paratyphi A	HI1
AM886293.1	E. coli	F
AP000342.1	Shigella flexneri	F
AP005147.1	Salmonella Typhimurium	Yes
AP011954.1	Salmonella Typhimurium	Yes
AP018352.1	Enterobacter hormaechei	HI2
BX664015.1	Serratia marcescens	HI2
CP000602.1	Yersinia ruckeri	Yes
CP000913.1	E. coli	F
CP001091.1	Actinobacillus pleuropneumoniae
CP001091.1	Actinobacillus pleuropneumoniae
CP001122.1	Salmonella Kentucky
CP002089.1	Salmonella Kentucky
CP002090.1	Salmonella Kentucky
CP002667.1	Gallibacterium anatis
CP003279.1	Salmonella Typhi	HI1
CP003683.1	Klebsiella michiganensis
CP004345.1	Morganella morganii
CP006636.1	E. coli
CP006834.1	E. coli
CP007040.1	Pasteurella multocida
CP007445.1	Gilliamella apicola
CP009056.1	Frischella perrara
CP009166.1	E. coli
CP009232.1	E. coli	F
CP009644.1	E. coli
CP010157.1	E. coli
CP010372.1	E. coli	F
CP010373.2	E. coli	Yes
CP012197.1	E. coli	F
CP014026.2	Morganella morganii
CP014320.1	E. coli	F
CP015431.1	Haemophilus ducreyi
CP015432.1	Haemophilus ducreyi
CP015433.1	Haemophilus ducreyi
CP015434.1	Haemophilus ducreyi
CP015836.1	E. coli	F
CP015842.1	E. coli
CP015843.2	E. coli
CP015846.1	E. coli
CP016182.2	E. coli
CP016546.1	E. coli
CP016625.1	E. coli
CP018652.1	Salmonella Enteriditis	HI1
CP018656.1	Salmonella Enteriditis	HI1
CP019559.1	E. coli	HI2
CP019944.1	E. coli
CP021175.1	E. coli
CP021699.1	Klebsiella pneumoniae	Yes
CP021880.1	E. coli	F
CP022348.1	Klebsiella michiganensis
CP022715.1	Actinobacillus pleuropneumoniae
CP023185.1	Klebsiella michiganensis
CP023383.1	E. coli
CP023673.1	E. coli
CP023923.1	Klebsiella pneumoniae	F
CP023959.1	E. coli	F
CP024039.1	Klebsiella pneumoniae	F
CP024095.1	E. coli	Yes
CP024129.1	E. coli	Yes
CP024223.1	E. coli
CP024254.1	E. coli	K
CP024263.1	E. coli
CP024269.1	E. coli
CP024273.1	E. coli
CP024471.1	Shigella flexneri
CP024473.1	Shigella flexneri
CP024652.2	E. coli	F
CP024815.1	E. coli
CP024816.1	E. coli
CP024830.1	E. coli
CP024831.1	E. coli
CP025139.1	E. coli	F
CP025253.1	E. coli	F
CP025254.1	E. coli	F
CP025708.1	E. coli	F
CP025751.1	E. coli	F
CP026046.1	Morganella morganii
CP026098.1	Shigella flexneri
CP026651.1	Morganella morganii
CP026776.1	Shigella flexneri
CP026778.1	Shigella dysenteriae	K
CP026782.1	Shigella dysenteriae	Yes
CP026803.1	Shigella dysenteriae	Yes
CP026807.1	Shigella dysenteriae	Yes
CP026815.1	Shigella dysenteriae	Yes
CP026819.1	Shigella dysenteriae	Yes
CP026823.1	Shigella dysenteriae	Yes
CU928145.2	E. coli
CU928148.1	E. coli
DQ364638.1	E. coli	F
FJ449539.1	E. coli	F
FQ312002.1	Haemophilus parainfluenza
JN983042.1	Salmonella Heidelberg	HI2
JQ966983.1	Candidatus snodgrassella
JX515588.1	Raoultella planticola	Yes
KM406488.1	Salmonella Paratyphi B	Yes
KP453775.1	Klebsiella pneumoniae	F
KP789020.1	E. coli	F
KT754160.1	Shigella dysenteriae	F
KT754166.1	Shigella dysenteriae	K
KT754167.1	Shigella dysenteriae	K
KU551309.1	Actinobacillus pleuropneumoniae
KU551310.1	Actinobacillus pleuropneumoniae
KU551311.1	Actinobacillus pleuropneumoniae
KU551312.1	Actinobacillus pleuropneumoniae
KU551313.1	Actinobacillus pleuropneumoniae
KU551314.1	Actinobacillus pleuropneumoniae
KU551315.1	Actinobacillus pleuropneumoniae
KU551316.1	Actinobacillus pleuropneumoniae
KU551320.1	Actinobacillus pleuropneumoniae
KU551323.1	Actinobacillus pleuropneumoniae
KU551327.1	Actinobacillus pleuropneumoniae
KU551331.1	Actinobacillus pleuropneumoniae
KU551333.1	Actinobacillus pleuropneumoniae
KU551336.1	Actinobacillus pleuropneumoniae
KU551337.1	Actinobacillus pleuropneumoniae
KU551339.1	Actinobacillus pleuropneumoniae
KX683283.1	E. coli	Yes
KX683283.1	E. coli	Yes
KX957968.1	Vibrio alginolyticus	Yes
LM995856.1	E. coli
LN869922.1	Kingella kingae
LN908249.1	Actinobacillus pleuropneumoniae
LT838196.1	E. coli
LT838200.1	E. coli
LT844544.1	Yersinia pestis	HI1
LT904879.1	Salmonella Typhi	HI1
LT905061.1	Salmonella Typhi	HI1
LT906491.1	Salmonella Typhi	HI1
MF344581.1	Enterobacter cloacae	HI2
MG516911.1	Proteus mirabils
