# Supplementary material for: Antimicrobial Resistance Genes, Cassettes, and Plasmids Present in Salmonella enterica Associated With United States Food Animals
Source: Front Microbiol. 2019 Apr 17;10:832. doi: 10.3389/fmicb.2019.00832 (PMC6479191; doi:10.3389/fmicb.2019.00832)
Supplement: Supplementary file 2 [file Table_2.XLSX]

## Sheet: Cassette Confidence Intervals
Frequency of animal sources containing each ARC compared to other animal sources. Error bars reflect 95% Confidence intervals (95% CI)
ARC	Animal Source	Positive Isolates/Total isolates of animals source	Frequency	STDEV	95% CI negative	95% CI positive
1	Cattle	193/925	0.208649	0.406563	0.182449	0.234849
1	Chicken	2/4338	0.000461255	0.0214744	-0.0001779	0.0011004
1	Swine	15/1049	0.0142993	0.118778	0.0071115	0.0214872
1	Turkey	31/371	0.083558	0.277097	0.0553616	0.111754
2	Chicken	5/4338	0.00115314	0.0339422	0.000143	0.0021633
2	Swine	1/1049	0.000953289	0.0308754	-0.0009151	0.0028217
2	Turkey	5/371	0.0134771	0.115462	0.0017281	0.025226
3	Cattle	1/925	0.00108108	0.0328798	-0.00103783	0.0032
3	Chicken	16/4338	0.00369004	0.0606405	0.0018853	0.0054948
3	Swine	2/1049	0.00190658	0.0436435	-0.0007345	0.0045477
3	Turkey	1/371	0.00269542	0.0519174	-0.0025875	0.0079783
4	Cattle	112/925	0.121081	0.326398	0.100047	0.142115
4	Chicken	113/4338	0.0260609	0.159335	0.0213187	0.0308029
4	Swine	19/1049	0.0181125	0.133422	0.0100385	0.0261864
4	Turkey	14/371	0.0377358	0.190814	0.0183193	0.0571524
5	Cattle	120/925	0.12973	0.336188	0.108065	0.151395
5	Chicken	7/4338	0.00161439	0.0401517	0.0004194	0.0028094
5	Swine	9/1049	0.0085796	0.0922719	0.0029958	0.0141634
5	Turkey	6/371	0.0161725	0.126309	0.0033198	0.0290252
6	Cattle	11/925	0.0118919	0.108458	0.0049025	0.0188812
6	Chicken	295/4338	0.0680351	0.251835	0.0605401	0.07553
6	Swine	35/1049	0.0333651	0.179674	0.0224922	0.044238
6	Turkey	13/371	0.0350404	0.18413	0.016304	0.0537769

## Sheet: Animal Confidence Intervals
Frequency of animal sources containing each ARC compared to the frequencies of containing other ARCs. Error bars reflect 95% Confidence intervals (95% CI)
ARC	Animal Source	Positive Isolates/Total isolates of animals source	Frequency	STDEV	95% CI negative	95% CI positive
1	Cattle	193/925	0.208649	0.406563	0.182449	0.234849
3	Cattle	1/925	0.00108108	0.0328798	-0.00103783	0.0032
4	Cattle	112/925	0.121081	0.326398	0.100047	0.142115
5	Cattle	120/925	0.12973	0.336188	0.108065	0.151395
6	Cattle	11/925	0.0118919	0.108458	0.0049025	0.0188812
1	Chicken	2/4338	0.000461255	0.0214744	-0.0001779	0.0011004
2	Chicken	5/4338	0.00115314	0.0339422	0.000143	0.0021633
3	Chicken	16/4338	0.00369004	0.0606405	0.0018853	0.0054948
4	Chicken	113/4338	0.0260609	0.159335	0.0213187	0.0308029
5	Chicken	7/4338	0.00161439	0.0401517	0.0004194	0.0028094
6	Chicken	295/4338	0.0680351	0.251835	0.0605401	0.07553
1	Swine	15/1049	0.0142993	0.118778	0.0071115	0.0214872
2	Swine	1/1049	0.000953289	0.0308754	-0.0009151	0.0028217
3	Swine	2/1049	0.00190658	0.0436435	-0.0007345	0.0045477
4	Swine	19/1049	0.0181125	0.133422	0.0100385	0.0261864
5	Swine	9/1049	0.0085796	0.0922719	0.0029958	0.0141634
6	Swine	35/1049	0.0333651	0.179674	0.0224922	0.044238
1	Turkey	31/371	0.083558	0.277097	0.0553616	0.111754
2	Turkey	5/371	0.0134771	0.115462	0.0017281	0.025226
3	Turkey	1/371	0.00269542	0.0519174	-0.0025875	0.0079783
4	Turkey	14/371	0.0377358	0.190814	0.0183193	0.0571524
5	Turkey	6/371	0.0161725	0.126309	0.0033198	0.0290252
6	Turkey	13/371	0.0350404	0.18413	0.016304	0.0537769

## Sheet: Serotype Confidence Intervals
Frequency ofserotypes containing each ARC compared to other serotypes for each ARC. Error bars reflect 95% Confidence intervals (95% CI).
ARC	Serovar	Positive Isolates/Total of Serotype	Frequency	STDEV	95% CI negative	95% CI positive
1	Agona	6/61	0.0983607	0.300273	0.0230078	0.173713
1	Derby	2/93	0.0215054	0.145848	-0.0081366	0.0511473
1	Dublin	93/110	0.845455	0.363125	0.777595	0.913314
1	Heidelberg	7/227	0.030837	0.173258	0.0082983	0.0533757
1	I 4,[5],12:i:-	2/221	0.00904977	0.0949138	-0.0034638	0.0215634
1	Infantis	3/836	0.00358852	0.0598324	-0.0004673	0.007644
1	London	1/60	0.0166667	0.129099	-0.0159994	0.0493327
1	Muenchen	1/68	0.0147059	0.121268	-0.0141171	0.0435288
1	Newport	88/145	0.606897	0.490133	0.52712	0.686674
1	Ohio	2/70	0.0285714	0.167802	-0.0107378	0.0678807
1	Reading	27/81	0.333333	0.474342	0.230034	0.436632
1	Senftenberg	1/46	0.0217391	0.147442	-0.0208687	0.064347
1	Typhimurium	9/420	0.0214286	0.144981	0.0075631	0.035294
2	I 4,[5],12:i:-	2/221	0.00904977	0.0949138	-0.0034638	0.0215633
2	Kentucky	1/1340	0.000746269	0.0273179	-0.0007164	0.0022089
2	London	1/60	0.0166667	0.129099	-0.0159994	0.0493327
2	Schwarzengrund	6/339	0.0176991	0.13205	0.0036422	0.031756
2	Senftenberg	1/46	0.0217391	0.147442	-0.0208688	0.064347
3	Heidelberg	19/227	0.0837004	0.27755	0.0475946	0.119806
3	Mbandaka	1/47	0.0212766	0.145865	-0.0204247	0.062978
3	Senftenberg	1/46	0.0217391	0.147442	-0.0208687	0.064347
4	Agona	7/61	0.114754	0.32137	0.034107	0.195401
4	Cerro	1/48	0.0208333	0.144338	-0.0199992	0.0616659
4	Derby	1/93	0.0107527	0.103695	-0.0103222	0.0318276
4	Dublin	14/110	0.127273	0.334804	0.0647062	0.189839
4	Heidelberg	14/227	0.061674	0.241094	0.0303107	0.0930373
4	I 4,[5],12:i:-	10/221	0.0452489	0.208321	0.0177835	0.0727143
4	Infantis	5/836	0.00598086	0.0771506	0.0007511	0.0112107
4	Kentucky	48/1340	0.0358209	0.185913	0.0258667	0.0457751
4	Litchfield	2/23	0.0869565	0.288104	-0.0307861	0.204699
4	Liverpool	1/12	0.0833333	0.288675	-0.079997	0.246664
4	London	1/60	0.0166667	0.129099	-0.0159994	0.0493327
4	Mbandaka	1/47	0.0212766	0.145865	-0.0204247	0.062978
4	Newport	82/145	0.565517	0.497407	0.484556	0.646478
4	Ohio	1/70	0.0142857	0.119523	-0.137138	0.0422852
4	Reading	3/81	0.037037	0.190029	-0.0043463	0.0784204
4	Typhimurium	63/420	0.15	0.357497	0.11581	0.18419
4	Worthington	1/23	0.0434783	0.208514	-0.0417376	0.128694
5	Agona	5/61	0.0819672	0.276591	0.0125573	0.151377
5	Anatum	1/210	0.0047619	0.0690066	-0.0045712	0.0140951
5	Derby	2/93	0.0215054	0.145848	-0.0081366	0.0511473
5	Dublin	55/110	0.5	0.502288	0.406135	0.593865
5	I 4,[5],12:i:-	1/221	0.00452489	0.0672673	-0.0043437	0.0133935
5	Infantis	4/836	0.00478469	0.0690471	0.0001042	0.009452
5	Meleagridis	1/15	0.0666667	0.258199	-0.0639976	0.197331
5	Muenster	1/41	0.0243902	0.156174	-0.0234138	0.0721942
5	Newport	55/145	0.37931	0.486897	0.30006	0.458561
5	Ohio	1/70	0.0142857	0.119523	-0.137138	0.0422852
5	Reading	1/81	0.0123457	0.111111	-0.0118514	0.0365428
5	Rough_O_r:1,5	1/24	0.0416667	0.204124	-0.0399985	0.123332
5	Senftenberg	1/46	0.0217391	0.147442	-0.0208687	0.064347
5	Typhimurium	6/420	0.0142857	0.118808	0.0029234	0.0256481
6	4,[5],12:d:­	1/6	0.166667	0.408248	-0.159994	0.493327
6	Agona	2/61	0.0327869	0.179556	-0.0122723	0.0778461
6	Albany	3/18	0.166667	0.383482	-0.01049	0.343823
6	Anatum	3/210	0.0142857	0.11895	-0.0018023	0.0303737
6	Berta	5/29	0.172414	0.384426	0.0324996	0.312328
6	Bovismorbificans	2/9	0.222222	0.440959	-0.0658654	0.51031
6	Braenderup	1/56	0.0178571	0.133631	-0.0171422	0.0528565
6	Brandenburg	1/28	0.0357143	0.188982	-0.0342844	0.105713
6	Derby	18/93	0.193548	0.39722	0.112818	0.274279
6	Heidelberg	18/227	0.0792952	0.270796	0.044068	0.114522
6	I 4,[5],12:i:-	3/221	0.0135747	0.11598	-0.0017162	0.0288656
6	Infantis	1/836	0.00119617	0.0345857	-0.0011483	0.0035406
6	Johannesburg	3/88	0.0340909	0.182503	-0.0040399	0.0722217
6	Kentucky	276/1340	0.20597	0.40456	0.184309	0.227631
6	London	3/60	0.05	0.219784	-0.005612	0.105612
6	Mbandaka	3/47	0.0638298	0.247092	-0.0068114	0.134471
6	Montevideo	3/216	0.0138889	0.0680414	0.004815	0.0229628
6	Oranienburg	3/8	0.375	0.353553	0.130004	0.619996
6	Schwarzengrund	1/339	0.00294985	0.0543125	-0.0028318	0.0087315
6	Uganda	1/78	0.0128205	0.113228	-0.0123072	0.0379483

## Sheet: Conditional Probabilities
Conditional probabilities of the FSIS isolates containing an ARC if they are known to already contain another ARC. First (or first and second) number is the ARC already known to exist in the isolate. Second (or third) number is the ARC which the probability refers to. Total refers to all animal sources together.
a, b or a, b, c	Total	Cattle	Chicken	Swine	Turkey
1,4	48.1328	52.3316	100	46.6667	19.3548
1,4,5	61.2069	60.396	50	71.4286	66.6667
1,5	53.527	58.5492	100	60	16.129
1,5,4	0.550388	0.539823	0.5	0.555556	0.8
2,4	9.09091	NA	NA	NA	20
3,4	10	NA	6.25	NA	NA
3,4,6	50	NA	100	NA	NA
3,6	85	100	93.75	50	NA
3,6,4	0.0588235	NA	0.0666667	NA	NA
4,1	0.449612	0.901786	0.0176991	0.368421	0.428571
4,1,5	0.612069	0.60396	0.5	0.714286	0.666667
4,2	0.00387597	NA	NA	NA	0.0714286
4,3	0.00775194	NA	0.00884956	NA	NA
4,3,6	0.5	NA	1	NA	NA
4,5	29.845	57.1429	1.76991	31.5789	35.7143
4,5,1	0.922078	0.953125	0.5	0.833333	0.8
4,6	3.10078	NA	7.07965	NA	NA
4,6,3	0.125	NA	0.125	NA	NA
5,1	0.908451	0.941667	0.285714	1	0.833333
5,1,4	0.550388	0.151707	0.5	0.555556	0.8
5,4	0.542254	0.533333	0.285714	0.666667	0.833333
5,4,1	0.922078	0.953125	0.5	0.833333	0.8
6,3	0.0480226	0.0909091	0.0508475	0.0285714	NA
6,3,4	0.0588235	NA	0.0666667	NA	NA
6,4	0.0225989	NA	0.0271186	NA	NA
6,4,3	0.125	NA	0.125	NA	NA
